# Supplementary material for: Carbon neutrality does not equal climate neutrality in saltmarsh restoration
Source: Research Square preprint supplement (doi:10.21203/rs.3.rs-1731723/v1), 2022-08-19
Supplement: Supplementary file 1 [file 4092202b364f0a13a7390ae8.docx]

# **Supplementary Information**


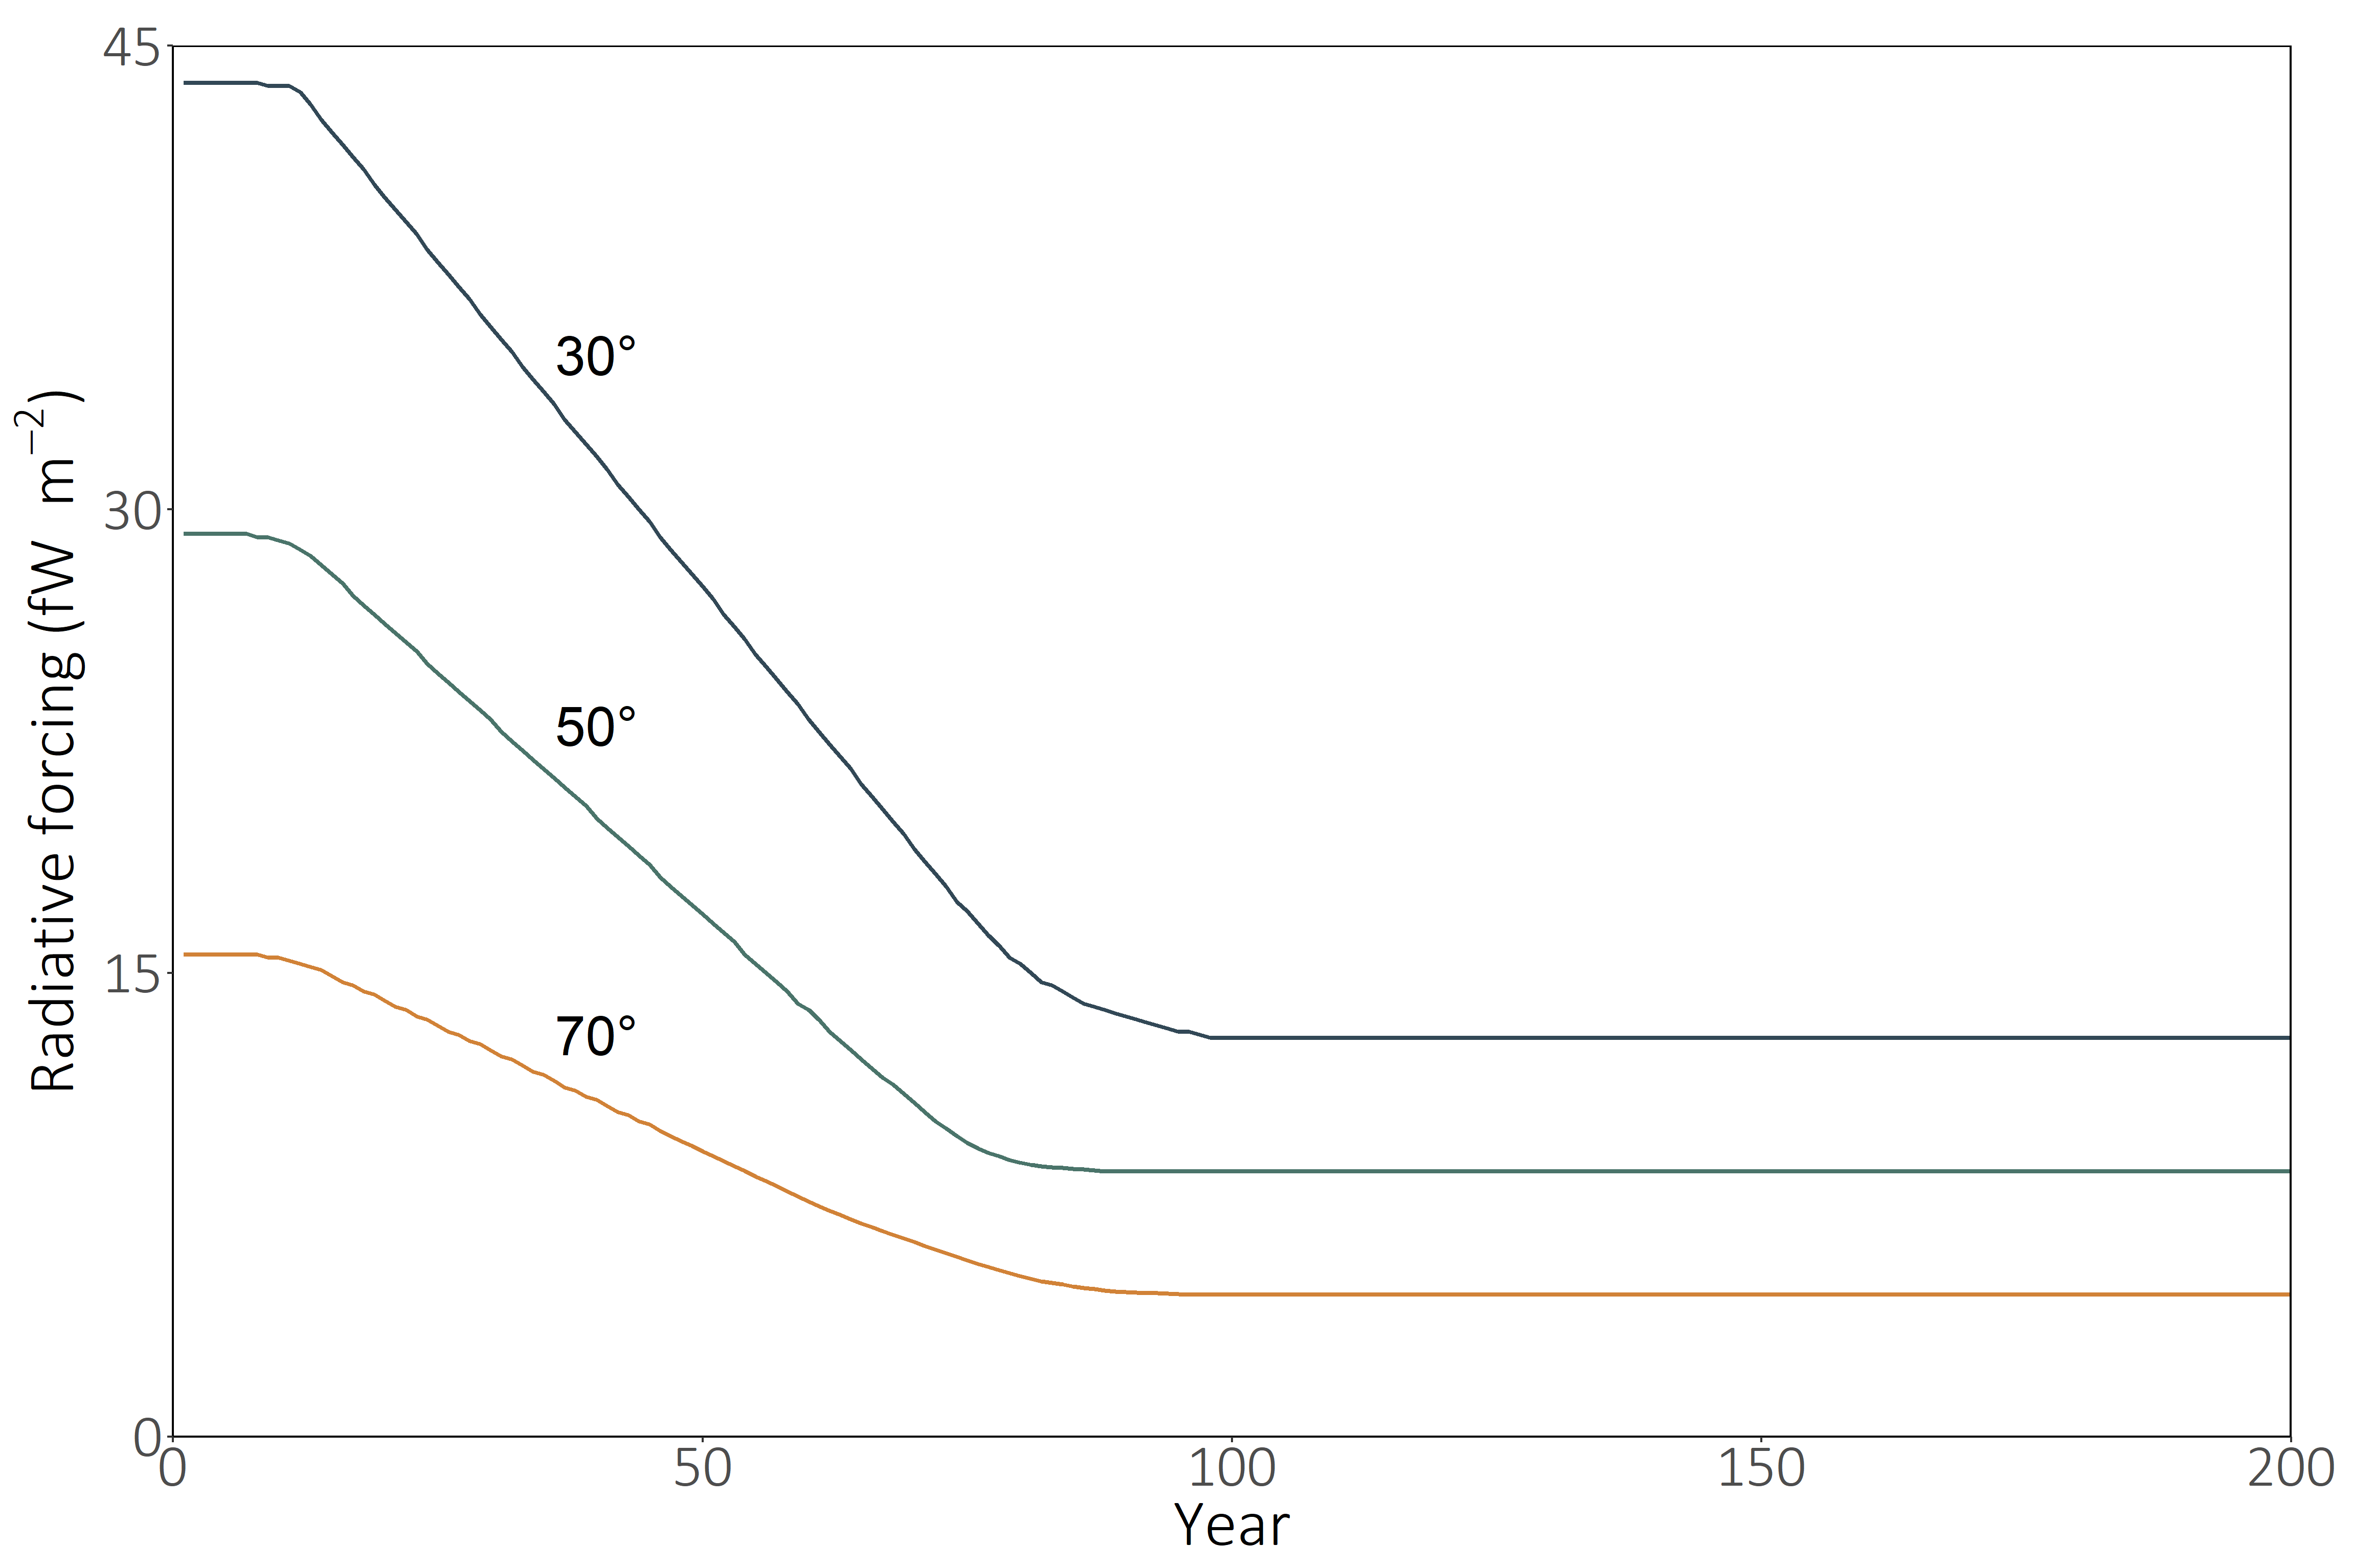


**Fig. S1** Radiative forcing for modelled albedo over 200 years at three latitudes: 30° (navy line), 50° (green line), and 70° (gold line).


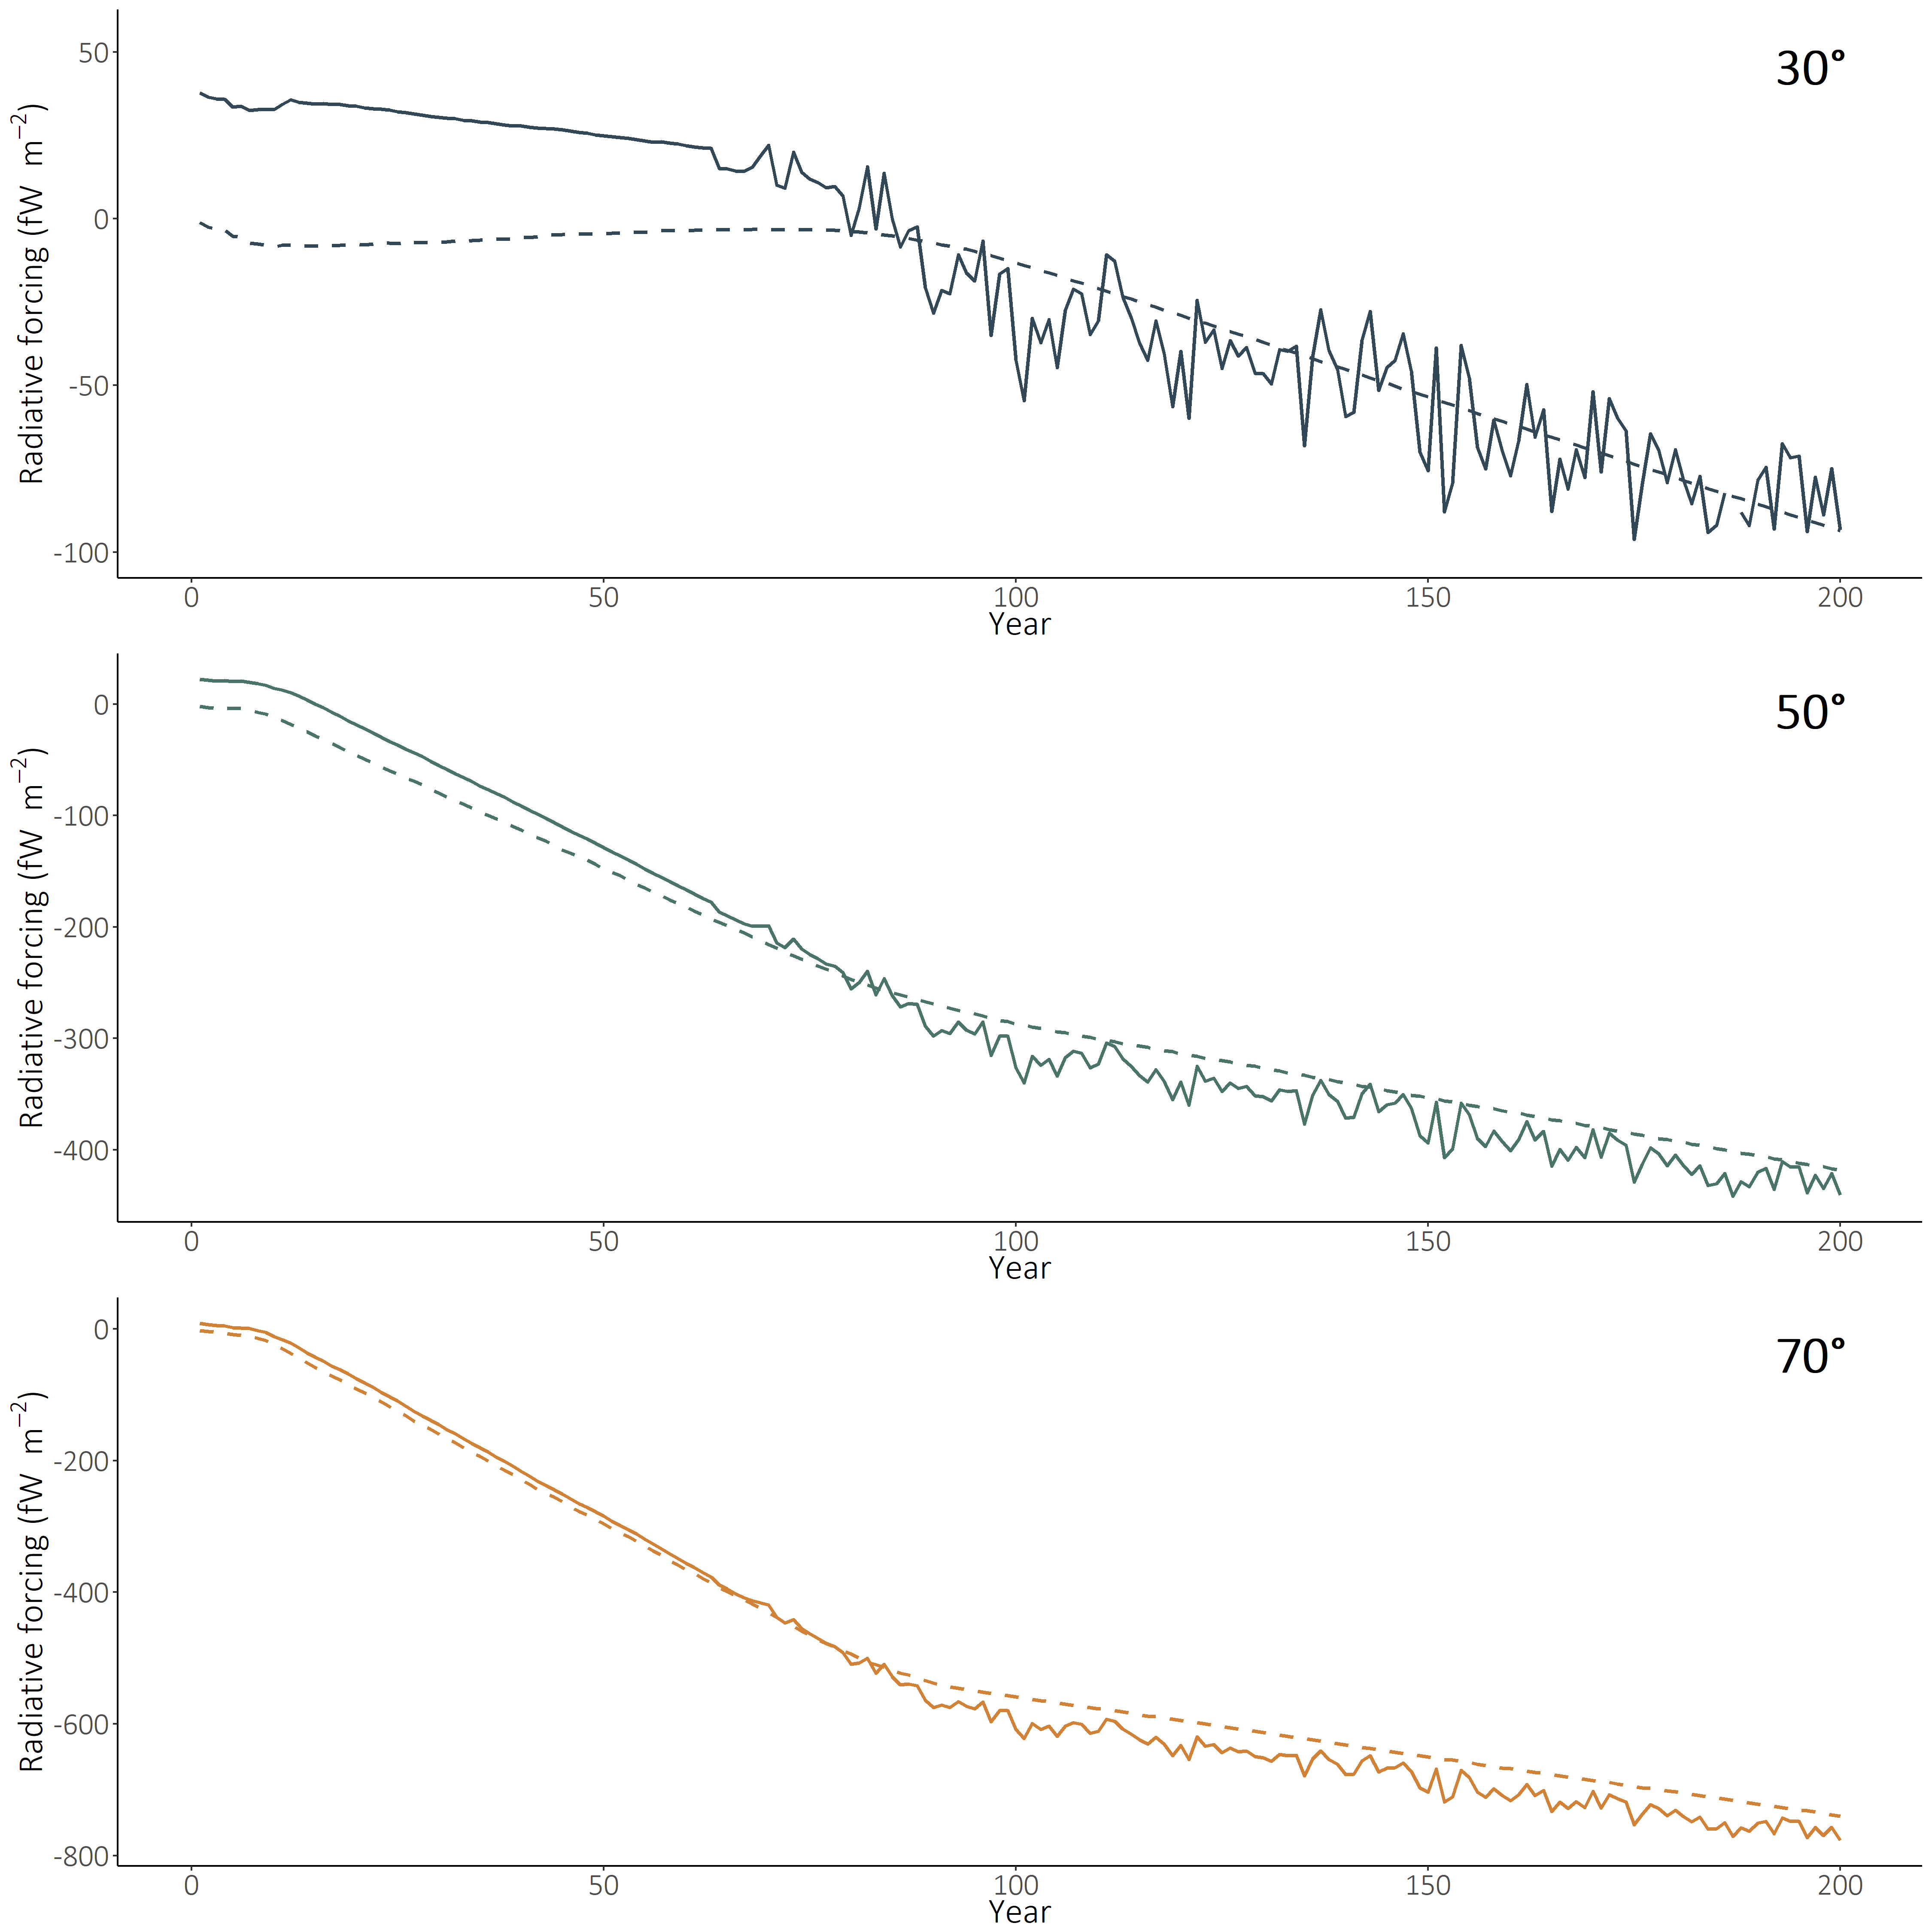


**Fig. S2** Radiative forcing of the modelled managed realignment of a saltmarsh over 200 years at three latitudes: 30° (navy), 50°

(green), and 70° (gold). Total radiative forcing is indicated by the solid line; carbon burial is indicated by the dotted line.


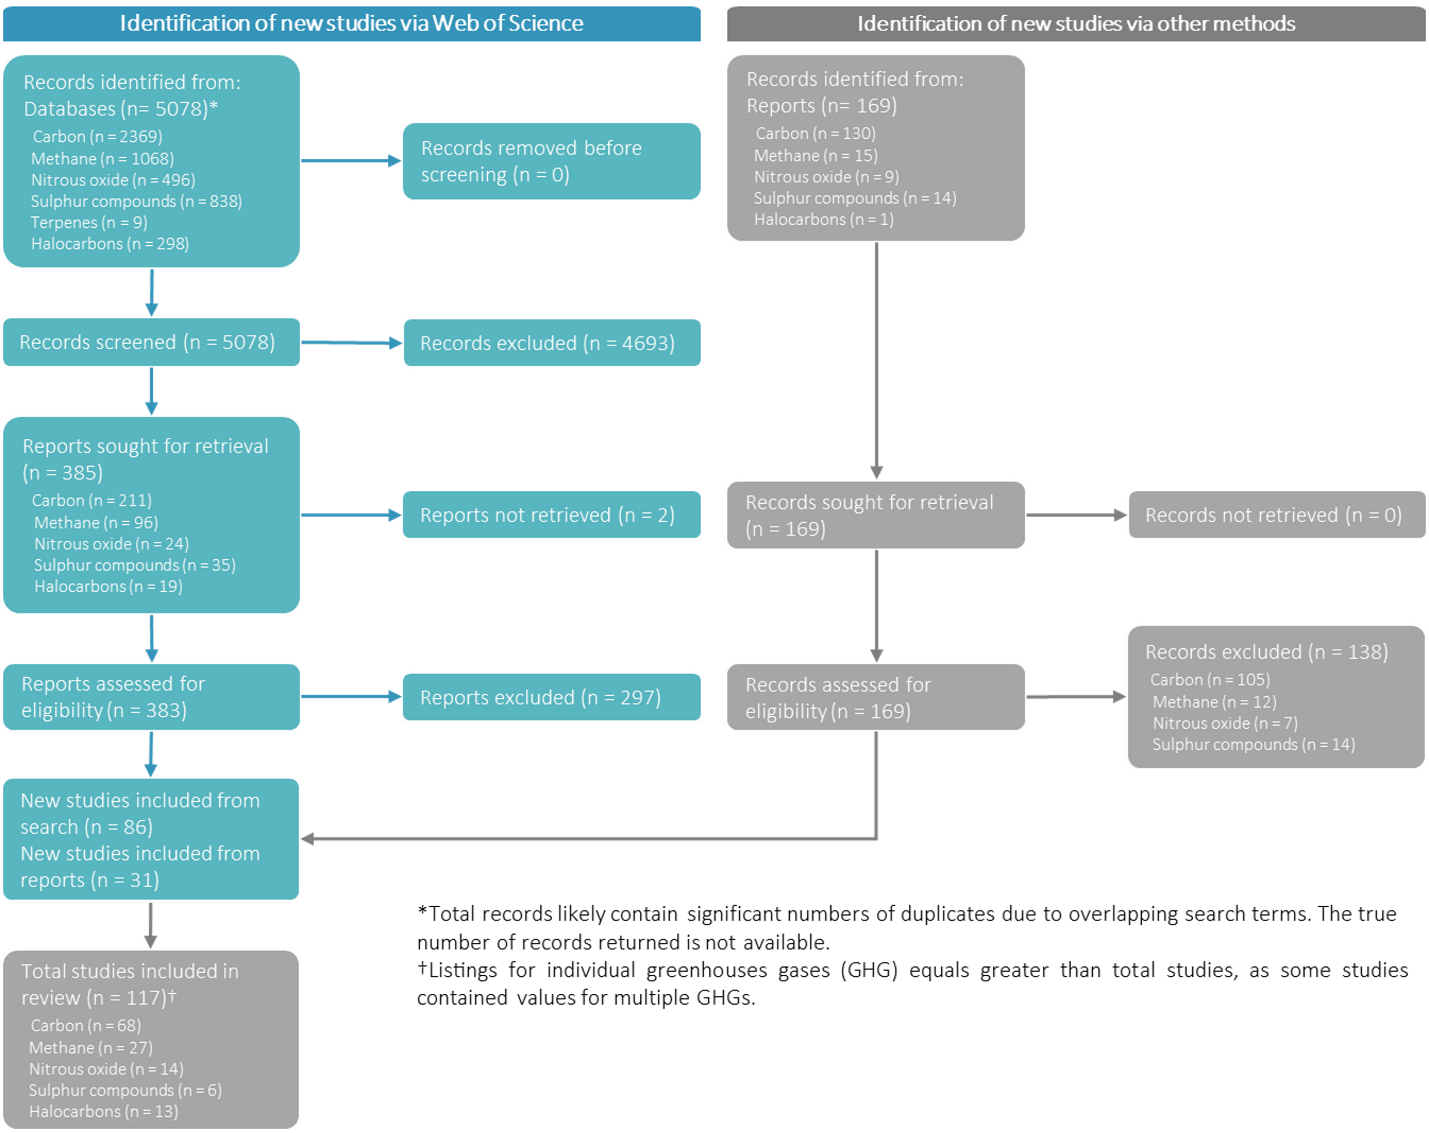


**Fig. S3** PRISMA flow chart of systematic study identification, eligibility assessment, and inclusion. Blue boxes refer to study identification via database searches; grey boxes refer to study identification from identified papers.


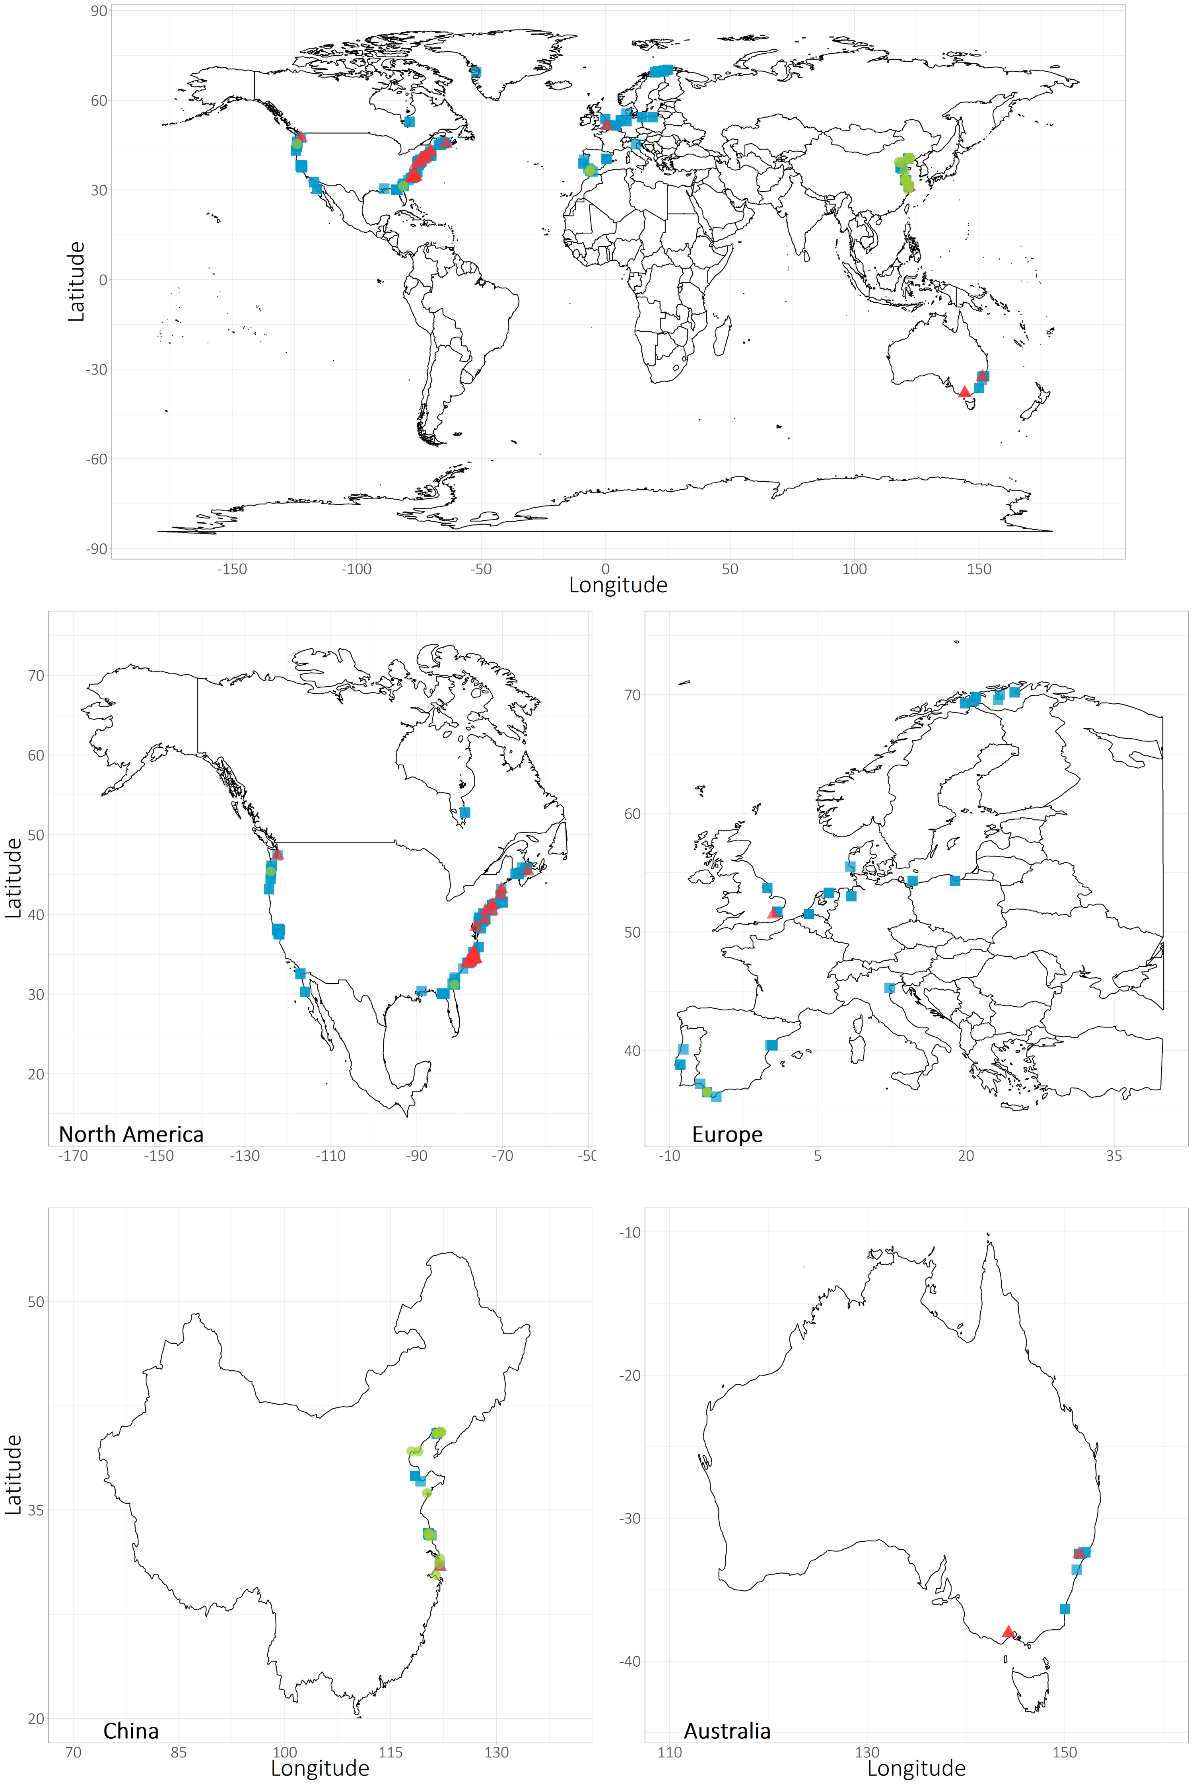


**Fig. S4** Coordinates of identified sites for carbon burial. Top row: World; Middle row: North America, Europe; Bottom row: China, Australia. Blue square refers to mature sites, green circle refers to realigned sites, and red triangle refers to mudflats.


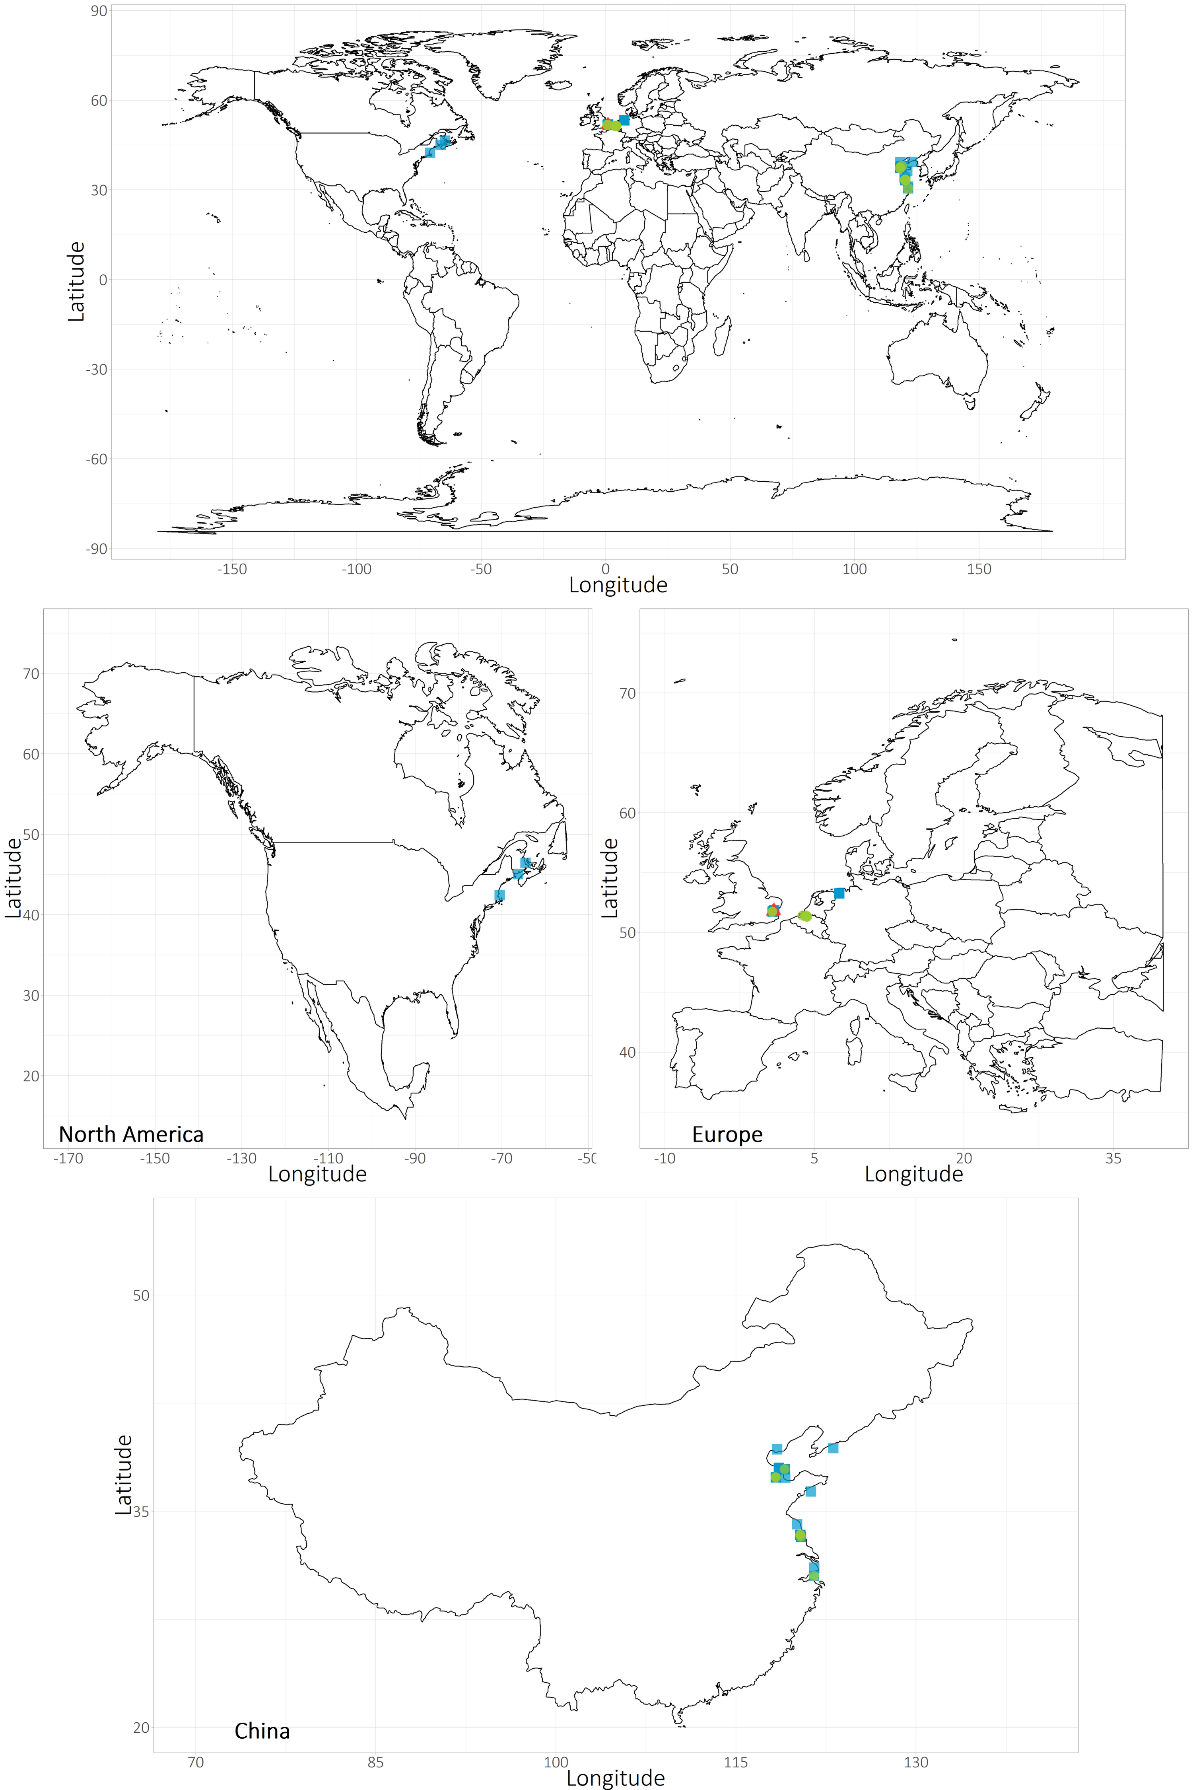


**Fig. S5** Coordinates of identified sites for methane emissions. Top row: World; Middle row: North America, Europe; Bottom row: China. Blue square refers to mature sites, green circle refers to realigned sites, and red triangle refers to mudflats.


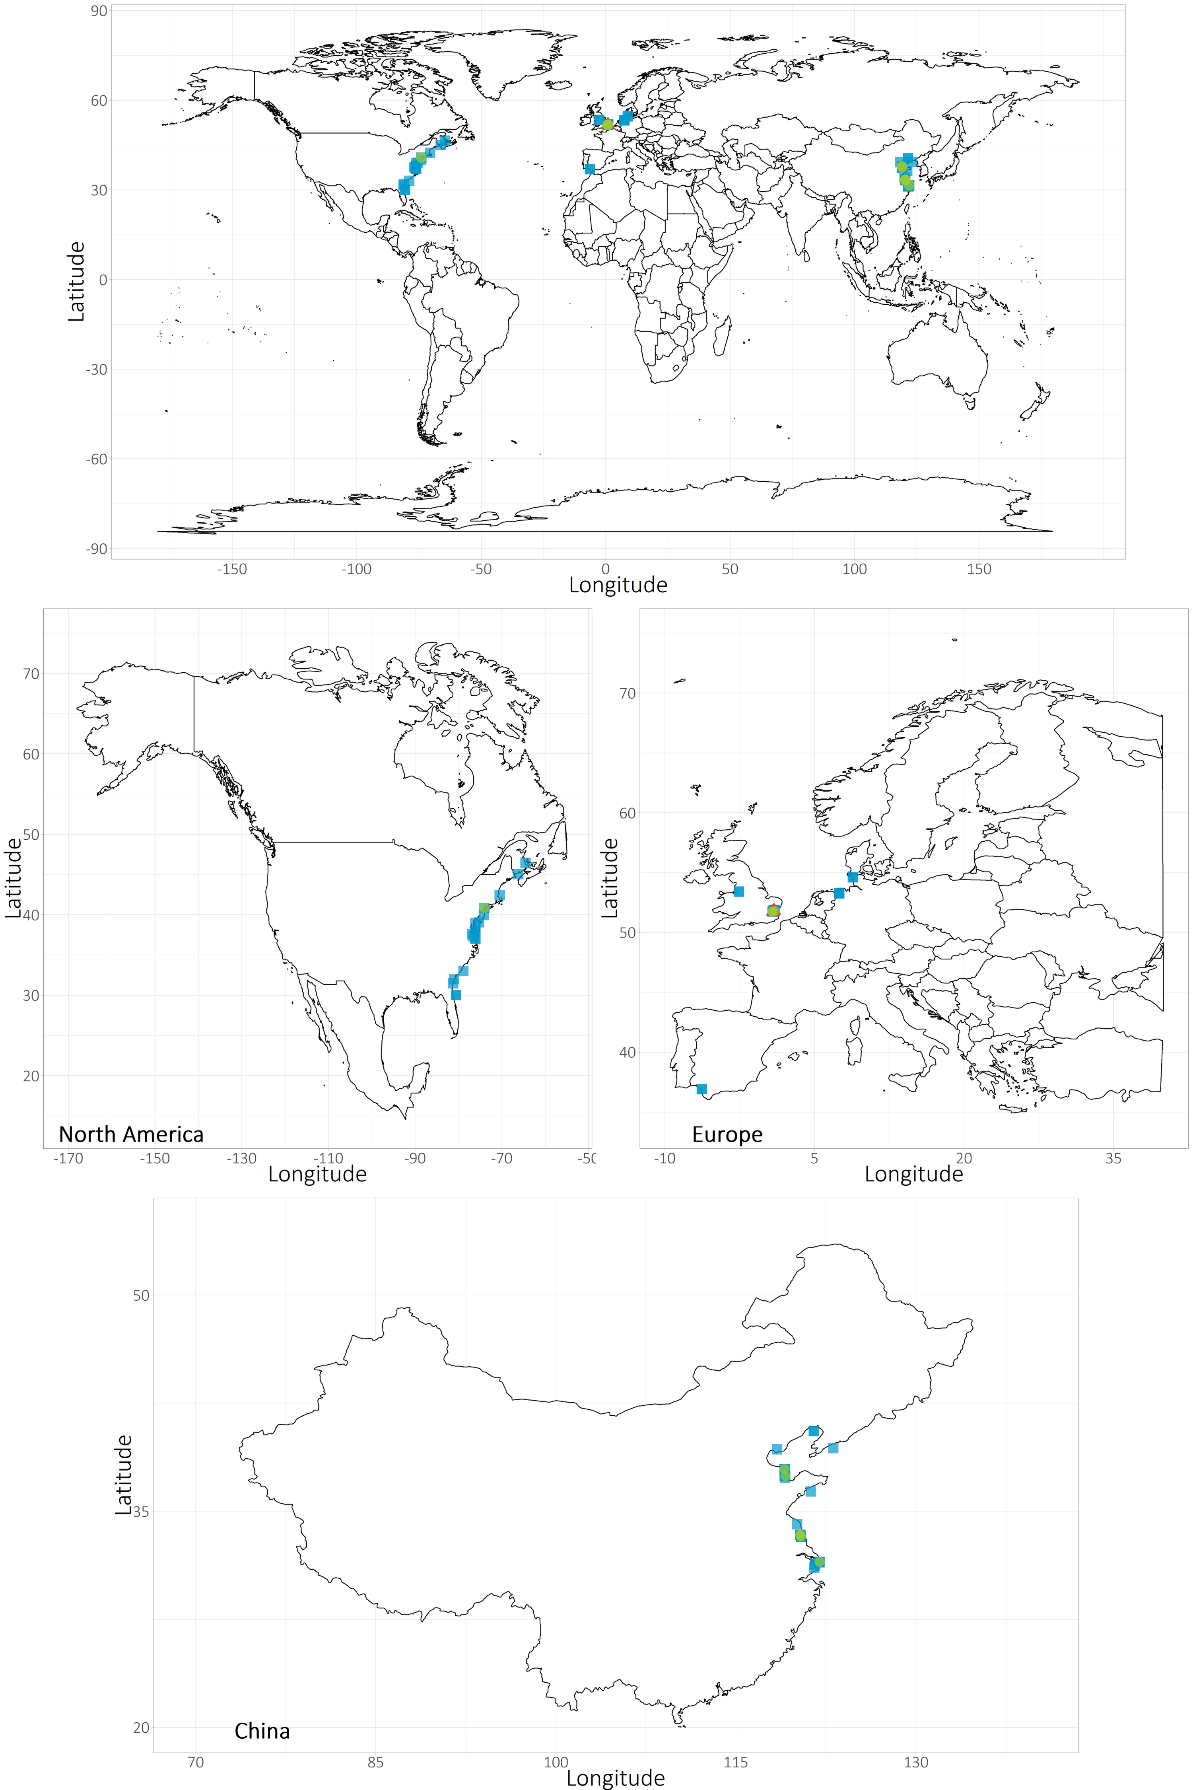


**Fig. S6** Coordinates of identified sites for nitrous oxide emissions. Top row: World; Middle row: North America, Europe; Bottom row: China. Blue square refers to mature sites, green circle refers to realigned sites, and red triangle refers to mudflats.


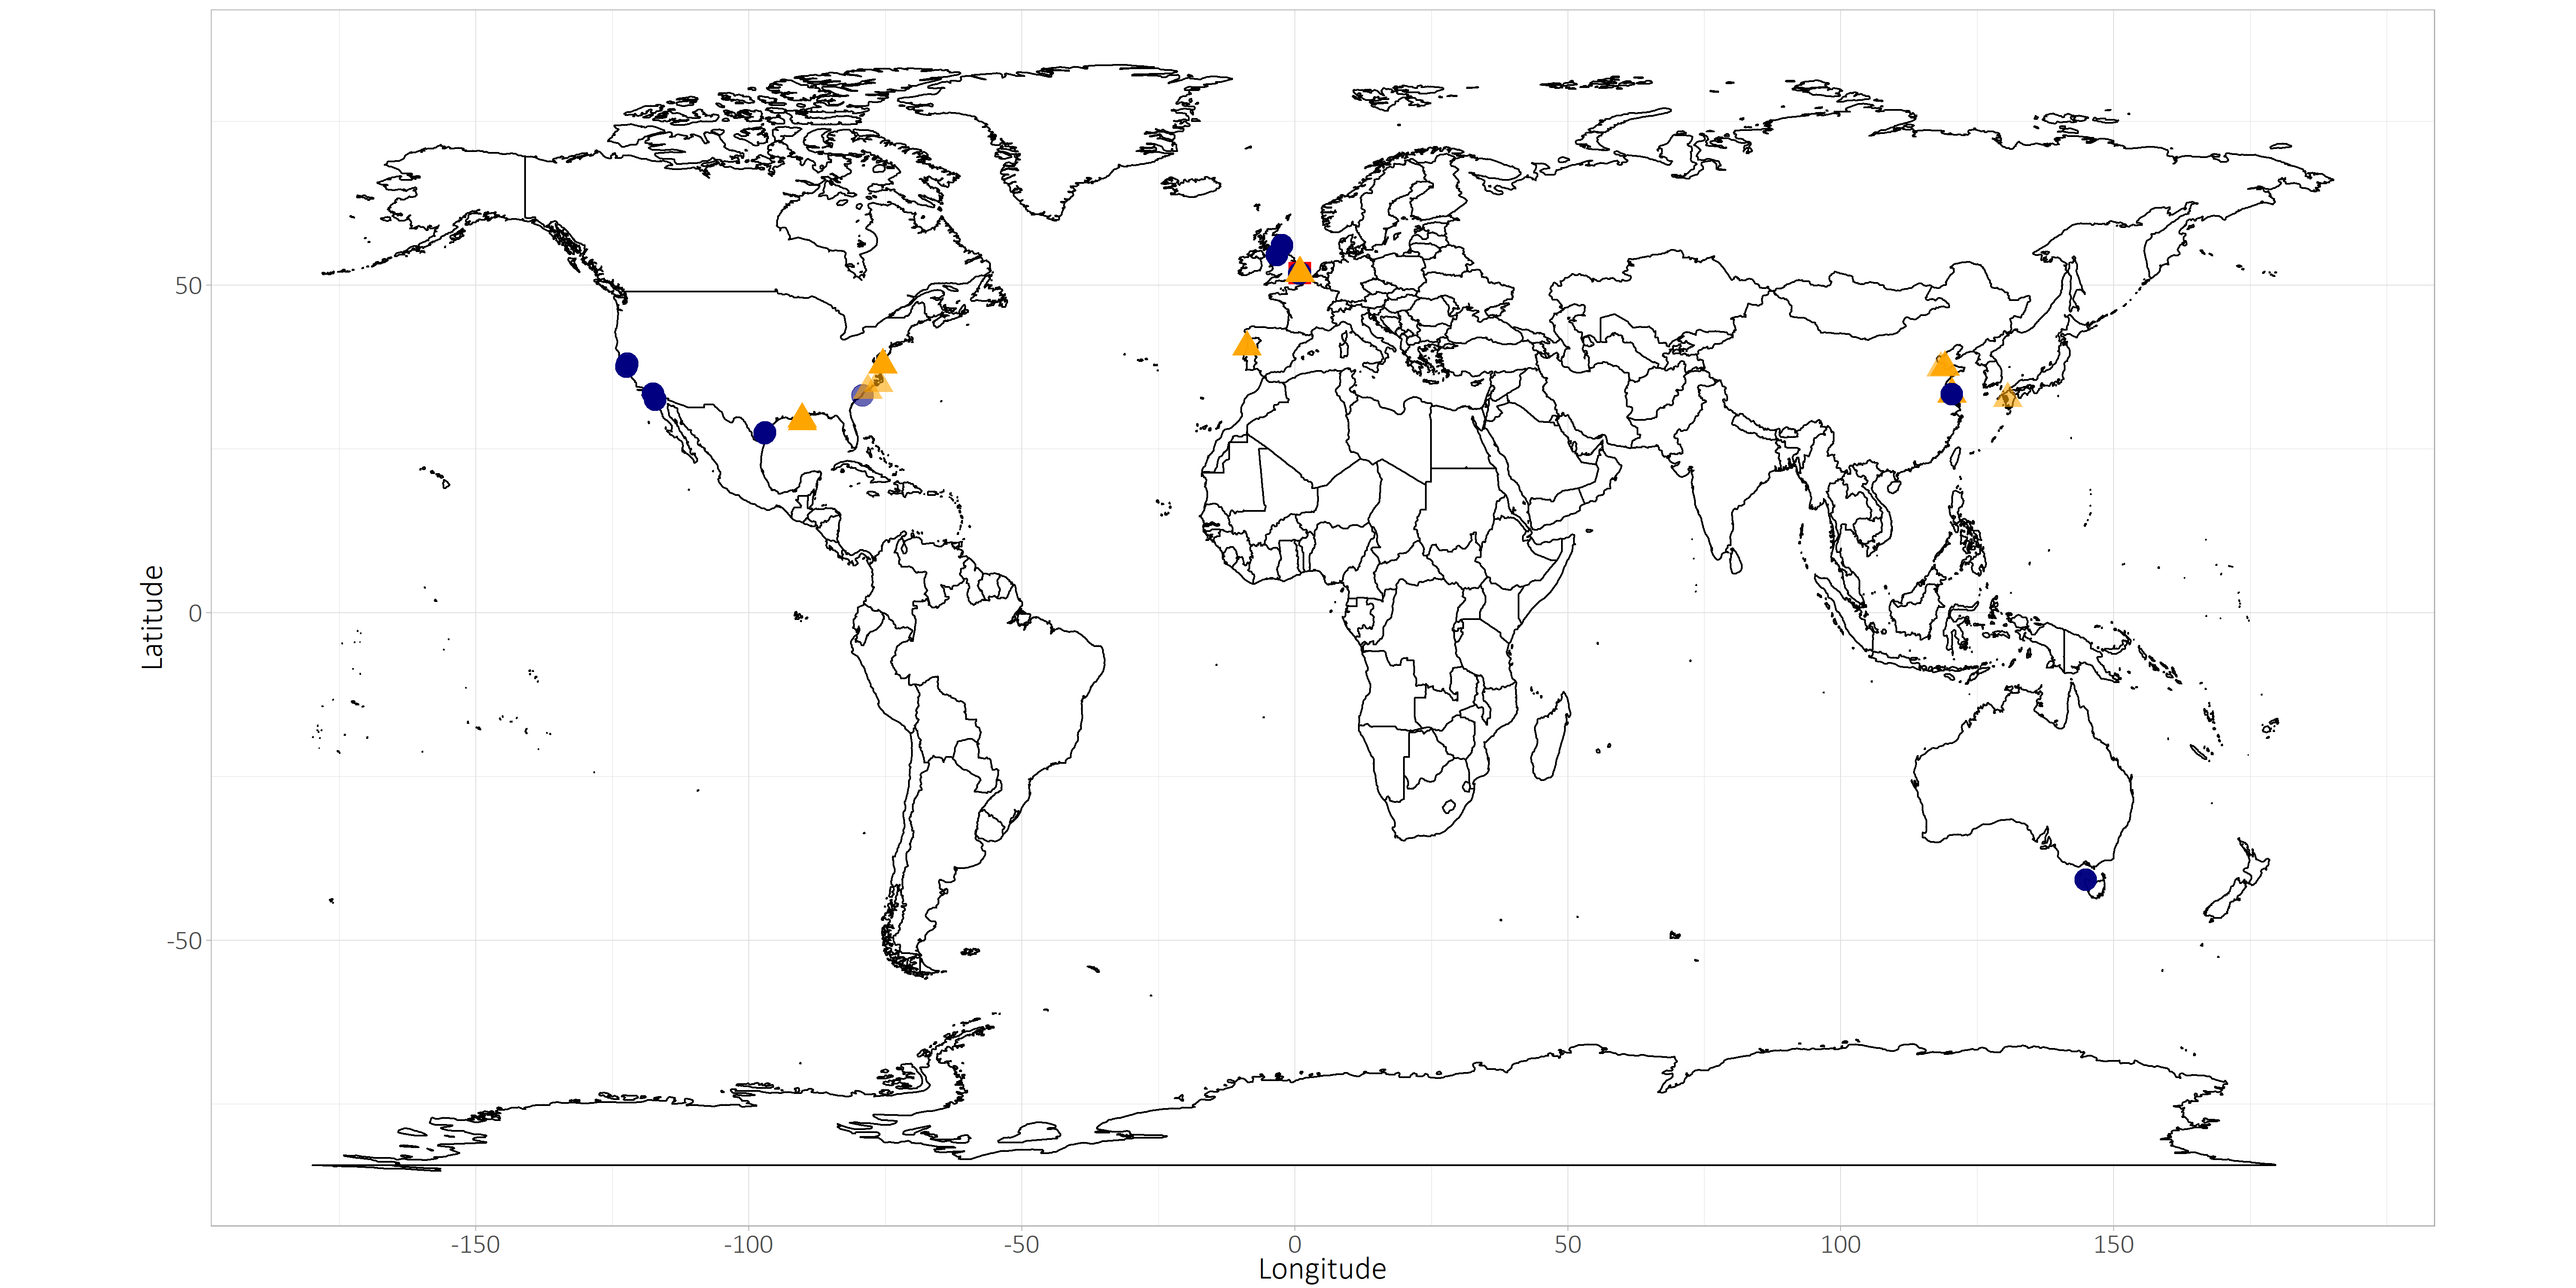


**Fig. S7** Coordinates of identified sites for other gaseous forcing agents. Top row: World; Middle row: North America, Europe; Bottom row: China, Australia. Navy circle refers to halocarbons, orange triangle refers to sulphur compounds, and red square refers to terpenes.

**Table S1** Search strings used to identify papers for inclusion. Number of results refers to number of returned results – duplications exist in result numbers due to overlapping search terms. Number selected for further review refers to paper identified as possibly relevant and in need of a full paper review.

| **Search string** | **Number of results** | **Number selected for  further review** | **Data of search** |
| --- | --- | --- | --- |
| **Carbon burial** | | | |
| saltmarsh + carbon sequestration | 70 | 36 | 27/04/2021 |
| saltmarsh + carbon storage | 51 | 3 | 28/04/2021 |
| saltmarsh + carbon burial | 27 | 1 | 28/04/2021 |
| saltmarsh + carbon accumulation | 56 | 1 | 04/05/2021 |
| tidal marsh + carbon sequestration | 195 | 12 | 29/04/2021 |
| tidal marsh + carbon storage | 127 | 2 | 28/04/2021 |
| tidal marsh + carbon burial | 33 | 3 | 28/04/2021 |
| tidal marsh + carbon accumulation | 192 | 10 | 04/05/2021 |
| salt marsh + carbon sequestration | 320 | 33 | 28/04/2021 |
| salt marsh + carbon storage | 245 | 72 | 27/04/2021 |
| salt marsh + carbon burial | 83 | 7 | 28/04/2021 |
| salt marsh + carbon accumulation | 352 | 1 | 04/05/2021 |
| mudflat* + carbon sequestration | 50 | 6 | 29/04/2021 |
| mudflat* + carbon storage | 36 | 2 | 29/04/2021 |
| mudflat* + carbon burial | 18 | 1 | 29/04/2021 |
| mudflat* + carbon accumulation | 60 | 3 | 29/04/2021 |
| mud flat* + carbon sequestration | 8 | 3 | 29/04/2021 |
| mud flat* + carbon storage | 9 | 1 | 29/04/2021 |
| mud flat* + carbon burial | 10 | 0 | 29/04/2021 |
| mud flat* + carbon accumulation | 19 | 1 | 29/04/2021 |
| tidal flat* + carbon sequestration | 50 | 3 | 29/04/2021 |
| tidal flat* + carbon storage | 34 | 2 | 29/04/2021 |
| tidal flat* + carbon burial | 23 | 1 | 29/04/2021 |
| tidal flat* + carbon accumulation | 69 | 1 | 29/04/2021 |
| realigned saltmarsh + carbon sequestration | 0 | 0 | 29/04/2021 |
| realigned saltmarsh + carbon storage | 0 | 0 | 29/04/2021 |
| realigned saltmarsh + carbon burial | 0 | 0 | 29/04/2021 |
| realigned saltmarsh + carbon accumulation | 0 | 0 | 29/04/2021 |
| realigned salt marsh + carbon sequestration | 1 | 0 | 29/04/2021 |
| realigned salt marsh + carbon storage | 1 | 0 | 29/04/2021 |
| realigned salt marsh + carbon burial | 1 | 0 | 29/04/2021 |
| realigned salt marsh + carbon accumulation | 1 | 0 | 29/04/2021 |
| restored saltmarsh + carbon sequestration | 9 | 0 | 29/04/2021 |
| restored saltmarsh + carbon storage | 5 | 0 | 29/04/2021 |
| restored saltmarsh + carbon burial | 3 | 0 | 29/04/2021 |
| restored saltmarsh + carbon accumulation | 35 | 1 | 29/04/2021 |
| restored salt marsh + carbon sequestration | 39 | 4 | 29/04/2021 |
| restored salt marsh + carbon storage | 24 | 0 | 29/04/2021 |
| restored salt marsh + carbon burial | 5 | 0 | 29/04/2021 |
| restored salt marsh + carbon accumulation | 7 | 0 | 29/04/2021 |
| managed saltmarsh + carbon sequestration | 12 | 0 | 29/04/2021 |
| managed saltmarsh + carbon storage | 5 | 0 | 29/04/2021 |
| managed saltmarsh + carbon burial | 4 | 0 | 29/04/2021 |
| managed saltmarsh + carbon accumulation | 2 | 0 | 29/04/2021 |
| managed salt marsh + carbon sequestration | 16 | 0 | 29/04/2021 |
| managed salt marsh + carbon storage | 11 | 0 | 29/04/2021 |
| managed salt marsh + carbon burial | 4 | 0 | 29/04/2021 |
| managed salt marsh + carbon accumulation | 10 | 0 | 29/04/2021 |
| managed realignment + carbon sequestration | 16 | 0 | 29/04/2021 |
| managed realignment + carbon storage | 9 | 1 | 29/04/2021 |
| managed realignment + carbon burial | 6 | 0 | 29/04/2021 |
| managed realignment + carbon accumulation | 6 | 1 | 29/04/2021 |

| **Search string** | **Number of results** | **Number selected for further review** | **Data of search** |
| --- | --- | --- | --- |
| **Methane emissions** | | | |
| saltmarsh + methane dynamics | 7 | 3 | 30/05/2021 |
| saltmarsh + methane | 32 | 3 | 30/05/2021 |
| saltmarsh + CH(4) | 0 | 0 | 30/05/2021 |
| saltmarsh + CH4 | 17 | 4 | 30/05/2021 |
| salt marsh + methane | 283 | 56 | 30/05/2021 |
| salt marsh + CH(4) | 9 | 1 | 30/05/2021 |
| salt marsh + CH4 | 156 | 7 | 30/05/2021 |
| tidal marsh + methane | 174 | 11 | 30/05/2021 |
| tidal marsh + CH(4) | 4 | 0 | 30/05/2021 |
| tidal marsh + CH4 | 122 | 4 | 30/05/2021 |
| mudflat* + methane | 42 | 3 | 30/05/2021 |
| mudflat* + CH(4) | 1 | 0 | 30/05/2021 |
| mudflat* + CH4 | 29 | 1 | 30/05/2021 |
| mud flat* + methane | 41 | 1 | 30/05/2021 |
| mud flat* + CH(4) | 1 | 0 | 30/05/2021 |
| mud flat* + CH4 | 10 | 0 | 30/05/2021 |
| tidal flat* + methane | 72 | 1 | 30/05/2021 |
| tidal flat* + CH(4) | 4 | 0 | 30/05/2021 |
| tidal flat* + CH4 | 28 | 1 | 30/05/2021 |
| realigned saltmarsh + methane | 0 | 0 | 31/05/2021 |
| realigned saltmarsh + CH(4) | 0 | 0 | 31/05/2021 |
| realigned saltmarsh + CH4 | 0 | 0 | 31/05/2021 |
| realigned salt marsh + methane | 1 | 0 | 31/05/2021 |
| realigned salt marsh + CH(4) | 0 | 0 | 31/05/2021 |
| realigned salt marsh + CH4 | 0 | 0 | 31/05/2021 |
| restored saltmarsh + methane | 1 | 0 | 31/05/2021 |
| restored saltmarsh + CH(4) | 0 | 0 | 31/05/2021 |
| restored saltmarsh + CH4 | 0 | 0 | 31/05/2021 |
| restored salt marsh + methane | 12 | 0 | 31/05/2021 |
| restored salt marsh + CH(4) | 0 | 0 | 31/05/2021 |
| restored salt marsh + CH4 | 7 | 0 | 31/05/2021 |
| managed saltmarsh + methane | 4 | 0 | 31/05/2021 |
| managed saltmarsh + CH(4) | 0 | 0 | 31/05/2021 |
| managed saltmarsh + CH4 | 1 | 0 | 31/05/2021 |
| managed salt marsh + methane | 7 | 0 | 31/05/2021 |
| managed salt marsh + CH(4) | 0 | 0 | 31/05/2021 |
| managed salt marsh + CH4 | 3 | 0 | 31/05/2021 |
| **Nitrous oxide** | | | |
| saltmarsh + nitrous oxide | 18 | 2 | 31/05/2021 |
| saltmarsh + N2O | 9 | 0 | 31/05/2021 |
| saltmarsh + dinitrogen oxide | 0 | 0 | 31/05/2021 |
| salt marsh + nitrous oxide | 123 | 8 | 31/05/2021 |
| salt marsh + N2O | 91 | 6 | 31/05/2021 |
| salt marsh + dinitrogen oxide | 6 | 0 | 31/05/2021 |
| tidal marsh + nitrous oxide | 67 | 1 | 31/05/2021 |
| tidal marsh + N2O | 47 | 0 | 31/05/2021 |
| tidal marsh + dinitrogen oxide | 0 | 0 | 31/05/2021 |
| mudflat* + nitrous oxide | 31 | 2 | 31/05/2021 |
| mudflat* + N2O | 23 | 1 | 31/05/2021 |
| mudflat* + dinitrogen oxide | 0 | 0 | 31/05/2021 |
| mud flat* + nitrous oxide | 5 | 1 | 31/05/2021 |
| mud flat* + N2O | 3 | 0 | 31/05/2021 |
| mud flat* + dinitrogen oxide | 0 | 0 | 31/05/2021 |
| tidal flat* + nitrous oxide | 25 | 1 | 31/05/2021 |
| tidal flat* + N2O | 16 | 0 | 31/05/2021 |
| tidal flat* + dinitrogen oxide | 0 | 0 | 31/05/2021 |
| realigned saltmarsh + nitrous oxide | 0 | 0 | 31/05/2021 |
| realigned saltmarsh + N2O | 0 | 0 | 31/05/2021 |
| realigned saltmarsh + dinitrogen oxide | 0 | 0 | 31/05/2021 |
| realigned salt marsh + nitrous oxide | 1 | 0 | 31/05/2021 |
| realigned salt marsh + N2O | 0 | 0 | 31/05/2021 |
| realigned salt marsh + dinitrogen oxide | 0 | 0 | 31/05/2021 |
| restored saltmarsh + nitrous oxide | 1 | 0 | 31/05/2021 |
| restored saltmarsh + N2O | 0 | 0 | 31/05/2021 |
| restored saltmarsh + dinitrogen oxide | 0 | 0 | 31/05/2021 |
| restored salt marsh + nitrous oxide | 6 | 1 | 31/05/2021 |
| restored salt marsh + N2O | 4 | 1 | 31/05/2021 |
| restored salt marsh + dinitrogen oxide | 0 | 0 | 31/05/2021 |
| managed saltmarsh + nitrous oxide | 4 | 0 | 31/05/2021 |
| managed saltmarsh + N2O | 2 | 0 | 31/05/2021 |
| managed saltmarsh + dinitrogen oxide | 0 | 0 | 31/05/2021 |
| managed salt marsh + nitrous oxide | 9 | 0 | 31/05/2021 |
| managed salt marsh + N2O | 5 | 0 | 31/05/2021 |
| managed salt marsh + dinitrogen oxide | 0 | 0 | 31/05/2021 |
| **Sulphur compounds** | | | |
| saltmarsh + DMS | 4 | 1 | 01/07/2021 |
| tidal marsh + DMS | 12 | 0 | 01/07/2021 |
| salt marsh + DMS | 51 | 1 | 01/07/2021 |
| saltmarsh + dimethyl sulfide | 4 | 3 | 01/07/2021 |
| tidal marsh + dimethyl sulfide | 13 | 4 | 01/07/2021 |
| salt marsh + dimethyl sulfide | 64 | 10 | 01/07/2021 |
| saltmarsh + dimethylsulfide | 6 | 1 | 01/07/2021 |
| tidal marsh + dimethylsulfide | 4 | 0 | 01/07/2021 |
| salt marsh + dimethylsulfide | 42 | 2 | 01/07/2021 |
| saltmarsh + CH3SCH3 | 0 | 0 | 01/07/2021 |
| tidal marsh + CH3SCH3 | 0 | 0 | 01/07/2021 |
| salt marsh + CH3SCH3 | 0 | 0 | 01/07/2021 |
| saltmarsh + (CH3)2S | 0 | 0 | 01/07/2021 |
| tidal marsh + (CH3)2S | 1 | 0 | 01/07/2021 |
| salt marsh + (CH3)2S | 0 | 0 | 01/07/2021 |
| saltmarsh + methanethiol | 3 | 0 | 01/07/2021 |
| tidal marsh + methanethiol | 1 | 1 | 01/07/2021 |
| salt marsh + methanethiol | 33 | 2 | 01/07/2021 |
| saltmarsh + methyl mercaptan | 0 | 0 | 01/07/2021 |
| tidal marsh + methyl mercaptan | 0 | 0 | 01/07/2021 |
| salt marsh + methyl mercaptan | 2 | 0 | 01/07/2021 |
| saltmarsh + MSH | 0 | 0 | 01/07/2021 |
| tidal marsh + MSH | 0 | 0 | 01/07/2021 |
| salt marsh + MSH | 3 | 0 | 01/07/2021 |
| saltmarsh + MeSH | 66 | 0 | 01/07/2021 |
| tidal marsh + MeSH | 38 | 0 | 01/07/2021 |
| salt marsh + MeSH | 6 | 0 | 01/07/2021 |
| saltmarsh + H2S | 7 | 0 | 01/07/2021 |
| tidal marsh + H2S | 11 | 0 | 01/07/2021 |
| salt marsh + H2S | 66 | 3 | 01/07/2021 |
| saltmarsh + hydrogen sulfide | 8 | 1 | 01/07/2021 |
| tidal marsh + hydrogen sulfide | 26 | 0 | 01/07/2021 |
| salt marsh + hydrogen sulfide | 110 | 4 | 01/07/2021 |
| saltmarsh + hydrogen sulphide | 1 | 0 | 01/07/2021 |
| tidal marsh + hydrogen sulphide | 2 | 0 | 01/07/2021 |
| salt marsh + hydrogen sulphide | 11 | 0 | 01/07/2021 |
| saltmarsh + VOC* | 3 | 0 | 01/07/2021 |
| tidal marsh + VOC* | 13 | 1 | 01/07/2021 |
| salt marsh + VOC* | 14 | 0 | 01/07/2021 |
| saltmarsh + VOSC* | 1 | 0 | 01/07/2021 |
| tidal marsh + VOSC* | 0 | 0 | 01/07/2021 |
| salt marsh + VOSC* | 4 | 0 | 01/07/2021 |
| saltmarsh + VSC* | 0 | 0 | 01/07/2021 |
| tidal marsh + VSC* | 0 | 0 | 01/07/2021 |
| salt marsh + VSC* | 4 | 0 | 01/07/2021 |
| mudflat* + DMS | 1 | 0 | 01/07/2021 |
| mud flat* + DMS | 1 | 0 | 01/07/2021 |
| tidal flat* + DMS | 6 | 0 | 01/07/2021 |
| mudflat* + dimethyl sulfide | 0 | 0 | 01/07/2021 |
| mud flat* + dimethyl sulfide | 0 | 0 | 01/07/2021 |
| tidal flat* + dimethyl sulfide | 6 | 0 | 01/07/2021 |
| mudflat* + dimethylsulfide | 1 | 0 | 01/07/2021 |
| mud flat* + dimethylsulfide | 0 | 0 | 01/07/2021 |
| tidal flat* + dimethylsulfide | 2 | 0 | 01/07/2021 |
| mudflat* + CH3SCH3 | 0 | 0 | 01/07/2021 |
| mud flat* + CH3SCH3 | 0 | 0 | 01/07/2021 |
| tidal flat* + CH3SCH3 | 0 | 0 | 01/07/2021 |
| mudflat* + (CH3)2S | 0 | 0 | 01/07/2021 |
| mud flat* + (CH3)2S | 0 | 0 | 01/07/2021 |
| tidal flat* + (CH3)2S | 0 | 0 | 01/07/2021 |
| mudflat* + methanethiol | 1 | 0 | 01/07/2021 |
| mud flat* + methanethiol | 0 | 0 | 01/07/2021 |
| tidal flat* + methanethiol | 1 | 0 | 01/07/2021 |
| mudflat* + methyl mercaptan | 0 | 0 | 01/07/2021 |
| mud flat* + methyl mercaptan | 0 | 0 | 01/07/2021 |
| tidal flat* + methyl mercaptan | 0 | 0 | 01/07/2021 |
| mudflat* + MSH | 0 | 0 | 01/07/2021 |
| mud flat* + MSH | 0 | 0 | 01/07/2021 |
| tidal flat* + MSH | 0 | 0 | 01/07/2021 |
| mudflat* + MeSH | 17 | 0 | 01/07/2021 |
| mud flat* + MeSH | 16 | 0 | 01/07/2021 |
| tidal flat* + MeSH | 46 | 0 | 01/07/2021 |
| mudflat* + H2S | 5 | 0 | 01/07/2021 |
| mud flat* + H2S | 4 | 0 | 01/07/2021 |
| tidal flat* + H2S | 16 | 0 | 01/07/2021 |
| mudflat* + hydrogen sulfide | 14 | 0 | 01/07/2021 |
| mud flat* + hydrogen sulfide | 8 | 0 | 01/07/2021 |
| tidal flat* + hydrogen sulfide | 21 | 0 | 01/07/2021 |
| mudflat* + hydrogen sulphide | 0 | 0 | 01/07/2021 |
| mud flat* + hydrogen sulphide | 1 | 0 | 01/07/2021 |
| tidal flat* + hydrogen sulphide | 3 | 0 | 01/07/2021 |
| mudflat* + VOC* | 5 | 0 | 01/07/2021 |
| mud flat* + VOC* | 1 | 0 | 01/07/2021 |
| tidal flat* + VOC* | 15 | 0 | 01/07/2021 |
| mudflat* + VOSC* | 0 | 0 | 01/07/2021 |
| mud flat* + VOSC* | 0 | 0 | 01/07/2021 |
| tidal flat* + VOSC* | 0 | 0 | 01/07/2021 |
| mudflat* + VSC* | 0 | 0 | 01/07/2021 |
| mud flat* + VSC* | 0 | 0 | 01/07/2021 |
| tidal flat* + VSC* | 0 | 0 | 01/07/2021 |
| realigned *marsh + DMS | 0 | 0 | 01/07/2021 |
| restored *marsh + DMS | 0 | 0 | 01/07/2021 |
| managed *marsh + DMS | 0 | 0 | 01/07/2021 |
| realigned *marsh + dimethyl sulfide | 0 | 0 | 01/07/2021 |
| restored *marsh + dimethyl sulfide | 0 | 0 | 01/07/2021 |
| managed *marsh + dimethyl sulfide | 0 | 0 | 01/07/2021 |
| realigned *marsh + dimethylsulfide | 0 | 0 | 01/07/2021 |
| restored *marsh + dimethylsulfide | 0 | 0 | 01/07/2021 |
| managed *marsh + dimethylsulfide | 0 | 0 | 01/07/2021 |
| realigned *marsh + CH3SCH3 | 0 | 0 | 01/07/2021 |
| restored *marsh + CH3SCH3 | 0 | 0 | 01/07/2021 |
| managed *marsh + CH3SCH3 | 0 | 0 | 01/07/2021 |
| realigned *marsh + (CH3)2S | 0 | 0 | 01/07/2021 |
| restored *marsh + (CH3)2S | 0 | 0 | 01/07/2021 |
| managed *marsh + (CH3)2S | 0 | 0 | 01/07/2021 |
| realigned *marsh + methanethiol | 0 | 0 | 01/07/2021 |
| restored *marsh + methanethiol | 0 | 0 | 01/07/2021 |
| managed *marsh + methanethiol | 0 | 0 | 01/07/2021 |
| realigned *marsh + methyl mercaptan | 0 | 0 | 01/07/2021 |
| restored *marsh + methyl mercaptan | 0 | 0 | 01/07/2021 |
| managed *marsh + methyl mercaptan | 0 | 0 | 01/07/2021 |
| realigned *marsh + MSH | 0 | 0 | 01/07/2021 |
| restored *marsh + MSH | 0 | 0 | 01/07/2021 |
| managed *marsh + MSH | 0 | 0 | 01/07/2021 |
| realigned *marsh + MeSH | 0 | 0 | 01/07/2021 |
| restored *marsh + MeSH | 5 | 0 | 01/07/2021 |
| managed *marsh + MeSH | 0 | 0 | 01/07/2021 |
| realigned *marsh + H2S | 0 | 0 | 01/07/2021 |
| restored *marsh + H2S | 1 | 1 | 01/07/2021 |
| managed *marsh + H2S | 2 | 0 | 01/07/2021 |
| realigned *marsh + hydrogen sulfide | 0 | 0 | 01/07/2021 |
| restored *marsh + hydrogen sulfide | 5 | 0 | 01/07/2021 |
| managed *marsh + hydrogen sulfide | 0 | 0 | 01/07/2021 |
| realigned *marsh + hydrogen sulphide | 0 | 0 | 01/07/2021 |
| restored *marsh + hydrogen sulphide | 0 | 0 | 01/07/2021 |
| managed *marsh + hydrogen sulphide | 0 | 0 | 01/07/2021 |
| realigned *marsh + VOC* | 0 | 0 | 01/07/2021 |
| restored *marsh + VOC* | 0 | 0 | 01/07/2021 |
| managed *marsh + VOC* | 0 | 0 | 01/07/2021 |
| realigned *marsh + VOSC* | 0 | 0 | 01/07/2021 |
| restored *marsh + VOSC* | 0 | 0 | 01/07/2021 |
| managed *marsh + VOSC* | 0 | 0 | 01/07/2021 |
| realigned *marsh + VSC* | 0 | 0 | 01/07/2021 |
| restored *marsh + VSC* | 0 | 0 | 01/07/2021 |
| managed *marsh + VSC* | 0 | 0 | 01/07/2021 |
| **Terpenes** | | | |
| saltmarsh + isoprene* | 1 | 0 | 01/07/2021 |
| tidal marsh + isoprene* | 2 | 0 | 01/07/2021 |
| salt marsh + isoprene* | 2 | 0 | 01/07/2021 |
| saltmarsh + 2-methyl-1,3-butadiene | 0 | 0 | 01/07/2021 |
| tidal marsh + 2-methyl-1,3-butadiene | 0 | 0 | 01/07/2021 |
| salt marsh + 2-methyl-1,3-butadiene | 0 | 0 | 01/07/2021 |
| saltmarsh + monoterpene* | 0 | 0 | 01/07/2021 |
| tidal marsh + monoterpene* | 0 | 0 | 01/07/2021 |
| salt marsh + monoterpene* | 1 | 0 | 01/07/2021 |
| saltmarsh + sesquiterpene* | 0 | 0 | 01/07/2021 |
| tidal marsh + sesquiterpene* | 0 | 0 | 01/07/2021 |
| salt marsh + sesquiterpene* | 2 | 0 | 01/07/2021 |
| saltmarsh + SLCF* | 0 | 0 | 01/07/2021 |
| tidal marsh + SLCF* | 0 | 0 | 01/07/2021 |
| salt marsh + SLCF* | 0 | 0 | 01/07/2021 |
| saltmarsh + short-lived climate forcer | 0 | 0 | 01/07/2021 |
| tidal marsh + short-lived climate forcer | 0 | 0 | 01/07/2021 |
| salt marsh + short-lived climate forcer | 0 | 0 | 01/07/2021 |
| saltmarsh + NTCF* | 0 | 0 | 01/07/2021 |
| tidal marsh + NTCF* | 0 | 0 | 01/07/2021 |
| salt marsh + NTCF* | 0 | 0 | 01/07/2021 |
| saltmarsh + near-term climate forcer | 0 | 0 | 01/07/2021 |
| tidal marsh + near-term climate forcer | 0 | 0 | 01/07/2021 |
| salt marsh + near-term climate forcer | 0 | 0 | 01/07/2021 |
| mudflat* + isoprene* | 0 | 0 | 01/07/2021 |
| mud flat* + isoprene* | 0 | 0 | 01/07/2021 |
| tidal marsh* + isoprene* | 1 | 0 | 01/07/2021 |
| mudflat* + 2-methyl-1,3-butadiene | 0 | 0 | 01/07/2021 |
| mud flat* + 2-methyl-1,3-butadiene | 0 | 0 | 01/07/2021 |
| tidal marsh* + 2-methyl-1,3-butadiene | 0 | 0 | 01/07/2021 |
| mudflat* + monoterpene* | 0 | 0 | 01/07/2021 |
| mud flat* + monoterpene* | 0 | 0 | 01/07/2021 |
| tidal marsh* + monoterpene* | 0 | 0 | 01/07/2021 |
| mudflat* + sesquiterpene* | 0 | 0 | 01/07/2021 |
| mud flat* + sesquiterpene* | 0 | 0 | 01/07/2021 |
| tidal marsh* + sesquiterpene* | 0 | 0 | 01/07/2021 |
| mudflat* + SLCF* | 0 | 0 | 01/07/2021 |
| mud flat* + SLCF* | 0 | 0 | 01/07/2021 |
| tidal marsh* + SLCF* | 0 | 0 | 01/07/2021 |
| mudflat* + short-lived climate forcer | 0 | 0 | 01/07/2021 |
| mud flat* + short-lived climate forcer | 0 | 0 | 01/07/2021 |
| tidal marsh* + short-lived climate forcer | 0 | 0 | 01/07/2021 |
| mudflat* + NTCF* | 0 | 0 | 01/07/2021 |
| mud flat* + NTCF* | 0 | 0 | 01/07/2021 |
| tidal marsh* + NTCF* | 0 | 0 | 01/07/2021 |
| mudflat* + near-term climate forcer | 0 | 0 | 01/07/2021 |
| mud flat* + near-term climate forcer | 0 | 0 | 01/07/2021 |
| tidal marsh* + near-term climate forcer | 0 | 0 | 01/07/2021 |
| realigned *marsh + isoprene* | 0 | 0 | 01/07/2021 |
| restored *marsh + isoprene* | 0 | 0 | 01/07/2021 |
| managed *marsh + isoprene* | 0 | 0 | 01/07/2021 |
| realigned *marsh + 2-methyl-1,3-butadiene | 0 | 0 | 01/07/2021 |
| restored *marsh + 2-methyl-1,3-butadiene | 0 | 0 | 01/07/2021 |
| managed *marsh + 2-methyl-1,3-butadiene | 0 | 0 | 01/07/2021 |
| realigned *marsh + monoterpene* | 0 | 0 | 01/07/2021 |
| restored *marsh + monoterpene* | 0 | 0 | 01/07/2021 |
| managed *marsh + monoterpene* | 0 | 0 | 01/07/2021 |
| realigned *marsh + sesquiterpene* | 0 | 0 | 01/07/2021 |
| restored *marsh + sesquiterpene* | 0 | 0 | 01/07/2021 |
| managed *marsh + sesquiterpene* | 0 | 0 | 01/07/2021 |
| realigned *marsh + SLCF* | 0 | 0 | 01/07/2021 |
| restored *marsh + SLCF* | 0 | 0 | 01/07/2021 |
| managed *marsh + SLCF* | 0 | 0 | 01/07/2021 |
| realigned *marsh + short-lived climate forcer | 0 | 0 | 01/07/2021 |
| restored *marsh + short-lived climate forcer | 0 | 0 | 01/07/2021 |
| managed *marsh + short-lived climate forcer | 0 | 0 | 01/07/2021 |
| realigned *marsh + NTCF* | 0 | 0 | 01/07/2021 |
| restored *marsh + NTCF* | 0 | 0 | 01/07/2021 |
| managed *marsh + NTCF* | 0 | 0 | 01/07/2021 |
| realigned *marsh + near-term climate forcer | 0 | 0 | 01/07/2021 |
| restored *marsh + near-term climate forcer | 0 | 0 | 01/07/2021 |
| managed *marsh + near-term climate forcer | 0 | 0 | 01/07/2021 |
| **Halocarbons** | | | |
| saltmarsh + methyl halide* | 1 | 1 | 02/07/2021 |
| salt marsh + methyl halide* | 22 | 8 | 02/07/2021 |
| tidal marsh + methyl halide* | 2 | 0 | 02/07/2021 |
| saltmarsh + halocarbon* | 1 | 0 | 02/07/2021 |
| salt marsh + halocarbon* | 9 | 2 | 02/07/2021 |
| tidal marsh + halocarbon* | 2 | 0 | 02/07/2021 |
| saltmarsh + halomethane* | 0 | 0 | 02/07/2021 |
| salt marsh + halomethane* | 17 | 3 | 02/07/2021 |
| tidal marsh + halomethane* | 1 | 0 | 02/07/2021 |
| saltmarsh + methyl iodide | 1 | 0 | 02/07/2021 |
| salt marsh + methyl iodide | 5 | 0 | 02/07/2021 |
| tidal marsh + methyl iodide | 0 | 0 | 02/07/2021 |
| saltmarsh + iodomethane | 0 | 0 | 02/07/2021 |
| salt marsh + iodomethane | 2 | 0 | 02/07/2021 |
| tidal marsh + iodomethane | 1 | 0 | 02/07/2021 |
| saltmarsh + CH3Cl | 0 | 0 | 02/07/2021 |
| salt marsh + CH3Cl | 24 | 1 | 02/07/2021 |
| tidal marsh + CH3Cl | 2 | 0 | 02/07/2021 |
| saltmarsh + methyl bromide | 2 | 0 | 02/07/2021 |
| salt marsh + methyl bromide | 37 | 1 | 02/07/2021 |
| tidal marsh + methyl bromide | 5 | 0 | 02/07/2021 |
| saltmarsh + bromomethane | 0 | 0 | 02/07/2021 |
| salt marsh + bromomethane | 3 | 0 | 02/07/2021 |
| tidal marsh + bromomethane | 1 | 0 | 02/07/2021 |
| saltmarsh + CH3Br | 0 | 0 | 02/07/2021 |
| salt marsh + CH3Br | 21 | 0 | 02/07/2021 |
| tidal marsh + CH3Br | 3 | 0 | 02/07/2021 |
| saltmarsh + methyl chloride | 2 | 0 | 02/07/2021 |
| salt marsh + methyl chloride | 35 | 0 | 02/07/2021 |
| tidal marsh + methyl chloride | 3 | 0 | 02/07/2021 |
| saltmarsh + chloromethane | 0 | 0 | 02/07/2021 |
| salt marsh + chloromethane | 8 | 0 | 02/07/2021 |
| tidal marsh + chloromethane | 1 | 0 | 02/07/2021 |
| saltmarsh + CH3I | 0 | 0 | 02/07/2021 |
| salt marsh + CH3I | 6 | 0 | 02/07/2021 |
| tidal marsh + CH3I | 1 | 0 | 02/07/2021 |
| saltmarsh + chloroform | 3 | 1 | 02/07/2021 |
| salt marsh + chloroform | 21 | 2 | 02/07/2021 |
| tidal marsh + chloroform | 7 | 0 | 02/07/2021 |
| saltmarsh + CHCl3 | 1 | 0 | 02/07/2021 |
| salt marsh + CHCl3 | 5 | 0 | 02/07/2021 |
| tidal marsh + CHCl3 | 3 | 0 | 02/07/2021 |
| saltmarsh + trichloromethane | 0 | 0 | 02/07/2021 |
| salt marsh + trichloromethane | 2 | 0 | 02/07/2021 |
| tidal marsh + trichloromethane | 0 | 0 | 02/07/2021 |
| mudflat* + methyl halide* | 4 | 0 | 02/07/2021 |
| mud flat* + methyl halide* | 0 | 0 | 02/07/2021 |
| tidal flat + methyl halide* | 1 | 0 | 02/07/2021 |
| mudflat* + halocarbon* | 1 | 0 | 02/07/2021 |
| mud flat* + halocarbon* | 0 | 0 | 02/07/2021 |
| tidal flat + halocarbon* | 0 | 0 | 02/07/2021 |
| mudflat* + halomethane* | 3 | 0 | 02/07/2021 |
| mud flat* + halomethane* | 0 | 0 | 02/07/2021 |
| tidal flat + halomethane* | 0 | 0 | 02/07/2021 |
| mudflat* + methyl iodide | 1 | 0 | 02/07/2021 |
| mud flat* + methyl iodide | 0 | 0 | 02/07/2021 |
| tidal flat + methyl iodide | 0 | 0 | 02/07/2021 |
| mudflat* + iodomethane | 0 | 0 | 02/07/2021 |
| mud flat* + iodomethane | 0 | 0 | 02/07/2021 |
| tidal flat + iodomethane | 0 | 0 | 02/07/2021 |
| mudflat* + CH3Cl | 4 | 0 | 02/07/2021 |
| mud flat* + CH3Cl | 0 | 0 | 02/07/2021 |
| tidal flat + CH3Cl | 0 | 0 | 02/07/2021 |
| mudflat* + methyl bromide | 5 | 0 | 02/07/2021 |
| mud flat* + methyl bromide | 0 | 0 | 02/07/2021 |
| tidal flat + methyl bromide | 1 | 0 | 02/07/2021 |
| mudflat* + bromomethane | 0 | 0 | 02/07/2021 |
| mud flat* + bromomethane | 0 | 0 | 02/07/2021 |
| tidal flat + bromomethane | 0 | 0 | 02/07/2021 |
| mudflat* + CH3Br | 2 | 0 | 02/07/2021 |
| mud flat* + CH3Br | 0 | 0 | 02/07/2021 |
| tidal flat + CH3Br | 0 | 0 | 02/07/2021 |
| mudflat* + methyl chloride | 5 | 0 | 02/07/2021 |
| mud flat* + methyl chloride | 1 | 0 | 02/07/2021 |
| tidal flat + methyl chloride | 1 | 0 | 02/07/2021 |
| mudflat* + chloromethane | 1 | 0 | 02/07/2021 |
| mud flat* + chloromethane | 0 | 0 | 02/07/2021 |
| tidal flat + chloromethane | 0 | 0 | 02/07/2021 |
| mudflat* + CH3I | 1 | 0 | 02/07/2021 |
| mud flat* + CH3I | 0 | 0 | 02/07/2021 |
| tidal flat + CH3I | 0 | 0 | 02/07/2021 |
| mudflat* + chloroform | 2 | 0 | 02/07/2021 |
| mud flat* + chloroform | 0 | 0 | 02/07/2021 |
| tidal flat + chloroform | 1 | 0 | 02/07/2021 |
| mudflat* + CHCl3 | 0 | 0 | 02/07/2021 |
| mud flat* + CHCl3 | 0 | 0 | 02/07/2021 |
| tidal flat + CHCl3 | 1 | 0 | 02/07/2021 |
| mudflat* + trichloromethane | 0 | 0 | 02/07/2021 |
| mud flat* + trichloromethane | 0 | 0 | 02/07/2021 |
| tidal flat + trichloromethane | 0 | 0 | 02/07/2021 |
| realigned *marsh + methyl halide* | 0 | 0 | 02/07/2021 |
| restored *marsh + methyl halide* | 0 | 0 | 02/07/2021 |
| managed *marsh + methyl halide* | 0 | 0 | 02/07/2021 |
| realigned *marsh + halocarbon* | 0 | 0 | 02/07/2021 |
| restored *marsh + halocarbon* | 0 | 0 | 02/07/2021 |
| managed *marsh + halocarbon* | 0 | 0 | 02/07/2021 |
| realigned *marsh + halomethane* | 0 | 0 | 02/07/2021 |
| restored *marsh + halomethane* | 0 | 0 | 02/07/2021 |
| managed *marsh + halomethane* | 0 | 0 | 02/07/2021 |
| realigned *marsh + methyl iodide | 0 | 0 | 02/07/2021 |
| restored *marsh + methyl iodide | 0 | 0 | 02/07/2021 |
| managed *marsh + methyl iodide | 0 | 0 | 02/07/2021 |
| realigned *marsh + iodomethane | 0 | 0 | 02/07/2021 |
| restored *marsh + iodomethane | 0 | 0 | 02/07/2021 |
| managed *marsh + iodomethane | 0 | 0 | 02/07/2021 |
| realigned *marsh + CH3Cl | 0 | 0 | 02/07/2021 |
| restored *marsh + CH3Cl | 0 | 0 | 02/07/2021 |
| managed *marsh + CH3Cl | 0 | 0 | 02/07/2021 |
| realigned *marsh + methyl bromide | 0 | 0 | 02/07/2021 |
| restored *marsh + methyl bromide | 0 | 0 | 02/07/2021 |
| managed *marsh + methyl bromide | 0 | 0 | 02/07/2021 |
| realigned *marsh + bromomethane | 0 | 0 | 02/07/2021 |
| restored *marsh + bromomethane | 0 | 0 | 02/07/2021 |
| managed *marsh + bromomethane | 0 | 0 | 02/07/2021 |
| realigned *marsh + CH3Br | 0 | 0 | 02/07/2021 |
| restored *marsh + CH3Br | 0 | 0 | 02/07/2021 |
| managed *marsh + CH3Br | 0 | 0 | 02/07/2021 |
| realigned *marsh + methyl chloride | 0 | 0 | 02/07/2021 |
| restored *marsh + methyl chloride | 0 | 0 | 02/07/2021 |
| managed *marsh + methyl chloride | 0 | 0 | 02/07/2021 |
| realigned *marsh + chloromethane | 0 | 0 | 02/07/2021 |
| restored *marsh + chloromethane | 0 | 0 | 02/07/2021 |
| managed *marsh + chloromethane | 0 | 0 | 02/07/2021 |
| realigned *marsh + CH3I | 0 | 0 | 02/07/2021 |
| restored *marsh + CH3I | 0 | 0 | 02/07/2021 |
| managed *marsh + CH3I | 0 | 0 | 02/07/2021 |
| realigned *marsh + chloroform | 0 | 0 | 02/07/2021 |
| restored *marsh + chloroform | 1 | 0 | 02/07/2021 |
| managed *marsh + chloroform | 1 | 0 | 02/07/2021 |
| realigned *marsh + CHCl3 | 0 | 0 | 02/07/2021 |
| restored *marsh + CHCl3 | 0 | 0 | 02/07/2021 |
| managed *marsh + CHCl3 | 1 | 0 | 02/07/2021 |
| realigned *marsh + trichloromethane | 0 | 0 | 02/07/2021 |
| restored *marsh + trichloromethane | 0 | 0 | 02/07/2021 |
| managed *marsh + trichloromethane | 0 | 0 | 02/07/2021 |

**Table S2** Data collected from identified studies. For realignment stages, USM refers to unaltered saltmarsh, RSM refers to realigned saltmarsh, and MF refers to mudflat. Data is organised by alphabetically according to reference for each climate forcer and realignment stage. If data was not available in a paper, it is indicated by a dash (-).

| **Reference** | **Realignment stage** | **Coordinates** | **Country** | **Mean CAR/emission**  **(g m-2 yr-1)** | **Measurement method** | **Dominant halophyte species/genera** | **Mean annual temperature (oC)** | **Mean annual precipitation (mm)** | **Salinity (g/kg)** |
| --- | --- | --- | --- | --- | --- | --- | --- | --- | --- |
| **Carbon burial** | | | | | | | | | |
| Andersen *et al.*, (2011) | USM | 55.50, 8.30 | Denmark | 52.80 | 137Cs | P. maritima | 8.2 | - | - |
| Andrews *et al*., (2008) | USM | 53.70, -0.10 | UK | 793.00 | 137Cs | Puccinellia spp. | 9.9 | - | - |
| Andrews *et al*., (2008) | USM | 53.70, -0.10 | UK | 1133.00 | 137Cs | Spartina spp. | 9.9 | - | - |
| Anisfeld *et al*., (1999); Anisfeld (1995) | USM | 41.15, -72.48 | USA | 136.00 | 137Cs | S. alterniflora | 10.3 | - | - |
| Anisfeld *et al*., (1999); Anisfeld (1995) | USM | 41.15, -72.44 | USA | 154.00 | 137Cs | S. alterniflora, S. patens | 10.3 | - | - |
| Anisfeld *et al*., (1999); Anisfeld (1995) | USM | 41.15, -72.44 | USA | 169.00 | 137Cs | S. alterniflora, S. patens | 10.3 | - | - |
| Anisfeld *et al*., (1999); Anisfeld (1995) | USM | 41.15, -72.44 | USA | 114.00 | 137Cs | S. alterniflora, S. patens | 10.3 | - | - |
| Anisfeld *et al*., (1999); Anisfeld (1995) | USM | 41.16, -72.39 | USA | 134.00 | 137Cs | S. patens | 10.3 | - | - |
| Anisfeld *et al*., (1999); Anisfeld (1995) | USM | 41.16, -72.39 | USA | 204.00 | 137Cs | S. alterniflora | 10.3 | - | - |
| Anisfeld *et al*., (1999); Anisfeld (1995) | USM | 41.16, -72.4 | USA | 99.00 | 137Cs | D. spicata, S. patens, S. alterniflora | 10.3 | - | - |
| Anisfeld *et al*., (1999); Anisfeld (1995) | USM | 41.16, -72.4 | USA | 85.00 | 137Cs | D. spicata, S. patens, S. alterniflora | 10.3 | - | - |
| Anisfeld *et al*., (1999); Anisfeld (1995) | USM | 41.15, -72.42 | USA | 153.00 | 137Cs | D. spicata, S. europea, S. patens | 10.3 | - | - |
| Anisfeld *et al*., (1999); Anisfeld (1995) | USM | 41.15, -72.42 | USA | 93.00 | 137Cs | D. spicata, S. europea, S. patens | 10.3 | - | - |
| Anisfeld *et al*., (1999); Anisfeld (1995) | USM | 41.15, -72.48 | USA | 72.00 | 137Cs | P. australis, S. patens | 10.3 | - | - |
| Anisfeld *et al*., (1999); Anisfeld (1995) | USM | 41.15, -72.48 | USA | 116.00 | 137Cs | P. australis, S. patens | 10.3 | - | - |
| Arriola and Cable, (2017) | USM | 30.04, -83.57 | USA | 109.50 | %C concentration x sediment accumulation rate | J. roemerianus, S. alterniflora | - | 1500 | - |
| Arriola and Cable, (2017) | USM | 30.04, -83.57 | USA | 95.70 | %C concentration x sediment accumulation rate | J. roemerianus, S. alterniflora | - | 1500 | - |
| Arriola and Cable, (2017) | USM | 30.04, -83.57 | USA | 49.50 | %C concentration x sediment accumulation rate | J. roemerianus, S. alterniflora | - | 1500 | - |
| Arriola and Cable, (2017) | USM | 30.04, -83.57 | USA | 65.20 | %C concentration x sediment accumulation rate | J. roemerianus, S. alterniflora | - | 1500 | - |
| Cahoon, (1993) (From Chmura et al., (2003)) | USM | 32.60, -117.10 | USA | 43.00 | - | - | 17.6 | - | - |
| Cahoon and Lynch, (1993) (From Chmura et al., (2003)) | USM | 30.10, -84.20 | USA | 44.00 | Formula Craft *et al.*, (1991) | - | 19.9 | - | - |
| Cahoon and Lynch, (1993) (From Chmura et al., (2003)) | USM | 35.00, -76.40 | USA | 70.00 | - | - | 17.0 | - | - |
| Cahoon *et al.*, (1996) | USM | 32.50, -117.10 | USA | 343.00 | Loss on ignition | S. foliosa, S. subterminalis | 17.6 | - | - |
| Cahoon *et al.*, (1996) | USM | 54.30, 14.60 | Poland | 148.00 | 137Cs | P. communis | 8.7 | - | - |
| Cahoon *et al.*, (1996) | USM | 54.30, 14.60 | Poland | 107.00 | 137Cs | P. communis | 8.7 | - | - |
| Cahoon *et al.*, (1996) | USM | 54.30, 18.90 | Poland | 381.00 | 137Cs | P. communis | 8.3 | - | - |
| Cahoon *et al.*, (1996) | USM | 54.30, 18.90 | Poland | 254.00 | 137Cs | P. communis | 8.3 | - | - |
| Cahoon *et al.*, (1996) | USM | 51.50, 4.10 | Netherlands | 277.00 | 137Cs | S. anglica | - | - | - |
| Cahoon *et al.*, (1996) | USM | 51.50, 4.10 | Netherlands | 139.00 | 137Cs | S. anglica | - | - | - |
| Cahoon *et al.*, (1996) | USM | 51.70, 0.90 | UK | 187.00 | 137Cs | H. portulacoides | 10.1 | - | - |
| Cahoon *et al.*, (1996) | USM | 51.70, 0.90 | UK | 139.00 | 137Cs | H. portulacoides | 10.1 | - | - |
| Cahoon *et al.*, (1996) | USM | 51.70, 0.90 | UK | 159.00 | 137Cs | H. portulacoides | 10.1 | - | - |
| Cahoon *et al.*, (1996) | USM | 51.70, 0.90 | UK | 110.00 | 137Cs | H. portulacoides | 10.1 | - | - |
| Callaway *et al.,* (1997) | USM | 30.40, -88.90 | USA | 153.00 | 137Cs | S. alterniflora, S. patens | 19.7 | - | - |
| Callaway *et al.,* (2012) | USM | 38.04, -121.86 | USA | 158.40 | 137Cs | S. acutus, S. californicus, D. spicata, T. domingensis, T. maritima | - | - | Oligohaline |
| Callaway *et al.,* (2012) | USM | 38.04, -121.86 | USA | 157.90 | 137Cs | S. acutus, S. californicus, D. spicata, T. domingensis, T. maritima | - | - | Oligohaline |
| Callaway *et al.,* (2012) | USM | 38.04, -121.86 | USA | 151.80 | 137Cs | S. acutus, S. californicus, D. spicata, T. domingensis, T. maritima | - | - | Oligohaline |
| Callaway *et al.,* (2012) | USM | 38.18, -122.03 | USA | 96.70 | 137Cs | S. acutus, S. californicus, S. americanus, J. balticus, D. spicata, S. pacifica, G. stricta | - | - | Mesohaline |
| Callaway *et al.,* (2012) | USM | 38.18, -122.03 | USA | 117.90 | 137Cs | S. acutus, S. californicus, S. americanus, J. balticus, D. spicata, S. pacifica, G. stricta | - | - | Mesohaline |
| Callaway *et al.,* (2012) | USM | 38.18, -122.03 | USA | 100.30 | 137Cs | S. acutus, S. californicus, S. americanus, J. balticus, D. spicata, S. pacifica, G. stricta | - | - | Mesohaline |
| Callaway *et al.,* (2012) | USM | 38.19, -122.33 | USA | 187.50 | 137Cs | S. foliosa, S. pacifica, B. maritimus, S. americanus, D. spicata, G. stricta | - | - | Polyhaline |
| Callaway *et al.,* (2012) | USM | 38.19, -122.33 | USA | 52.30 | 137Cs | S. foliosa, S. pacifica, B. maritimus, S. americanus, D. spicata, G. stricta | - | - | Polyhaline |
| Callaway *et al.,* (2012) | USM | 38.19, -122.33 | USA | 89.60 | 137Cs | S. foliosa, S. pacifica, B. maritimus, S. americanus, D. spicata, G. stricta | - | - | Polyhaline |
| Callaway *et al.,* (2012) | USM | 38.15, -122.54 | USA | 87.70 | 137Cs | S. foliosa, S. pacifica, C. salina, J. carnosa, D. spicata, F. salina | - | - | Polyhaline/Hyperhaline |
| Callaway *et al.,* (2012) | USM | 38.15, -122.54 | USA | 66.20 | 137Cs | S. foliosa, S. pacifica, C. salina, J. carnosa, D. spicata, F. salina | - | - | Polyhaline/Hyperhaline |
| Callaway *et al.,* (2012) | USM | 38.15, -122.54 | USA | 58.70 | 137Cs | S. foliosa, S. pacifica, C. salina, J. carnosa, D. spicata, F. salina | - | - | Polyhaline/Hyperhaline |
| Callaway *et al.,* (2012) | USM | 38.00, -122.48 | USA | 141.90 | 137Cs | S. foliosa, S. pacifica, G. stricta, D. spicata, C. salina | - | - | Polyhaline/Hyperhaline |
| Callaway *et al.,* (2012) | USM | 38.00, -122.48 | USA | 79.80 | 137Cs | S. foliosa, S. pacifica, G. stricta, D. spicata, C. salina | - | - | Polyhaline/Hyperhaline |
| Callaway *et al.,* (2012) | USM | 38.00, -122.48 | USA | 87.00 | 137Cs | S. foliosa, S. pacifica, G. stricta, D. spicata, C. salina | - | - | Polyhaline/Hyperhaline |
| Callaway *et al.,* (2012) | USM | 37.58, -122.1 | USA | 146.70 | 137Cs | S. foliosa, S. pacifica | - | - | Polyhaline/Hyperhaline |
| Callaway *et al.,* (2012) | USM | 37.58, -122.1 | USA | 117.90 | 137Cs | S. foliosa, S. pacifica | - | - | Polyhaline/Hyperhaline |
| Callaway *et al.,* (2012) | USM | 37.58, -122.1 | USA | 102.50 | 137Cs | S. foliosa, S. pacifica | - | - | Polyhaline/Hyperhaline |
| Champlin *et al.,* (2020) | USM | 39.14, -75.60 | USA | 230.00 | Feldspar marker beds with SET | - | - | - | - |
| Champlin *et al.,* (2020) | USM | 39.14, -75.60 | USA | 104.00 | Feldspar marker beds with SET | - | - | - | - |
| Champlin *et al.,* (2020) | USM | 39.10, -74.51 | USA | 186.00 | Feldspar marker beds with SET | - | - | - | - |
| Champlin *et al.,* (2020) | USM | 39.10, -74.51 | USA | 104.00 | Feldspar marker beds with SET | - | - | - | - |
| Champlin *et al.,* (2020) | USM | 39.50, -75.26 | USA | 88.00 | Feldspar marker beds with SET | - | - | - | - |
| Champlin *et al.,* (2020) | USM | 39.50, -75.26 | USA | 269.00 | Feldspar marker beds with SET | - | - | - | - |
| Champlin *et al.,* (2020) | USM | 39.15, -74.59 | USA | 207.00 | Feldspar marker beds with SET | - | - | - | - |
| Champlin *et al.,* (2020) | USM | 39.15, -74.59 | USA | 151.00 | Feldspar marker beds with SET | - | - | - | - |
| Champlin *et al.,* (2020) | USM | 40.10, -74.50 | USA | 124.00 | Feldspar marker beds with SET | - | - | - | - |
| Champlin *et al.,* (2020) | USM | 40.10, -74.50 | USA | 92.00 | Feldspar marker beds with SET | - | - | - | - |
| Champlin *et al.,* (2020) | USM | 39.47, -74.60 | USA | 141.00 | Feldspar marker beds with SET | - | - | - | - |
| Champlin *et al.,* (2020) | USM | 39.47, -74.60 | USA | 101.00 | Feldspar marker beds with SET | - | - | - | - |
| Champlin *et al.,* (2020) | USM | 39.37, -74.15 | USA | 211.00 | Feldspar marker beds with SET | - | - | - | - |
| Champlin *et al.,* (2020) | USM | 39.37, -74.15 | USA | 198.00 | Feldspar marker beds with SET | - | - | - | - |
| Chmura, (1997) (From Chmura et al., (2003)) | USM | 45.10, -67.00 | Canada | 456.00 | - | - | 4.8 | - | - |
| Chmura, (1997) (From Chmura et al., (2003)) | USM | 45.10, -67.00 | Canada | 113.00 | - | - | 4.8 | - | - |
| Chmura, (1997) (From Chmura et al., (2003)) | USM | 45.10, -66.40 | Canada | 445.00 | - | - | 4.8 | - | - |
| Chmura, (1997) (From Chmura et al., (2003)) | USM | 45.10, -66.40 | Canada | 94.00 | - | - | 4.8 | - | - |
| Chmura, (1997) (From Chmura et al., (2003)) | USM | 45.60, -64.80 | Canada | 582.00 | - | - | 4.8 | - | - |
| Chmura, (1997) (From Chmura et al., (2003)) | USM | 45.60, -64.80 | Canada | 186.00 | - | - | 4.8 | - | - |
| Chmura, (1997) (From Chmura et al., (2003)) | USM | 45.20, -66.20 | Canada | 277.00 | - | - | 4.8 | - | - |
| Chmura, (1997) (From Chmura et al., (2003)) | USM | 45.20, -66.20 | Canada | 330.00 | - | - | 4.8 | - | - |
| Chmura, (1997) (From Chmura et al., (2003)) | USM | 45.30, -65.60 | Canada | 265.00 | - | - | 4.8 | - | - |
| Chmura, (1997) (From Chmura et al., (2003)) | USM | 45.90, -65.50 | Canada | 928.00 | - | - | 4.8 | - | - |
| Chmura, (1997) (From Chmura et al., (2003)) | USM | 45.80, -64.40 | Canada | 264.00 | - | - | 4.8 | - | - |
| Chmura, (1997) (From Chmura et al., (2003)) | USM | 45.80, -64.40 | Canada | 253.00 | - | - | 4.8 | - | - |
| Choi and Wang, (2004) | USM | 30.05, -84.10 | USA | 117.00 | 14C isotopic analysis | J. roemerinus | - | - | - |
| Choi and Wang, (2004) | USM | 30.05, -84.10 | USA | 101.00 | 14C isotopic analysis | J. roemerinus | - | - | - |
| Choi and Wang, (2004) | USM | 30.05, -84.10 | USA | 65.00 | 14C isotopic analysis | J. roemerinus | - | - | - |
| Connor *et al., (*2001) | USM | 45.83, -64.47 | Canada | 39.00 | Loss on ignition | - | - | - | - |
| Connor *et al., (*2001) | USM | 45.83, -64.47 | Canada | 194.00 | Loss on ignition | - | - | - | - |
| Connor *et al., (*2001) | USM | 45.06, -66.27 | Canada | 76.00 | Loss on ignition | - | - | - | - |
| Connor *et al., (*2001) | USM | 45.06, -66.27 | Canada | 188.00 | Loss on ignition | - | - | - | - |
| Craft, (2007) | USM | 31.32, -81.15 | USA | 32.00 | 137Cs | S. alterniflora, J. roemerianus | - | - | 22 |
| Craft, (2007) | USM | 31.24, -81.18 | USA | 21.00 | 137Cs | S. alterniflora | - | - | 24.5 |
| Craft *et al., (*1993) | USM | 35.90, -75.60 | USA | 59.00 | 137Cs | S. alterniflora | 16.6 | - | 20-35 |
| Craft *et al., (*1993) | USM | 35.90, -75.60 | USA | 21.00 | 137Cs | S. alterniflora | 16.6 | - | 21-35 |
| Craft *et al., (*1993) | USM | 35.30, -76.80 | USA | 146.00 | 137Cs | J. roemerianus, D. spicata, S. patens, S. cynosuroides | 16.6 | - | 0 - 15 |
| Craft *et al., (*1993) | USM | 35.30, -76.80 | USA | 107.00 | 137Cs | J. roemerianus, D. spicata, S. patens, S. cynosuroides | 16.6 | - | 1-15 |
| Craft *et al.*, (1999) | USM | 34.41, -76.48 | USA | 115.00 | SOC monitoring | S. alterniflora | - | - | 25-36 |
| Craft *et al.*, (1999) | USM | 34.03, -77.55 | USA | 159.00 | SOC monitoring | S. alterniflora | - | - | 7-10 |
| Craft *et al.,* (2003) | USM | 34.70, -76.75 | USA | 33.00 | 137Cs / 210Pb | S. alterniflora | - | - | 20-31 |
| Craft *et al.,* (2003) | USM | 33.87, -77.97 | USA | 43.00 | 137Cs / 210Pb | S. alterniflora | - | - | 17-33 |
| Craft *et al.,* (2003) | USM | 33.92, -78.22 | USA | 30.00 | 137Cs / 210Pb | S. alterniflora | - | - | 18-31 |
| Craft *et al.,* (2003) | USM | 34.40, -77.07 | USA | 110.00 | 137Cs / 210Pb | S. alterniflora | - | - | 20-31 |
| Craft *et al.,* (2003) | USM | 33.92, -78.25 | USA | 1.00 | 137Cs / 210Pb | S. alterniflora | - | - | 14-34 |
| Craft *et al.,* (2003) | USM | 33.92, -77.94 | USA | 7.50 | 137Cs / 210Pb | S. alterniflora | - | - | 20-31 |
| Craft *et al.,* (2003) | USM | 34.03, -77.54 | USA | 77.00 | 137Cs / 210Pb | S. alterniflora | - | - | 5-21 |
| Cuellar-Martinez *et al., (*2019) | USM | 30.27, -116.00 | USA | 29.70 | 210Pb | S. foliosa, B. maritima, Salicornia spp., Suaeda spp. | 16.2 | 162 | - |
| Cuellar-Martinez *et al., (*2019) | USM | 30.27, -116.00 | USA | 42.20 | 210Pb | S. foliosa, B. maritima, Salicornia spp., Suaeda spp. | 16.2 | 162 | - |
| Curado *et al.,* (2013) | USM | 37.20, -6.90 | Spain | 356.60 | - | S. maritima | 18.1 | - | - |
| Dong *et al., (*2020) | USM | 30.99, 121.94 | China | 794.00 | Emission + SOC | S. alterniflora | 15.3 | 1022 | - |
| Drake *et al.,* (2015) | USM | 43.19, -70.34 | USA | 51.00 | 137Cs | S. alterniflora, S. patens | - | - | 28 |
| Drake *et al.,* (2015) | USM | 42.46, -70.48 | USA | 87.00 | 137Cs | B halimifolia, D. spcata, P. australis, S. alterniflora, S. patens | - | - | 20 |
| Drake *et al.,* (2015) | USM | 40.46, -72.53 | USA | 93.00 | 137Cs | B. halimifolia, P. australis, S. alterniflora, S. patens | - | - | 12 |
| Drake *et al.,* (2015) | USM | 39.32, -74.25 | USA | 67.00 | 137Cs | I. frutescens, S. alterniflora, S. patens | - | - | 18 |
| Drexler *et al.,* (2019) | USM | 47.40, -122.42 | USA | 134.00 | 210Pb | C. lyngbyei, J. balticus, P. anserine | 15.0 | 1000 | Polyhaline |
| Elschot *et al.,* (2015) | USM | 53.30, 6.10 | Netherlands | 126.00 | Soil redox | P. maritima, L vulgare | - | - | - |
| Elschot *et al.,* (2015) | USM | 53.30, 6.10 | Netherlands | 83.00 | Soil redox | P. maritima, L vulgare | - | - | - |
| Elschot *et al.,* (2015) | USM | 53.30, 6.10 | Netherlands | 69.00 | Soil redox | P. maritima, L vulgare | - | - | - |
| Elsey-Quirk *et al.,* (2011) | USM | 38.25, -75.04 | USA | 154.00 | 210Pb | S. alterniflora | 22.0 | - | 24 |
| Elsey-Quirk *et al.,* (2011) | USM | 38.25, -75.04 | USA | 119.00 | 210Pb | J. roemerianus | 22.0 | - | 24 |
| Fennessy *et al.,* (2019) | USM | 40.43, 0.20 | Spain | 297.00 | %C concentration x sediment accumulation rate | P. australis | - | - | 15.19 |
| Fennessy *et al.,* (2019) | USM | 40.43, 0.42 | Spain | 142.00 | %C concentration x sediment accumulation rate | C. mariscus | - | - | 5.06 |
| Fennessy *et al.,* (2019) | USM | 40.43, 0.42 | Spain | 293.00 | %C concentration x sediment accumulation rate | P. australis | - | - | 3.16 |
| Fennessy *et al.,* (2019) | USM | 40.43, 0.42 | Spain | 226.00 | %C concentration x sediment accumulation rate | P. australis, J. maritimus | - | - | 11.87 |
| Fennessy *et al.,* (2019) | USM | 40.43, 0.42 | Spain | 32.00 | %C concentration x sediment accumulation rate | P. australis, S. fructicosa | - | - | 20.39 |
| Fennessy *et al.,* (2019) | USM | 40.43, 0.42 | Spain | 219.00 | %C concentration x sediment accumulation rate | P.australis | - | - | 17.19 |
| Fennessy *et al.,* (2019) | USM | 40.43, 0.42 | Spain | 99.00 | %C concentration x sediment accumulation rate | P. australis, J. maritimus | - | - | 9.92 |
| Fennessy *et al.,* (2019) | USM | 40.43, 0.42 | Spain | 324.00 | %C concentration x sediment accumulation rate | P. australis, S. maritimus | - | - | 10.99 |
| Fennessy *et al.,* (2019) | USM | 40.43, 0.42 | Spain | 53.00 | %C concentration x sediment accumulation rate | S. fruticosa | - | - | 29.64 |
| Fennessy *et al.,* (2019) | USM | 40.43, 0.42 | Spain | 49.00 | %C concentration x sediment accumulation rate | S. fruticosa | - | - | 46.96 |
| Fennessy *et al.,* (2019) | USM | 40.43, 0.42 | Spain | 39.00 | %C concentration x sediment accumulation rate | S. fruticosa | - | - | 39.36 |
| Fennessy *et al.,* (2019) | USM | 40.43, 0.42 | Spain | 272.00 | %C concentration x sediment accumulation rate | S. fruticosa | - | - | 29.54 |
| Fennessy *et al.,* (2019) | USM | 40.43, 0.42 | Spain | 435.00 | %C concentration x sediment accumulation rate | S. fruticosa | - | - | 36.4 |
| Fennessy *et al.,* (2019) | USM | 40.43, 0.42 | Spain | 395.00 | %C concentration x sediment accumulation rate | S. fruticosa | - | - | 31.15 |
| Forbrich *et al.,* (2018) | USM | 42.42, -70.48 | USA | 112.00 | 137Cs | S. patens, D. spicata, S. alterniflora | 8.7 | 1269 | - |
| French and Spencer, (1993) | USM | 53.00, 8.40 | UK | 165.00 | - | - | - | - | - |
| French and Spencer, (1993) | USM | 53.00, 8.40 | UK | 77.00 | - | - | - | - | - |
| Gao *et al.,* (2012) | USM | 33.32, 120.33 | China | 243.40 | 137Cs | S. alterniflora | - | - | - |
| Gao *et al.,* (2012) | USM | 33.32, 120.33 | China | 123.89 | 137Cs | S. salsa | - | - | - |
| Gao *et al.,* (2012) | USM | 33.32, 120.33 | China | 28.80 | 137Cs | P. australis | - | - | - |
| Gao *et al.,* (2016) | USM | 33.17, 120.77 | China | 470.00 | - | S. alterniflora | 14.4 | 1087.8 | - |
| Gonneea *et al., (*2019) | USM | 41.50, -70.50 | USA | 129.00 | 210Pb | S. alterniflora | - | - | - |
| Gonneea *et al., (*2019) | USM | 41.50, -70.50 | USA | 66.00 | 210Pb | S. patens, J. geradii, D. spicata | - | - | - |
| He *et al., (*2016) | USM | 31.19, -81.19 | USA | 359.00 | SOC monitoring | S. alterniflora | - | - | 15-20 |
| Howe *et al.,* (2009) | USM | -32.51, 151.43 | Australia | 137.00 | Feldspare marker horizons with SET | S. quinqueflora, S. virginicus | - | - | - |
| Howe *et al.,* (2009) | USM | -32.51, 151.43 | Australia | 64.00 | Feldspare marker horizons with SET | S. quinqueflora, S. virginicus | - | - | - |
| Howes *et al.,* (1985) | USM | 41.60, 70.00 | USA | 88.80 | 14C isotopic analysis | S. alterniflora | 10.2 | - | - |
| Jensen *et al.,* (2006) | USM | 69.40, -52.00 | Greenland | 30.00 | 210Pb | P. phyryaganodes | -4.0 | 175 | - |
| Jimenez-Arias *et al*., (2020) | USM | 36.49, -6.21 | Spain | 79.91 | %C concentration x sediment accumulation rate | S. maritima | - | - | - |
| Jimenez-Arias *et al*., (2020) | USM | 36.49, -6.21 | Spain | 47.64 | %C concentration x sediment accumulation rate | S. maritima | - | - | - |
| Jones *et al.,* (2017) | USM | 32.08, -81.07 | USA | 96.90 | %C concentration x sediment accumulation rate | T. latifolia, S. cynosuroides, S. robustus, S. montevidensis | - | - | 3.27-7.36 |
| Jones *et al.,* (2017) | USM | 33.20, -79.20 | USA | 74.10 | %C concentration x sediment accumulation rate | - | - | - | 1.32-5.48 |
| Kelleway *et al.,* (2017) | USM | -36.36, 150.00 | Australia | 80.00 | 210Pb | S. quinqueflora | - | - | - |
| Kelleway *et al.,* (2017) | USM | -36.36, 150.00 | Australia | 80.00 | 210Pb | S. quinqueflora | - | - | - |
| Kelleway *et al.,* (2017) | USM | -32.40, 152.09 | Australia | 30.00 | 210Pb | S. virginicus | - | - | - |
| Kelleway *et al.,* (2017) | USM | -32.40, 152.09 | Australia | 80.00 | 210Pb | S. virginicus | - | - | - |
| Krull and Craft, (2009) | USM | 31.19, -81.20 | USA | 35.20 | SOC monitoring | S. alterniflora | - | - | 14-32 |
| Loomis and Craft, (2010) | USM | 31.30, -81.70 | USA | 48.20 | 137Cs | S. alterniflora | 20.3 | - | - |
| Loomis and Craft, (2010) | USM | 31.40, -81.40 | USA | 26.50 | 137Cs | S. alterniflora | 19.8 | - | - |
| Loomis and Craft, (2010) | USM | 31.90, -81.20 | USA | 42.90 | 137Cs | S. alterniflora | 19.9 | - | - |
| McTigue *et al., (*2019) | USM | 34.34, -77.20 | USA | 167.00 | SOC monitoring | S. alterniflora, J. roemerianus | - | - | - |
| Oenema and DeLaune, (1988) | USM | 51.50, 4.10 | Netherlands | 587.00 | 137Cs | S. anglica | - | - | 25 - 30 |
| Oenema and DeLaune, (1988) | USM | 51.50, 4.10 | Netherlands | 650.00 | 137Cs | S. anglica | - | - | 25 - 30 |
| Orson *et al.,* (1998) | USM | 41.30, -71.90 | USA | 81.60 | 137Cs | S. patens | 10.2 | - | - |
| Orson *et al*., (1998) | USM | 41.30, -71.90 | USA | 83.80 | 137Cs | S. patens | 10.2 | - | - |
| Palomo and Niell, (2009) | USM | 36.10, -5.26 | Spain | 550.00 | SOC monitoring | S. perennis ssp. Alpini | - | - | 45 |
| Patrick and DeLaune, (1990) | USM | 37.50, -122.00 | USA | 385.00 | 137Cs | S. virginica, D. spicata, S. foliosa | 15.5 | - | - |
| Patrick and DeLaune, (1990) | USM | 37.60, -122.20 | USA | 54.00 | 137Cs | S. virginica, D. spicata, S. foliosa | 15.5 | - | - |
| Peck *et al.,* (2020) | USM | 46.10, -123.78 | USA | 54.00 | 210Pb | C. lyngbyei | - | - | - |
| Peck *et al.,* (2020) | USM | 46.10, -123.78 | USA | 107.00 | 210Pb | S. tabernaemontani, A. filix-femina | - | - | - |
| Peck *et al.,* (2020) | USM | 45.69, -123.89 | USA | 49.00 | 210Pb | T. maritima, Carex. | - | - | - |
| Peck *et al.,* (2020) | USM | 45.69, -123.89 | USA | 120.00 | 210Pb | J. balticus, P. anserina, C. lyngbyei | - | - | - |
| Peck *et al.,* (2020) | USM | 45.48, -123.89 | USA | 88.00 | 210Pb | C. lyngbyei | - | - | - |
| Peck *et al.,* (2020) | USM | 45.37, -123.96 | USA | 74.00 | 210Pb | D. cespitosa, J. balticus | - | - | - |
| Peck *et al.,* (2020) | USM | 45.02, -123.96 | USA | 79.00 | 210Pb | D. cespitosa, J. balticus, A. stolonifera | - | - | - |
| Peck *et al.,* (2020) | USM | 44.42, -124.03 | USA | 67.00 | 210Pb | D. spicata, C. lyngbyei, S. perennis | - | - | - |
| Peck *et al.,* (2020) | USM | 44.42, -124.03 | USA | 63.00 | 210Pb | D. cespitosa, J. balticus, A. stolonifera | - | - | - |
| Peck *et al.,* (2020) | USM | 43.14, -124.39 | USA | 50.00 | 210Pb | T. maritima, J. carnosa | - | - | - |
| Peck *et al.,* (2020) | USM | 43.14, -124.39 | USA | 52.00 | 210Pb | D. cespitosa, J. balticus, P. anserina | - | - | - |
| Pendea and Chmura, (2012) | USM | 52.78, -78.76 | Canada | 42.00 | %C concentration x sediment accumulation rate | C. paleaea, J balticus, S. maritimus | - | - | - |
| Pendea and Chmura, (2012) | USM | 52.78, -78.76 | Canada | 87.00 | %C concentration x sediment accumulation rate | C. paleaea, J balticus, S. maritimus | - | - | - |
| Roman *et al.,* (1997) | USM | 41.50, -70.00 | USA | 105.00 | LOI / 137Cs | S. alterniflora | 9.8 | - | - |
| Roman *et al.,* (1997) | USM | 41.50, -70.00 | USA | 155.00 | LOI / 137Cs | S. alterniflora | 7.0 | - | - |
| Roner *et al.,* (2016) | USM | 45.28, 12.27 | Italy | 132.00 | Loss on ignition | S. veneta, S. maritima, L. narbonense, S. fruticosa, J. maritimus, I. crithmoides, P. palustris, H. portulacoides, S. maritima, A. macrostachyum, A. tripolium | - | - | - |
| Saintlan *et al.,* (2013) | USM | -33.60, 151.20 | Australia | 207.00 | Feldspar marker horizons | J. kraussii | 17.5 | - | - |
| Sousa *et al.,* (2010) | USM | 38.80, -8.90 | Portugal | 330.00 | 137Cs | S. maritima | 17.4 | - | 15.4 |
| Sousa *et al.,* (2010) | USM | 38.80, -8.90 | Portugal | 750.00 | 137Cs | S. maritima | 17.4 | - | 38.7 |
| Sousa *et al.,* (2010) | USM | 40.10, -8.60 | Portugal | 218.00 | 137Cs | S. maritima | 16.0 | - | 20.3 |
| Unger *et al*., (2016) | USM | 40.01, -74.04 | USA | 100.00 | %C x marsh age | S. alterniflora | - | - | 20.2 |
| Unger *et al*., (2016) | USM | 39.54, -74.05 | USA | 140.00 | %C x marsh age | S. alterniflora | - | - | 25.1 |
| Unger *et al*., (2016) | USM | 39.38, -74.15 | USA | 169.00 | %C x marsh age | S. alterniflora | - | - | 25.1 |
| Unger *et al*., (2016) | USM | 39.16, -75.05 | USA | 180.00 | %C x marsh age | S. alterniflora | - | - | 16.8 |
| Unger *et al*., (2016) | USM | 39.12, -75.00 | USA | 331.00 | %C x marsh age | S. alterniflora | - | - | 12.4 |
| Unger *et al*., (2016) | USM | 39.10, -74.51 | USA | 209.00 | %C x marsh age | S. alterniflora | - | - | 16 |
| Wang *et al*., (2017) | USM | 37.06, 119.22 | China | 17.50 | %C concentration x sediment accumulation rate | T. chinesis | 11.9 | 628.6 | - |
| Ward, (2020) | USM | 69.97, 23.43 | Norway | 19.00 | 210Pb | P. phryganodes, P. retroflexa borealis, C. officinalis, C. subspathacea, F. rubra, C. glareosa, C.mackenziei, J. gerardii | 2.5 | 431 | - |
| Ward, (2020) | USM | 69.58, 23.25 | Norway | 22.00 | 210Pb | P. phryganodes, P. retroflexa borealis, C. officinalis, C. subspathacea, F. rubra, C. glareosa, C.mackenziei, J. gerardii | 2.5 | 431 | - |
| Ward, (2020) | USM | 70.19, 24.92 | Norway | 260.00 | 210Pb | P. phryganodes, P. retroflexa borealis, C. officinalis, C. subspathacea, F. rubra, C. glareosa, C.mackenziei, J. gerardii | 1.8 | 403 | - |
| Ward, (2020) | USM | 70.19, 24.92 | Norway | 321.00 | 210Pb | P. phryganodes, P. retroflexa borealis, C. officinalis, C. subspathacea, F. rubra, C. glareosa, C.mackenziei, J. gerardii | 1.8 | 403 | - |
| Ward, (2020) | USM | 69.49, 20.82 | Norway | 49.00 | 210Pb | P. phryganodes, P. retroflexa borealis, C. officinalis, C. subspathacea, F. rubra, C. glareosa, C.mackenziei, J. gerardii | 3.6 | 1006 | - |
| Ward, (2020) | USM | 69.49, 20.82 | Norway | 603.00 | 210Pb | P. phryganodes, P. retroflexa borealis, C. officinalis, C. subspathacea, F. rubra, C. glareosa, C.mackenziei, J. gerardii | 3.6 | 1006 | - |
| Ward, (2020) | USM | 69.27, 19.92 | Norway | 390.00 | 210Pb | P. phryganodes, P. retroflexa borealis, C. officinalis, C. subspathacea, F. rubra, C. glareosa, C.mackenziei, J. gerardii | 2.9 | 401 | - |
| Ward, (2020) | USM | 69.27, 19.92 | Norway | 340.00 | 210Pb | P. phryganodes, P. retroflexa borealis, C. officinalis, C. subspathacea, F. rubra, C. glareosa, C.mackenziei, J. gerardii | 2.9 | 401 | - |
| Ward, (2020) | USM | 69.78, 20.99 | Norway | 368.00 | 210Pb | P. phryganodes, P. retroflexa borealis, C. officinalis, C. subspathacea, F. rubra, C. glareosa, C.mackenziei, J. gerardii | 2.5 | 782 | - |
| Ward, (2020) | USM | 69.78, 20.99 | Norway | 159.00 | 210Pb | P. phryganodes, P. retroflexa borealis, C. officinalis, C. subspathacea, F. rubra, C. glareosa, C. mackenziei, J. gerardii | 2.5 | 782 | - |
| Weinstein and Kreeger, (2007) | USM | 41.40, -71.30 | USA | 165.00 | 137Cs | - | 10.7 | - | - |
| Weston *et al.,* (2014) | USM | 39.43, -75.41 | USA | 256.60 | 137Cs | S. alterniflora | - | - | Mesohaline |
| Weston *et al.,* (2014) | USM | 39.62, -75.45 | USA | 220.80 | 137Cs | Z. aquatica | - | - | Oligohaline |
| Woodwell *et al.,* (1977) | USM | 40.57, -73.08 | USA | 51.00 | Inputs - outputs | S. alterniflora | - | - | - |
| Xiang *et al.,* (2015) | USM | 33.30, 120.38 | China | 150.00 | SOC monitoring | S. alterniflora | - | - | - |
| Ye *et al.,* (2015) | USM | 40.51, 121.51 | China | 107.00 | 210Pb | S. salsa | 8.4 | 623 | 21-27 |
| Ye *et al.,* (2015) | USM | 40.50, 121.51 | China | 154.00 | 210Pb | S. salsa | 8.4 | 623 | 21-27 |
| Ye *et al.,* (2015) | USM | 40.49, 121.51 | China | 388.00 | 210Pb | S. salsa | 8.4 | 623 | 21-27 |
| Ye *et al.,* (2015) | USM | 40.50, 121.56 | China | 206.00 | 210Pb | S. salsa | 8.4 | 623 | 21-27 |
| Ye *et al.,* (2015) | USM | 37.45, 118.45 | China | 54.00 | SOC monitoring | Gossypium spp. | 12.3 | 537 | 0.6-20 |
| Ye *et al.,* (2015) | USM | 37.45, 118.45 | China | 1118.00 | SOC monitoring | S. salsa | 12.3 | 537 | 0.6-20 |
| Ye *et al.,* (2015) | USM | 37.45, 118.45 | China | 99.00 | SOC monitoring | S. salsa | 12.3 | 537 | 0.6-20 |
| Ye *et al.,* (2015) | USM | 37.45, 118.45 | China | 96.00 | SOC monitoring | S. salsa | 12.3 | 537 | 0.6-20 |
| Ye *et al.,* (2015) | USM | 37.45, 118.45 | China | 232.00 | SOC monitoring | P. australis | 12.3 | 537 | 0.6-20 |
| Ye *et al.,* (2015) | USM | 37.45, 118.45 | China | 167.00 | SOC monitoring | P. australis | 12.3 | 537 | 0.6-20 |
| Ye *et al.,* (2015) | USM | 37.45, 118.45 | China | 227.00 | SOC monitoring | P. australis | 12.3 | 537 | 0.6-20 |
| Yuan *et al.,* (2015) | USM | 33.22, 120.42 | China | 119.00 | SOC monitoring | S. salsa | 12.6 | 1040 | 7.75 |
| Yuan *et al.,* (2015) | USM | 33.22, 120.42 | China | 316.00 | SOC monitoring | S. alterniflora | 12.6 | 1040 | 16.06 |
| Yuan *et al.,* (2015) | USM | 33.22, 120.42 | China | 36.00 | SOC monitoring | P. australis | 12.6 | 1040 | 3.16 |
| Anisfeld *et al.*, (1999); Anisfeld, (1995) | RS | 41.16, -72.48 | USA | 182.00 | LOI / 137Cs | S. alterniflora | 10.3 | - | - |
| Anisfeld *et al.*, (1999); Anisfeld, (1995) | RSM | 41.16, -72.48 | USA | 181.00 | LOI / 137Cs | S. alterniflora | 10.3 | - | - |
| Artigas *et al.,* (2015) | RSM | 40.45, -74.05 | USA | 192.20 | 137Cs | S. patens, D. spicata, S. cynosuroides, J. gerardii, S. alterniflora | - | - | - |
| Burden *et al.,* (2013) | RSM | 51.46, 0.51 | UK | 924.00 | %C x marsh age | P. maritima, S. anglica, S europaea | - | - | - |
| Craft *et al.,* (1999) | RSM | 34.41, -76.48 | USA | 125.00 | SOC monitoring | S. alterniflora | - | - | 25-35 |
| Craft *et al.,* (1999) | RSM | 34.03, -77.55 | USA | 99.00 | SOC monitoring | S. alterniflora | - | - | 7-10 |
| Craft *et al.,* (2002) | RSM | 35.25, -76.75 | USA | 142.00 | - | S. alterniflora | - | - | 0 - 15 |
| Craft *et al.,* (2002) | RSM | 35.25, -76.75 | USA | 113.00 | - | S. cynosuroides | - | - | 0 - 15 |
| Craft *et al.,* (2002) | RSM | 35.25, -76.75 | USA | 59.00 | - | S. patens | - | - | 0 - 15 |
| Craft *et al.,* (2003) | RSM | 34.70, -76.75 | USA | 99.00 | SOC monitoring | S. alterniflora | - | - | 20-30 |
| Craft *et al.,* (2003) | RSM | 33.87, -77.97 | USA | 39.00 | SOC monitoring | S. alterniflora | - | - | 17-32 |
| Craft *et al.,* (2003) | RSM | 33.92, -78.22 | USA | 27.00 | SOC monitoring | S. alterniflora | - | - | 18-30 |
| Craft *et al.,* (2003) | RSM | 34.40, -77.07 | USA | 18.00 | SOC monitoring | S. alterniflora | - | - | 20-30 |
| Craft *et al.,* (2003) | RSM | 33.92, -78.25 | USA | 62.00 | SOC monitoring | S. alterniflora | - | - | 14-33 |
| Craft *et al.,* (2003) | RSM | 34.70, -76.82 | USA | 21.00 | SOC monitoring | S. alterniflora | - | - | 20-30 |
| Craft *et al.,* (2003) | RSM | 33.92, -77.94 | USA | 34.00 | SOC monitoring | S. alterniflora | - | - | 20-30 |
| Craft *et al.,* (2003) | RSM | 34.03, -77.54 | USA | 39.00 | SOC monitoring | S. alterniflora | - | - | 5-20 |
| Davis *et al.,* (2015) | RSM | 34.43, -76.40 | USA | 73.00 | %C x marsh age | S. alterniflora | - | - | - |
| Davis *et al.,* (2015) | RSM | 34.43, -76.40 | USA | 208.60 | %C x marsh age | S. alterniflora | - | - | - |
| Davis *et al.,* (2015) | RSM | 34.43, -76.41 | USA | 119.00 | %C x marsh age | S. alterniflora | - | - | - |
| Davis *et al.,* (2015) | RSM | 34.43, -76.41 | USA | 123.00 | %C x marsh age | S. alterniflora | - | - | - |
| Davis *et al.,* (2015) | RSM | 34.43, -76.41 | USA | 125.00 | %C x marsh age | S. alterniflora | - | - | - |
| Davis *et al.,* (2015) | RSM | 34.43, -76.41 | USA | 86.00 | %C x marsh age | S. alterniflora | - | - | - |
| Davis *et al.,* (2015) | RSM | 34.43, -76.40 | USA | 208.00 | %C x marsh age | S. alterniflora | - | - | - |
| Davis *et al.,* (2015) | RSM | 34.43, -76.40 | USA | 104.00 | %C x marsh age | S. alterniflora | - | - | - |
| Davis *et al.,* (2015) | RSM | 34.43, -76.40 | USA | 209.00 | %C x marsh age | S. alterniflora | - | - | - |
| Davis *et al.,* (2015) | RSM | 34.43, -76.40 | USA | 283.00 | %C x marsh age | S. alterniflora | - | - | - |
| Davis *et al.,* (2015) | RSM | 34.43, -76.40 | USA | 58.00 | %C x marsh age | S. alterniflora | - | - | - |
| Dong *et al., (*2020) | RSM | 30.91, 121.98 | China | 714.00 | Emission + SOC | S. alterniflora | 15.3 | 1022 | - |
| Drake *et al.,* (2015) | RSM | 43.15, -70.35 | USA | 75.00 | 137Cs | S. alterniflora, S. patens | - | - | 28 |
| Drake *et al.,* (2015) | RSM | 42.45, -70.48 | USA | 100.00 | 137Cs | B halimifolia, D. spcata, P. australis, S. alterniflora, S. patens | - | - | 20 |
| Drake *et al.,* (2015) | RSM | 40.46, -72.53 | USA | 80.00 | 137Cs | B. halimifolia, P. australis, S. alterniflora, S. patens | - | - | 12 |
| Drake *et al.,* (2015) | RSM | 39.30, -74.25 | USA | 118.00 | 137Cs | I. frutescens, S. alterniflora, S. patens | - | - | 18 |
| Drexler *et al.,* (2019) | RSM | 47.40, -122.42 | USA | 164.00 | 210Pb | S. pacifica, Spergularia spp. | 15.0 | 1000 | Polyhaline |
| Gulliver *et al.,* (2020) | RSM | -38.04, 144.28 | Australia | 54.00 | 210Pb | T. abuscula, S. quinqueflora, S. australis | - | - | - |
| Gulliver *et al.,* (2020) | RSM | -38.02, 144.31 | Australia | 102.00 | 210Pb | T. abuscula, S. quinqueflora, S. australis | - | - | - |
| Shiau *et al.,* (2019) | RSM | 34.47, -76.33 | USA | 58.00 | Inputs - outputs | S. alterniflora, J. roemerianus, S. patens | - | - | 10-15 |
| Staver *et al.,* (2020) | RSM | 38.45, -76.23 | USA | 206.00 | - | S. alterniflora, S. patens | - | - | 10.1-12.5 |
| Wollenberg *et al.,* (2018) | RSM | 45.41, -64.17 | Canada | 1329.00 | - | S. alterniflora | - | - | - |
| Zhang *et al.,* (2021) | RSM | -32.51, 151.43 | China | 100.00 | SOC monitoring | S. alterniflora, S. salsa, T. chinensis, P. australis, I. cylindrica, T. orientalis | - | - | - |
| Chen *et al.,* (2020) | MF | 40.60, 122.12 | China | 71.59 | 137Cs | - | 9.5 | 640 | 30.5 |
| Chen *et al.,* (2020) | MF | 40.59, 122.16 | China | 168.24 | 137Cs | - | 9.5 | 640 | 30.5 |
| Chen *et al.,* (2020) | MF | 40.57, 122.19 | China | 82.54 | 137Cs | - | 9.5 | 640 | 30.5 |
| Chen *et al.,* (2020) | MF | 39.21, 118.95 | China | 158.67 | 137Cs | - | 12.9 | 511 | 29.3 |
| Chen *et al.,* (2020) | MF | 39.21, 117.95 | China | 133.37 | 137Cs | - | 12.9 | 511 | 29.3 |
| Chen *et al.,* (2020) | MF | 36.20, 120.17 | China | 192.95 | 137Cs | - | 12.6 | 660 | 31.7 |
| Chen *et al.,* (2020) | MF | 31.49, 121.98 | China | 91.51 | 137Cs | - | 16.1 | 1100 | 2 |
| Chen *et al.,* (2020) | MF | 30.31, 121.40 | China | 153.84 | 137Cs | - | 16.6 | 1260 | 15 |
| Dong *et al., (*2020) | MF | 31.09, 121.9 | China | 633.00 | Emission + SOC | - | 15.2 | 1022 | - |
| Gao *et al.,* (2012) | MF | 33.32, 120.33 | China | 21.89 | 137Cs | - | - | - | - |
| Gao *et al.,* (2016) | MF | 33.17, 120.77 | China | 59.00 | - | - | 14.4 | 1087.8 | - |
| Jimenez-Arias *et al.,* (2020) | MF | 36.49, -6.21 | Spain | 78.83 | %C concentration x sediment accumulation rate | - | - | - | - |
| Jimenez-Arias *et al., (*2020) | MF | 36.49, -6.21 | Spain | 65.73 | %C concentration x sediment accumulation rate | - | - | - | - |
| Krull and Craft, (2009) | MF | 31.19, -81.20 | USA | 263.00 | SOC monitoring | S. alterniflora | - | - | 14-19 |
| Peck *et al.,* (2020) | MF | 45.37, -123.96 | USA | 51.00 | 210Pb | - | - | - | - |
| Ye *et al.,* (2015) | MF | 40.49, 121.51 | China | 374.00 | 210Pb | - | 8.4 | 623 | 21-27 |
| Ye *et al.,* (2015) | MF | 40.50, 121.57 | China | 94.00 | 210Pb | - | 8.4 | 623 | 21-27 |
| Ye *et al.,* (2015) | MF | 40.50, 121.57 | China | 136.00 | 210Pb | - | 8.4 | 623 | 21-27 |
| Yuan *et al.,* (2015) | MF | 33.22, 120.42 | China | 22.00 | SOC monitoring | - | 12.6 | 1040 | 9.96 |
| Zhao *et al.,* (2012) | MF | 33.10, 120.48 | China | 1230.75 | - | - | 14.2 | 1087 | - |
| **Methane** | | | | | | | | | |
| Adams and Jickells, (2012) | USM | 51.72, 0.80 | UK | 0.21 | Static chamber technique | - | - | - | - |
| Atkinson and Hall, (1976) | USM | 31.98, -81.01 | USA | 0.81 | Gas exchange | S. alterniflora | - | - | - |
| Bartlett *et al.,* (1985) | USM | 37.00, -76.11 | USA | 0.00 | Flow through chamber | S. alterniflora | - | - | - |
| Bartlett *et al.,* (1985) | USM | 37.00, -76.11 | USA | 0.00 | Flow through chamber | S. alterniflora | - | - | - |
| Bartlett *et al.,* (1985) | USM | 39.00, -76.11 | USA | 0.00 | Flow through chamber | S. alterniflora | - | - | - |
| Bartlett *et al.,* (1985) | USM | 38.00, -76.11 | USA | 0.00 | Flow through chamber | S. alterniflora | - | - | - |
| Bartlett *et al.,* (1985) | USM | 38.00, -76.11 | USA | 0.00 | Flow through chamber | S. alterniflora | - | - | - |
| Bartlett *et al.,* (1985) | USM | 33.00, -78.88 | USA | 0.00 | Flow through chamber | S. alterniflora | - | - | - |
| Bartlett *et al.,* (1985) | USM | 31.47, -81.24 | USA | 0.01 | Flow through chamber | S. alterniflora | - | - | - |
| Bartlett *et al.,* (1985) | USM | 30.00, -80.55 | USA | 0.00 | Flow through chamber | J. roemerianus, S. alterniflora | - | - | - |
| Bartlett *et al.,* (1985) | USM | 30.00, -80.55 | USA | 0.00 | Flow through chamber | S. alterniflora | - | - | - |
| Bartlett *et al.,* (1987) | USM | 37.57, -76.86 | USA | 22.40 | - | S. alterniflora, S. cynosuroides | - | - | 5.5 |
| Bartlett *et al.,* (1987) | USM | 37.30, -76.55 | USA | 5.60 | - | S. alterniflora | - | - | 8.8 |
| Bu *et al.,* (2019) | USM | 31.45, 121.95 | China | 4.59 | Static chamber technique | S. alterniflora, P. australis, S. mariqueter | 15.3 | 1022 | 2-6 |
| Bu *et al.,* (2019) | USM | 31.46, 121.96 | China | 0.96 | Static chamber technique | S. alterniflora, P. australis, S. mariqueter | 15.3 | 1022 | 2-7 |
| Cao *et al.,* (2020) | USM | 33.36, 120.36 | China | 0.74 | Static chamber technique | S. alterniflora | 18.7 | 1040 | - |
| Cao *et al.,* (2020) | USM | 33.36, 120.36 | China | 0.66 | Static chamber technique | S. glauca | 18.7 | 1040 | - |
| Cao *et al.,* (2020) | USM | 33.36, 120.36 | China | 4.21 | Static chamber technique | P. australis | 18.7 | 1040 | - |
| Cao *et al.,* (2020) | USM | 33.36, 120.36 | China | 2.44 | Static chamber technique | S. triquester | 18.7 | 1040 | - |
| Chen *et al.,* (2018) | USM | 37.45, 119.09 | China | 0.62 | Static chamber technique | S. salsa, P. australis | 13.6 | - | 1.44 |
| Chen *et al.,* (2018) | USM | 37.44, 119.05 | China | 0.66 | Static chamber technique | P. australis | 13.6 | - | 0.61 |
| Chen *et al.,* (2018) | USM | 37.46, 119.11 | China | 0.66 | Static chamber technique | T. chinensis | 13.6 | - | 8.67 |
| Chmura *et al.,* (2016) | USM | 45.05, -66.26 | Canada | 0.18 | Static chamber technique | S. patens | 13.0 | - | 23.7 |
| Chmura *et al.,* (2016) | USM | 46.46, -64.54 | Canada | 0.03 | Static chamber technique | S. patens | 14.9 | - | 13.7 |
| Emery and Fulweiler, (2017) | USM | 42.42, -70.50 | USA | 1.78 | Static chamber technique | - | - | - | - |
| Ford *et al.,* (2012) | USM | 53.41, -2.57 | UK | 0.01 | Static chamber technique | - | 14.9 | - | 2.5 |
| Ford *et al.,* (2012) | USM | 53.41, -2.57 | UK | 0.00 | Static chamber technique | - | 14.2 | - | 2 |
| Huertas *et al.,* (2019) | USM | 36.91, -6.28 | Spain | 0.61 | Static chamber technique | S. fruticosa, H. portulacoides, L. monopetalum | - | 550 | Polyhaline |
| Huertas *et al.,* (2019) | USM | 36.91, -6.28 | Spain | 3.73 | Static chamber technique | S. fruticosa, H. portulacoides, L. monopetalum | - | 550 | Mesohaline |
| Khan *et al.,* (2017) | USM | 54.60, 8.85 | Germany | 0.30 | Static chamber technique | S. anglica, S. europea | - | - | - |
| Khan *et al.,* (2017) | USM | 54.60, 8.85 | Germany | 0.03 | Static chamber technique | P. maritima | - | - | - |
| Li *et al., (*2018A) | USM | 31.31, 121.57 | China | 17.60 | - | P. australis, S. alterniflora | 17.1 | 886.9 | 0-25 |
| Li *et al., (*2018B) | USM | 31.30, 121.59 | China | 8.76 | Static chamber technique | Phragmites sp., S. mariqueter, S. alterniflora | - | - | - |
| Li *et al.,* (2020) | USM | 39.37, 123.11 | China | 0.36 | Static chamber technique | - | 9.0 | - | 11.8-13.6 |
| Li *et al.,* (2020) | USM | 39.30, 118.42 | China | 0.59 | Static chamber technique | - | 12.5 | - | 23.1-24.7 |
| Li *et al.,* (2020) | USM | 37.32, 119.10 | China | 0.26 | Static chamber technique | - | 12.3 | - | 25.7-27.9 |
| Li *et al.,* (2020) | USM | 36.37, 121.24 | China | 0.40 | Static chamber technique | - | 12.7 | - | 21.2-24.2 |
| Li *et al.,* (2020) | USM | 34.09, 120.10 | China | 0.48 | Static chamber technique | - | 14.1 | - | 14.8-13.3 |
| Li *et al.,* (2020) | USM | 31.08, 121.52 | China | 2.03 | Static chamber technique | - | 17.6 | - | 7.5-12.4 |
| Nedwell *et al.,* (2004) | USM | 51.83, 1.01 | UK | 0.28 | - | - | - | - | 20-30 |
| Nedwell *et al.,* (2004) | USM | 51.77, 1.04 | UK | 0.41 | - | - | - | - | 32-34 |
| Nedwell *et al.,* (2004) | USM | 51.88, 0.92 | UK | 0.36 | - | - | - | - | 0-10 |
| Powell *et al.,* (2020) | USM | 39.98, -74.12 | USA | 0.53 | Static chamber technique | S. alterniflora, S. patens | - | - | 15-35 |
| Reid *et al.,* (2013) | USM | 40.82, -74.05 | USA | 5.78 | Static chamber technique | S. alterniflora | - | 1298 | 2-9 |
| Senior *et al.,* (1982) | USM | 51.77, 1.04 | UK | 0.00 | - | - | - | - | 32-34 |
| Senior *et al.,* (1982) | USM | 51.77, 1.04 | UK | 0.00 | - | - | - | - | 32-34 |
| Sun *et al.,* (2013) | USM | 37.92, 119.05 | China | -0.09 | Static chamber technique | S. salsa, P. australis | 15.3 | 551.6 | - |
| Sun *et al.,* (2013) | USM | 37.92, 119.05 | China | -0.15 | Static chamber technique | S. salsa, T. chinensis | 14.6 | 551.6 | - |
| Sun *et al.,* (2013) | USM | 37.92, 119.05 | China | -0.12 | Static chamber technique | S. salsa | 13.4 | 551.6 | - |
| This study | USM | 51.83, 0.97 | UK | 0.01 | - | - | - | - | - |
| This study | USM | 51.78, 0.84 | UK | 0.00 | - | - | - | - | - |
| This study | USM | 51.79, 0.92 | UK | 0.00 | - | - | - | - | - |
| This study | USM | 51.83, 0.96 | UK | 0.00 | - | - | - | - | - |
| Vazquez-Lule and Vargas, (2021) | USM | 39.05, -75.26 | USA | 11.10 | - | S. alterniflora | 14.0 | 576 | - |
| Wang *et al.,* (2009A) | USM | 31.48, 121.97 | China | 18.05 | Static chamber technique | P. communis, S. mariquete, S. triqueter | - | - | - |
| Wang *et al.,* (2009B) | USM | 33.36, 120.36 | China | 4.10 | - | S. alterniflora | - | - | - |
| Witte and Giani, (2016) | USM | 53.26, 7.50 | Germany | -0.13 | Non-steady state chamber method | P. martima | - | - | - |
| Witte and Giani, (2016) | USM | 53.26, 7.50 | Germany | 0.48 | Non-steady state chamber method | P. martima | - | - | - |
| Witte and Giani, (2016) | USM | 53.26, 7.50 | Germany | 1.87 | Non-steady state chamber method | P. martima | - | - | - |
| Witte and Giani, (2016) | USM | 53.26, 7.50 | Germany | 0.00 | Non-steady state chamber method | E. athericus | - | - | - |
| Witte and Giani, (2016) | USM | 53.26, 7.50 | Germany | 0.47 | Non-steady state chamber method | E. athericus | - | - | - |
| Witte and Giani, (2016) | USM | 53.26, 7.50 | Germany | 0.24 | Non-steady state chamber method | E. athericus | - | - | - |
| Witte and Giani, (2016) | USM | 53.26, 7.50 | Germany | 0.23 | Non-steady state chamber method | - | - | - | Brackish |
| Witte and Giani, (2016) | USM | 53.26, 7.50 | Germany | 0.30 | Non-steady state chamber method | - | - | - | Brackish |
| Witte and Giani, (2016) | USM | 53.26, 7.50 | Germany | 2.82 | Non-steady state chamber method | - | - | - | Brackish |
| Xu *et al.,* (2014) | USM | 33.36, 120.36 | China | 1.64 | Static chamber technique | S. alterniflora | 12.6 | 1040 | - |
| Xu *et al.,* (2014) | USM | 33.36, 120.36 | China | 0.40 | Static chamber technique | S. glauca | 12.6 | 1040 | - |
| Ye *et al.*, (2016) | USM | 40.57, 121.48 | China | 0.02 | Static chamber technique | S. salsa | 8.0 | 612 | 7.6 |
| Ye *et al.*, (2016) | USM | 40.57, 121.48 | China | 11.21 | - | P. australis | 8.0 | 612 | 8.4 |
| Yuan et al., (2015) | USM | 33.22, 120.42 | China | 1.79 | Static chamber technique | S. salsa | 12.6 | 1040 | 7.75 |
| Yuan et al., (2015) | USM | 33.22, 120.42 | China | 0.49 | Static chamber technique | S. alterniflora | 12.6 | 1040 | 16.06 |
| Yuan et al., (2015) | USM | 33.22, 120.42 | China | 1.70 | Static chamber technique | P. australis | 12.6 | 1040 | 3.16 |
| Adams and Jickells, (2012) | RSM | 51.72, 0.80 | UK | 0.14 | Static chamber technique | - | - | - | - |
| This study | RSM | 51.78, 0.84 | UK | 0.01 | - | - | - | - | - |
| This study | RSM | 51.79, 0.92 | UK | 0.01 | - | - | - | - | - |
| This study | RSM | 51.83, 0.96 | UK | 0.01 | - | - | - | - | - |
| Adams and Jickells, (2012) | MF | 51.72, 0.80 | UK | 0.40 | Static chamber technique | - | - | - | - |
| Adams and Jickells, (2012) | MF | 51.72, 0.80 | UK | 0.10 | Static chamber technique | - | - | - | - |
| Cao *et al.,* (2020) | MF | 33.36, 120.36 | China | -0.06 | Static chamber technique | - | 18.7 | 1040 | - |
| Chen *et al.,* (2018) | MF | 37.42, 119.14 | China | 0.62 | Static chamber technique | - | 13.6 | - | 28.59 |
| Nedwell *et al.,* (2004) | MF | 51.77, 1.04 | UK | 0.40 | - | - | - | - | 32-34 |
| Reid *et al.,* (2013) | MF | 40.82, -74.05 | USA | 5.13 | Static chamber technique | - | - | 1298 | 2-8 |
| Sun *et al.,* (2013) | MF | 37.92, 119.05 | China | -0.08 | Static chamber technique | - | 14.3 | 551.6 | - |
| Wang *et al.,* (2009) | MF | 31.48, 121.97 | China | 0.35 | Static chamber technique | - | - | - | - |
| Xu *et al.,* (2014) | MF | 33.36, 120.37 | China | 0.34 | Static chamber technique | - | 12.6 | 1040 | - |
| Yuan *et al.,* (2015) | MF | 33.22, 120.42 | China | 0.42 | Static chamber technique | - | 12.6 | 1040 | 9.96 |

| **Reference** | **Realignment stage** | **Coordinates** | **Country** | **Mean emission  (mg m-2 yr-1)** | **Measurement method** | **Dominant halophyte species/genera** | **Mean annual temperature (oC)** | **Mean annual precipitation (mm)** | **Salinity (g/kg)** |
| --- | --- | --- | --- | --- | --- | --- | --- | --- | --- |
|  | **Nitrous oxide** | | | | | | | |  |
| Adams and Jickells, (2012) | USM | 51.72, 0.80 | UK | 30.00 | Static chamber technique | - | - | - | - |
| Cao *et al.,* (2020) | USM | 33.36, 120.36 | China | 118.26 | Static chamber technique | S. alterniflora | 18.7 | 1040 | - |
| Cao *et al.,* (2020) | USM | 33.36, 120.36 | China | 63.95 | Static chamber technique | S. glauca | 18.7 | 1040 | - |
| Cao *et al.,* (2020) | USM | 33.36, 120.36 | China | 148.04 | Static chamber technique | P. australis | 18.7 | 1040 | - |
| Cao *et al.,* (2020) | USM | 33.36, 120.36 | China | 90.23 | Static chamber technique | S. triquester | 18.7 | 1040 | - |
| Chmura *et al.,* (2016) | USM | 45.05, -66.26 | Canada | -26.99 | Static chamber technique | S. patens | 13.0 | - | 23.7 |
| Chmura *et al.,* (2016) | USM | 46.46, -64.54 | Canada | -19.28 | Static chamber technique | S. patens | 14.9 | - | 13.7 |
| Emery and Fulweiler, (2017) | USM | 42.42, -70.50 | USA | -15.81 | Static chamber technique | - | - | - | - |
| Li *et al.,* (2020) | USM | 39.37, 123.11 | China | 31.00 | Static chamber technique | - | 9.0 | - | 11.8-13.6 |
| Li *et al.,* (2020) | USM | 39.30, 118.42 | China | 35.00 | Static chamber technique | - | 12.5 | - | 23.1-24.7 |
| Li *et al.,* (2020) | USM | 37.32, 119.10 | China | 69.00 | Static chamber technique | - | 12.3 | - | 25.7-27.9 |
| Li *et al.,* (2020) | USM | 36.37, 121.24 | China | 111.00 | Static chamber technique | - | 12.7 | - | 21.2-24.2 |
| Li *et al.,* (2020) | USM | 34.09, 120.10 | China | 49.00 | Static chamber technique | - | 14.1 | - | 14.8-13.3 |
| Li *et al.,* (2020) | USM | 31.08, 121.52 | China | 63.00 | Static chamber technique | - | 17.6 | - | 7.5-12.4 |
| Song *et al.,* (2018) | USM | 38.01, 118.58 | China | 115.98 | Static chamber technique | T. chinensis, S. salsa | - | - | - |
| Song *et al.,* (2018) | USM | 38.01, 118.57 | China | 86.11 | Static chamber technique | S. salsa | - | - | - |
| Song *et al.,* (2018) | USM | 38.00, 118.58 | China | 71.04 | Static chamber technique | S. alterniflora | - | - | - |
| Sun *et al.,* (2013) | USM | 37.92, 119.05 | China | 284.70 | Static chamber technique | S. salsa, P. australis | 15.3 | 551.6 | - |
| Sun *et al.,* (2013) | USM | 37.92, 119.05 | China | 77.96 | Static chamber technique | S. salsa, T. chinensis | 14.6 | 551.6 | - |
| Sun *et al.,* (2013) | USM | 37.92, 119.05 | China | 104.24 | Static chamber technique | S. salsa | 13.4 | 551.6 | - |
| Sun *et al*., (2014) | USM | 37.35, 118.33 | China | 63.95 | Static chamber technique | S. salsa | 12.1 | 551.6 | - |
| Sun *et al*., (2014) | USM | 37.35, 118.33 | China | 22.78 | Static chamber technique | S. salsa | 12.1 | 551.6 | - |
| Sun *et al*., (2014) | USM | 37.35, 118.33 | China | 224.26 | Static chamber technique | S. salsa | 12.1 | 551.6 | - |
| This study | USM | 51.83, 0.97 | UK | -0.35 | - | - | - | - | - |
| This study | USM | 51.78, 0.84 | UK | -0.97 | - | - | - | - | - |
| This study | USM | 51.79, 0.92 | UK | -0.47 | - | - | - | - | - |
| This study | USM | 51.83, 0.96 | UK | 0.74 | - | - | - | - | - |
| Witte and Giani, (2016) | USM | 53.26, 7.50 | Germany | -34.00 | Non-steady state chamber method | P. martima | - | - | - |
| Witte and Giani, (2016) | USM | 53.26, 7.50 | Germany | 109.00 | Non-steady state chamber method | P. martima | - | - | - |
| Witte and Giani, (2016) | USM | 53.26, 7.50 | Germany | -70.00 | Non-steady state chamber method | P. martima | - | - | - |
| Witte and Giani, (2016) | USM | 53.26, 7.50 | Germany | 97.00 | Non-steady state chamber method | E. athericus | - | - | - |
| Witte and Giani, (2016) | USM | 53.26, 7.50 | Germany | -46.00 | Non-steady state chamber method | E. athericus | - | - | - |
| Witte and Giani, (2016) | USM | 53.26, 7.50 | Germany | 25.00 | Non-steady state chamber method | E. athericus | - | - | - |
| Witte and Giani, (2016) | USM | 53.26, 7.50 | Germany | 182.00 | Non-steady state chamber method | Grasslands | - | - | Brackish |
| Witte and Giani, (2016) | USM | 53.26, 7.50 | Germany | 114.00 | Non-steady state chamber method | Grasslands | - | - | Brackish |
| Witte and Giani, (2016) | USM | 53.26, 7.50 | Germany | 163.00 | Non-steady state chamber method | Grasslands | - | - | Brackish |
| Xu *et al.,* (2014) | USM | 33.36, 120.36 | China | 145.20 | Static chamber technique | S. alterniflora | 12.6 | 1040 | - |
| Xu *et al.,* (2014) | USM | 33.36, 120.36 | China | 113.00 | Static chamber technique | S. glauca | 12.6 | 1040 | - |
| Yang *et al.,* (2020) | USM | 30.50, 121.50 | China | 36.79 | Static chamber technique | S. alterniflora | 15.9 | 1222 | - |
| Yuan *et al.,* (2015) | USM | 33.22, 120.42 | China | 56.00 | Static chamber technique | S. salsa | 12.6 | 1040 | 7.75 |
| Yuan *et al.,* (2015) | USM | 33.22, 120.42 | China | -51.00 | Static chamber technique | S. alterniflora | 12.6 | 1040 | 16.06 |
| Yuan *et al.,* (2015) | USM | 33.22, 120.42 | China | -25.00 | Static chamber technique | P. australis | 12.6 | 1040 | 3.16 |
| Zhang *et al.,* (2013) | USM | 37.35, 118.33 | China | 448.51 | Static chamber technique | T. chinensis | 12.1 | 551.6 | - |
| Zhang *et al.,* (2013) | USM | 37.35, 118.33 | China | 90.23 | Static chamber technique | S. salsa | 12.1 | 551.6 | - |
| Zhang *et al.,* (2013) | USM | 37.35, 118.33 | China | 18.40 | Static chamber technique | P. australis | 12.1 | 551.6 | - |
| Adams and Jickells, (2012) | RSM | 51.72, 0.80 | UK | 370.00 | Static chamber technique | - | - | - | - |
| This study | RSM | 51.78, 0.84 | UK | -0.73 | Static chamber technique | - | - | - | - |
| This study | RSM | 51.79, 0.92 | UK | 3.02 | Static chamber technique | - | - | - | - |
| This study | RSM | 51.83, 0.96 | UK | 1.26 | Static chamber technique | - | - | - | - |
| Adams and Jickells, (2012) | MF | 51.72, 0.80 | UK | 330.00 | Static chamber technique | - | - | - | - |
| Adams and Jickells, (2012) | MF | 51.72, 0.80 | UK | 170.00 | Static chamber technique | - | - | - | - |
| Cao *et al.,* (2020) | MF | 33.36, 120.36 | China | 52.56 | Static chamber technique | - | 18.7 | 1040 | - |
| Middelburg *et al.,* (1995) | MF | 51.39, 3.80 | Netherlands | 22.01 | Static chamber technique | - | - | - | - |
| Middelburg *et al.,* (1995) | MF | 51.40, 4.08 | Netherlands | -26.41 | Static chamber technique | - | - | - | - |
| Middelburg *et al.,* (1995) | MF | 51.40, 4.21 | Netherlands | 127.64 | Static chamber technique | - | - | - | - |
| Middelburg *et al.,* (1995) | MF | 51.35, 4.10 | Netherlands | 123.24 | Static chamber technique | - | - | - | - |
| Middelburg *et al.,* (1995) | MF | 51.31, 4.26 | Belgium | 290.48 | Static chamber technique | - | - | - | - |
| Middelburg *et al.,* (1995) | MF | 51.30, 4.28 | Belgium | 281.68 | Static chamber technique | - | - | - | - |
| Sun *et al., (*2013) | MF | 37.92, 119.05 | China | 122.64 | Static chamber technique | - | 14.3 | 551.6 | - |
| Sun *et al.,* (2014) | MF | 37.35, 118.33 | China | 93.73 | Static chamber technique | - | 12.1 | 551.6 | - |
| Xu *et al.,* (2014) | MF | 33.36, 120.37 | China | 49.93 | Static chamber technique | - | 12.6 | 1040 | - |
| Yang *et al.,* (2020) | MF | 30.50, 121.50 | China | 11.39 | - | - | 15.9 | 1222 | - |
| Yuan *et al.,* (2015) | MF | 33.22, 120.42 | China | 38.00 | - | - | 12.6 | 1040 | 9.96 |
| Zhang *et al.,* (2013) | MF | 37.35, 118.33 | China | 387.19 | - | - | 12.1 | 551.6 | - |
| **Dimethyl sulphide** | | | | | | | | | |
| Adams et al., (1981) | USM | 34.99, -76.27 | USA | 7.00 | Flow through chamber | - | - | - | - |
| Adams et al., (1981) | USM | 34.99, -76.27 | USA | 40.00 | Flow through chamber | - | - | - | - |
| Adams et al., (1981) | USM | 34.99, -76.27 | USA | 1570.00 | Flow through chamber | - | - | - | - |
| Adams et al., (1981) | USM | 33.94, -78.21 | USA | 1770.00 | Flow through chamber | - | - | - | - |
| Adams et al., (1981) | USM | 41.75, -70.67 | USA | 600.00 | Flow through chamber | - | - | - | - |
| Adams et al., (1981) | USM | 33.37, -79.27 | USA | 470.00 | Flow through chamber | - | - | - | - |
| Adams et al., (1981) | USM | 38.78, -75.12 | USA | 480.00 | Flow through chamber | - | - | - | - |
| Adams et al., (1981) | USM | 37.88, -75.44 | USA | 1870.00 | Flow through chamber | - | - | - | - |
| Aneja *et al.,* (1979) | USM | 34.99, -76.27 | USA | 1310.00 | Static chamber technique | S. alterniflora | - | - | - |
| Aneja *et al.,* (1979) | USM | 33.94, -78.21 | USA | 180.00 | Static chamber technique | S. alterniflora | - | - | - |
| DeLaune *et al.,* (2002) | USM | 29.16, -90.21 | USA | 175.29 | Static chamber technique | S. alterniflora | - | - | 10-12 |
| DeLaune *et al.,* (2002) | USM | 29.16, -90.21 | USA | 358.98 | Static chamber technique | S. alterniflora | - | - | 10-12 |
| DeLaune *et al.,* (2002) | USM | 29.16, -90.21 | USA | 627.48 | Static chamber technique | S. alterniflora | - | - | 10-12 |
| DeLaune *et al.,* (2002) | USM | 29.16, -90.21 | USA | 1261.70 | Static chamber technique | S. alterniflora | - | - | 10-12 |
| DeLaune *et al.,* (2002) | USM | 29.16, -90.21 | USA | 797.07 | Static chamber technique | S. alterniflora | - | - | 10-12 |
| DeLaune *et al.,* (2002) | USM | 29.16, -90.21 | USA | 339.36 | Static chamber technique | S. alterniflora | - | - | 10-12 |
| DeLaune *et al.,* (2002) | USM | 29.16, -90.21 | USA | 12.88 | Static chamber technique | S. alterniflora | - | - | 10-12 |
| DeLaune *et al.,* (2002) | USM | 29.16, -90.21 | USA | 245.02 | Static chamber technique | S. alterniflora | - | - | 10-12 |
| DeLaune *et al.,* (2002) | USM | 29.16, -90.21 | USA | 973.50 | Static chamber technique | S. alterniflora | - | - | 10-12 |
| DeLaune *et al.,* (2002) | USM | 29.16, -90.21 | USA | 642.28 | Static chamber technique | S. alterniflora | - | - | 10-12 |
| DeLaune *et al.,* (2002) | USM | 29.16, -90.21 | USA | 89.00 | Static chamber technique | S. alterniflora | - | - | 10-12 |
| DeLaune *et al.,* (2002) | USM | 29.55, -90.25 | USA | 4.99 | Static chamber technique | S. patens | - | - | 5-8 |
| DeLaune *et al.,* (2002) | USM | 29.55, -90.25 | USA | 5.69 | Static chamber technique | S. patens | - | - | 5-8 |
| DeLaune *et al.,* (2002) | USM | 29.55, -90.25 | USA | 16.38 | Static chamber technique | S. patens | - | - | 5-8 |
| DeLaune *et al.,* (2002) | USM | 29.55, -90.25 | USA | 5.17 | Static chamber technique | S. patens | - | - | 5-8 |
| DeLaune *et al.,* (2002) | USM | 29.55, -90.25 | USA | 6.39 | Static chamber technique | S. patens | - | - | 5-8 |
| DeLaune *et al.,* (2002) | USM | 29.55, -90.25 | USA | 5.52 | Static chamber technique | S. patens | - | - | 5-8 |
| DeLaune *et al.,* (2002) | USM | 29.55, -90.25 | USA | 5.69 | Static chamber technique | S. patens | - | - | 5-8 |
| DeLaune *et al.,* (2002) | USM | 29.55, -90.25 | USA | 4.47 | Static chamber technique | S. patens | - | - | 5-8 |
| DeLaune *et al.,* (2002) | USM | 29.55, -90.25 | USA | 9.72 | Static chamber technique | S. patens | - | - | 5-8 |
| DeLaune *et al.,* (2002) | USM | 29.55, -90.25 | USA | 8.67 | Static chamber technique | S. patens | - | - | 5-8 |
| DeLaune *et al.,* (2002) | USM | 29.55, -90.25 | USA | 8.32 | Static chamber technique | S. patens | - | - | 5-8 |
| Steudler and Peterson, (1985) | USM | 41.58, -70.64 | USA | 2873.28 | Flow through chamber | S. alterniflora | - | - | - |
| This study | USM | 51.83, 0.97 | UK | 0.00 | Static chamber technique | - | - | - | - |
| This study | USM | 51.78, 0.84 | UK | 0.00 | Static chamber technique | - | - | - | - |
| This study | USM | 51.79, 0.92 | UK | 0.00 | Static chamber technique | - | - | - | - |
| This study | USM | 51.83, 0.96 | UK | 0.00 | Static chamber technique | - | - | - | - |
| Wang and Wang, (2017) | USM | 33.36, 120.36 | China | 565.02 | Static chamber technique | S. alterniflora | - | - | - |
| Wang and Wang, (2017) | USM | 33.36, 120.36 | China | 2601.72 | Static chamber technique | S. alterniflora | - | - | - |
| Wang and Wang, (2017) | USM | 33.36, 120.36 | China | 8.76 | Static chamber technique | S. salsa | - | - | - |
| Wang and Wang, (2017) | USM | 33.36, 120.36 | China | 109.50 | Static chamber technique | S. salsa | - | - | - |
| Wang and Wang, (2017) | USM | 33.36, 120.36 | China | 13.14 | Static chamber technique | A. littoralis | - | - | - |
| Wang and Wang, (2017) | USM | 33.36, 120.36 | China | 52.56 | Static chamber technique | A. littoralis | - | - | - |
| Wang and Wang, (2017) | USM | 33.36, 120.36 | China | 1300.86 | Static chamber technique | S. alterniflora | - | - | - |
| Wang and Wang, (2017) | USM | 33.36, 120.36 | China | 4493.88 | Static chamber technique | S. alterniflora | - | - | - |
| Wang and Wang, (2017) | USM | 33.36, 120.36 | China | 14.89 | Static chamber technique | S. salsa | - | - | - |
| Wang and Wang, (2017) | USM | 33.36, 120.36 | China | 8.76 | Static chamber technique | S. salsa | - | - | - |
| Wang and Wang, (2017) | USM | 33.36, 120.36 | China | 5.26 | Static chamber technique | A. littoralis | - | - | - |
| Wang and Wang, (2017) | USM | 33.36, 120.36 | China | 17.52 | Static chamber technique | A. littoralis | - | - | - |
| This study | RSM | 51.78, 0.84 | UK | 0.00 | Static chamber technique | - | - | - | - |
| This study | RSM | 51.79, 0.92 | UK | 0.00 | Static chamber technique | - | - | - | - |
| This study | RSM | 51.83, 0.96 | UK | 0.00 | Static chamber technique | - | - | - | - |
| Cerqueira and Pio, (1999) | MF | 40.54, -8.76 | Portugal | 18.72 | Dynamic gas emission chamber | - | - | - | - |
| Cerqueira and Pio, (1999) | MF | 40.54, -8.76 | Portugal | 53.56 | Dynamic gas emission chamber | - | - | - | - |
| Cerqueira and Pio, (1999) | MF | 40.54, -8.76 | Portugal | 12.79 | Dynamic gas emission chamber | - | - | - | - |
| Cerqueira and Pio, (1999) | MF | 40.54, -8.76 | Portugal | 22.86 | Dynamic gas emission chamber | - | - | - | - |
| Wang and Wang, (2017) | MF | 33.36, 120.36 | China | 18.40 | Static chamber technique | - | - | - | - |
| Wang and Wang, (2017) | MF | 33.36, 120.36 | China | 0.00 | Static chamber technique | - | - | - | - |
| Wang and Wang, (2017) | MF | 33.36, 120.36 | China | 18.40 | Static chamber technique | - | - | - | - |
| Wang and Wang, (2017) | MF | 33.36, 120.36 | China | 0.00 | Static chamber technique | - | - | - | - |
| **Hydrogen sulphide** | | | | | | | | | |
| Carroll *et al.*, (1986) | USM | 37.84, -75.46 | USA | 565.90 | Static chamber technique | S. alterniflora, S. salsa | - | - | - |
| Carroll *et al.*, (1986) | USM | 37.84, -75.46 | USA | 349.52 | Static chamber technique | S. alterniflora, S. salsa | - | - | - |
| Carroll *et al.*, (1986) | USM | 37.84, -75.46 | USA | 1250.49 | Static chamber technique | S. alterniflora, S. salsa | - | - | - |
| Carroll *et al.*, (1986) | USM | 37.84, -75.46 | USA | 324.12 | Static chamber technique | S. alterniflora, S. salsa | - | - | - |
| Carroll *et al.*, (1986) | USM | 37.84, -75.46 | USA | 287.33 | Static chamber technique | S. alterniflora, S. salsa | - | - | - |
| Carroll *et al.*, (1986) | USM | 37.84, -75.46 | USA | 284.70 | Static chamber technique | S. alterniflora, S. salsa | - | - | - |
| Carroll *et al.*, (1986) | USM | 37.84, -75.46 | USA | 1180.41 | Static chamber technique | S. alterniflora, S. salsa | - | - | - |
| Carroll *et al.*, (1986) | USM | 37.84, -75.46 | USA | 1343.17 | Static chamber technique | S. alterniflora, S. salsa | - | - | - |
| Carroll *et al.*, (1986) | USM | 37.84, -75.46 | USA | 778.76 | Static chamber technique | S. alterniflora, S. salsa | - | - | - |
| DeLaune *et al.,* (2002) | USM | 29.16, -90.21 | USA | 4.56 | Static chamber technique | S. alterniflora | - | - | 10-12 |
| DeLaune *et al.,* (2002) | USM | 29.16, -90.21 | USA | 32.94 | Static chamber technique | S. alterniflora | - | - | 10-12 |
| DeLaune *et al.,* (2002) | USM | 29.16, -90.21 | USA | 20.41 | Static chamber technique | S. alterniflora | - | - | 10-12 |
| DeLaune *et al.,* (2002) | USM | 29.16, -90.21 | USA | 37.67 | Static chamber technique | S. alterniflora | - | - | 10-12 |
| DeLaune *et al.,* (2002) | USM | 29.16, -90.21 | USA | 21.90 | Static chamber technique | S. alterniflora | - | - | 10-12 |
| DeLaune *et al.,* (2002) | USM | 29.16, -90.21 | USA | 19.45 | Static chamber technique | S. alterniflora | - | - | 10-12 |
| DeLaune *et al.,* (2002) | USM | 29.16, -90.21 | USA | 11.13 | Static chamber technique | S. alterniflora | - | - | 10-12 |
| DeLaune *et al.,* (2002) | USM | 29.16, -90.21 | USA | 11.83 | Static chamber technique | S. alterniflora | - | - | 10-12 |
| DeLaune *et al.,* (2002) | USM | 29.16, -90.21 | USA | 51.51 | Static chamber technique | S. alterniflora | - | - | 10-12 |
| DeLaune *et al.,* (2002) | USM | 29.16, -90.21 | USA | 7.71 | Static chamber technique | S. alterniflora | - | - | 10-12 |
| DeLaune *et al.,* (2002) | USM | 29.16, -90.21 | USA | 18.05 | Static chamber technique | S. alterniflora | - | - | 10-12 |
| DeLaune *et al.,* (2002) | USM | 29.55, -90.25 | USA | 173.71 | Static chamber technique | S. patens | - | - | 5-8 |
| DeLaune *et al.,* (2002) | USM | 29.55, -90.25 | USA | 250.45 | Static chamber technique | S. patens | - | - | 5-8 |
| DeLaune *et al.,* (2002) | USM | 29.55, -90.25 | USA | 169.94 | Static chamber technique | S. patens | - | - | 5-8 |
| DeLaune *et al.,* (2002) | USM | 29.55, -90.25 | USA | 235.99 | Static chamber technique | S. patens | - | - | 5-8 |
| DeLaune *et al.,* (2002) | USM | 29.55, -90.25 | USA | 693.79 | Static chamber technique | S. patens | - | - | 5-8 |
| DeLaune *et al.,* (2002) | USM | 29.55, -90.25 | USA | 86.20 | Static chamber technique | S. patens | - | - | 5-8 |
| DeLaune *et al.,* (2002) | USM | 29.55, -90.25 | USA | 46.34 | Static chamber technique | S. patens | - | - | 5-8 |
| DeLaune *et al.,* (2002) | USM | 29.55, -90.25 | USA | 91.02 | Static chamber technique | S. patens | - | - | 5-8 |
| DeLaune *et al.,* (2002) | USM | 29.55, -90.25 | USA | 155.05 | Static chamber technique | S. patens | - | - | 5-8 |
| DeLaune *et al.,* (2002) | USM | 29.55, -90.25 | USA | 62.98 | Static chamber technique | S. patens | - | - | 5-8 |
| DeLaune *et al.,* (2002) | USM | 29.55, -90.25 | USA | 79.45 | Static chamber technique | S. patens | - | - | 5-8 |
| Xinhua *et al.,* (2015) | USM | 37.46, 119.08 | China | 28.82 | Static chamber technique | S. salsa, P. australis | 12.1 | 551.6 | - |
| Xinhua *et al.,* (2015) | USM | 37.46, 119.09 | China | 17.34 | Static chamber technique | S. salsa, T. chinensis | 12.1 | 551.6 | - |
| Xinhua *et al.,* (2015) | USM | 37.46, 119.09 | China | 29.52 | Static chamber technique | S. salsa, P. australis | 12.1 | 551.6 | - |
| Xinhua *et al.,* (2016) | USM | 37.35, 118.33 | China | 19.97 | Static chamber technique | P. australis | 12.1 | 551.6 | - |
| Azad *et al.,* (2005) | MF | 32.70, 130.58 | Japan | 78.58 | Static chamber technique | - | - | - | - |
| **Methanethiol** | | | | | | | | | |
| DeLaune *et al.,* (2002) | USM | 29.16, -90.21 | USA | 5.61 | Static chamber technique | S. alterniflora | - | - | 10-12 |
| DeLaune *et al.,* (2002) | USM | 29.16, -90.21 | USA | 26.89 | Static chamber technique | S. alterniflora | - | - | 10-12 |
| DeLaune *et al.,* (2002) | USM | 29.16, -90.21 | USA | 16.82 | Static chamber technique | S. alterniflora | - | - | 10-12 |
| DeLaune *et al.,* (2002) | USM | 29.16, -90.21 | USA | 89.53 | Static chamber technique | S. alterniflora | - | - | 10-12 |
| DeLaune *et al.,* (2002) | USM | 29.16, -90.21 | USA | 44.24 | Static chamber technique | S. alterniflora | - | - | 10-12 |
| DeLaune *et al.,* (2002) | USM | 29.16, -90.21 | USA | 32.76 | Static chamber technique | S. alterniflora | - | - | 10-12 |
| DeLaune *et al.,* (2002) | USM | 29.16, -90.21 | USA | 21.81 | Static chamber technique | S. alterniflora | - | - | 10-12 |
| DeLaune *et al.,* (2002) | USM | 29.16, -90.21 | USA | 44.59 | Static chamber technique | S. alterniflora | - | - | 10-12 |
| DeLaune *et al.,* (2002) | USM | 29.16, -90.21 | USA | 118.87 | Static chamber technique | S. alterniflora | - | - | 10-12 |
| DeLaune *et al.,* (2002) | USM | 29.16, -90.21 | USA | 13.23 | Static chamber technique | S. alterniflora | - | - | 10-12 |
| DeLaune *et al.,* (2002) | USM | 29.16, -90.21 | USA | 17.52 | Static chamber technique | S. alterniflora | - | - | 10-12 |
| DeLaune *et al.,* (2002) | USM | 29.55, -90.25 | USA | 4.99 | Static chamber technique | S. patens | - | - | 5-8 |
| DeLaune *et al.,* (2002) | USM | 29.55, -90.25 | USA | 5.69 | Static chamber technique | S. patens | - | - | 5-8 |
| DeLaune *et al.,* (2002) | USM | 29.55, -90.25 | USA | 16.38 | Static chamber technique | S. patens | - | - | 5-8 |
| DeLaune *et al.,* (2002) | USM | 29.55, -90.25 | USA | 5.17 | Static chamber technique | S. patens | - | - | 5-8 |
| DeLaune *et al.,* (2002) | USM | 29.55, -90.25 | USA | 6.39 | Static chamber technique | S. patens | - | - | 5-8 |
| DeLaune *et al.,* (2002) | USM | 29.55, -90.25 | USA | 5.52 | Static chamber technique | S. patens | - | - | 5-8 |
| DeLaune *et al.,* (2002) | USM | 29.55, -90.25 | USA | 5.69 | Static chamber technique | S. patens | - | - | 5-8 |
| DeLaune *et al.,* (2002) | USM | 29.55, -90.25 | USA | 4.47 | Static chamber technique | S. patens | - | - | 5-8 |
| DeLaune *et al.,* (2002) | USM | 29.55, -90.25 | USA | 9.72 | Static chamber technique | S. patens | - | - | 5-8 |
| DeLaune *et al.,* (2002) | USM | 29.55, -90.25 | USA | 8.67 | Static chamber technique | S. patens | - | - | 5-8 |
| DeLaune *et al.,* (2002) | USM | 29.55, -90.25 | USA | 8.32 | Static chamber technique | S. patens | - | - | 5-8 |
| This study | USM | 51.83, 0.97 | UK | -3.81112E-06 | Static chamber technique | - | - | - | - |
| This study | USM | 51.78, 0.84 | UK | -1.64157E-07 | Static chamber technique | - | - | - | - |
| This study | USM | 51.79, 0.92 | UK | 3.50516E-07 | Static chamber technique | - | - | - | - |
| This study | USM | 51.83, 0.96 | UK | -2.13495E-07 | Static chamber technique | - | - | - | - |
| This study | RSM | 51.83, 0.96 | UK | -3.42635E-06 | Static chamber technique | - | - | - | - |
| This study | RSM | 51.83, 0.96 | UK | 1.33815E-07 | Static chamber technique | - | - | - | - |
| This study | RSM | 51.83, 0.96 | UK | -1.56361E-08 | Static chamber technique | - | - | - | - |
| **Chloroform** | | | | | | | | | |
| Cox *et al.,* (2004) | USM | -40.75, 144.88 | Australia | 0.64 | Static chamber technique | P. arbuscula | - | - | - |
| Rhew *et al*., (2008) | USM | 32.47, -117.13 | USA | 936.83 | Static chamber technique | - | - | - | - |
| Rhew *et al*., (2008) | USM | 32.58, -117.15 | USA | 400.88 | Static chamber technique | - | - | - | - |
| This study | USM | 51.83, 0.97 | UK | 3.223E-05 | Static chamber technique | - | - | - | - |
| This study | USM | 51.78, 0.84 | UK | 2.79103E-05 | Static chamber technique | - | - | - | - |
| This study | USM | 51.79, 0.92 | UK | 3.48875E-06 | Static chamber technique | - | - | - | - |
| This study | USM | 51.83, 0.96 | UK | 1.83899E-06 | Static chamber technique | - | - | - | - |
| Wang *et al.*, (2016) | USM | 33.16, -79.14 | USA | 3.13 | Static chamber technique | - | - | - | 18 |
| Wang *et al.,* (2007) | USM | 33.36, 120.36 | China | -14.37 | Static chamber technique | S. alterniflora | 18.7 | 1040 | - |
| Wang *et al.,* (2007) | USM | 33.36, 120.36 | China | -1.66 | Static chamber technique | S. alterniflora | 18.7 | 1040 | - |
| Wang *et al.,* (2007) | USM | 33.36, 120.36 | China | -6.63 | Static chamber technique | S. alterniflora | 18.7 | 1040 | - |
| Wang *et al.,* (2007) | USM | 33.36, 120.36 | China | -140.98 | Static chamber technique | S. alterniflora | 18.7 | 1040 | - |
| Wang *et al.,* (2007) | USM | 33.36, 120.36 | China | 78.14 | Static chamber technique | S. alterniflora | 18.7 | 1040 | - |
| Wang *et al.,* (2007) | USM | 33.36, 120.36 | China | -9.77 | Static chamber technique | S. salsa | 18.7 | 1040 | - |
| Wang *et al.,* (2007) | USM | 33.36, 120.36 | China | 48.10 | Static chamber technique | S. salsa | 18.7 | 1040 | - |
| Wang *et al.,* (2007) | USM | 33.36, 120.36 | China | -2.40 | Static chamber technique | A. littoralis | 18.7 | 1040 | - |
| Wang *et al.,* (2007) | USM | 33.36, 120.36 | China | 11.06 | Static chamber technique | A. littoralis | 18.7 | 1040 | - |
| Wang *et al., (*2021) | USM | 33.36, 120.36 | China | -2.45 | - | S. alterniflora, S. salsa, P. australis | - | - | - |
| Wang *et al., (*2021) | USM | 33.36, 120.36 | China | 4.02 | - | S. alterniflora, S. salsa, P. australis | - | - | - |
| This study | RSM | 51.78, 0.84 | UK | 7.63739E-05 | Static chamber technique | - | - | - | - |
| This study | RSM | 51.79, 0.92 | UK | 2.2981E-06 | Static chamber technique | - | - | - | - |
| This study | RSM | 51.83, 0.96 | UK | 3.04185E-06 | Static chamber technique | - | - | - | - |
| Wang *et al.,* (2007) | MF | 33.36, 120.36 | China | -1.29 | Static chamber technique | - | 18.7 | 1040 | - |
| Wang *et al.,* (2007) | MF | 33.36, 120.36 | China | -46.07 | Static chamber technique | - | 18.7 | 1040 | - |
| Wang *et al.,* (2007) | MF | 33.36, 120.36 | China | -35.38 | Static chamber technique | - | 18.7 | 1040 | - |
| Wang *et al.,* (2007) | MF | 33.36, 120.36 | China | -56.76 | Static chamber technique | - | 18.7 | 1040 | - |
| **Methyl bromide** | | | | | | | | | |
| Blei *et al.,* (2010) | USM | 56.10, -2.35 | UK | 2.40 | Static chamber technique | P. maritima | - | - | - |
| Blei *et al.,* (2010) | USM | 56.10, -2.35 | UK | 4.53 | Static chamber technique | P. maritima | - | - | - |
| Blei *et al.,* (2010) | USM | 56.10, -2.35 | UK | 3.11 | Static chamber technique | P. maritima | - | - | - |
| Blei *et al.,* (2010) | USM | 56.10, -2.35 | UK | 2.95 | Static chamber technique | P. maritima | - | - | - |
| Blei *et al.,* (2010) | USM | 56.10, -2.35 | UK | 3.12 | Static chamber technique | A. maritima | - | - | - |
| Blei *et al.,* (2010) | USM | 56.10, -2.35 | UK | 4.63 | Static chamber technique | P. maritima | - | - | - |
| Blei *et al.,* (2010) | USM | 56.10, -2.35 | UK | 3.94 | Static chamber technique | T. maritima | - | - | - |
| Blei *et al.,* (2010) | USM | 56.10, -2.35 | UK | 5.97 | Static chamber technique | P. maritima | - | - | - |
| Blei *et al.,* (2010) | USM | 54.58, -3.29 | UK | 7.52 | Static chamber technique | P. maritima | - | - | - |
| Blei *et al.,* (2010) | USM | 54.58, -3.29 | UK | 5.62 | Static chamber technique | P. maritima | - | - | - |
| Blei *et al.,* (2010) | USM | 54.58, -3.29 | UK | 1.87 | Static chamber technique | P. maritima | - | - | - |
| Blei *et al.,* (2010) | USM | 54.58, -3.29 | UK | 3.57 | Static chamber technique | P. maritima | - | - | - |
| Blei *et al.,* (2010) | USM | 54.58, -3.29 | UK | 4.34 | Static chamber technique | P. maritima | - | - | - |
| Blei *et al.,* (2010) | USM | 54.58, -3.29 | UK | 4.57 | Static chamber technique | T. maritima | - | - | - |
| Blei *et al.,* (2010) | USM | 54.58, -3.29 | UK | 1.29 | Static chamber technique | J. geradi | - | - | - |
| Blei *et al.,* (2010) | USM | 54.58, -3.29 | UK | 1.73 | Static chamber technique | P. maritima | - | - | - |
| Blei *et al.,* (2010) | USM | 54.58, -3.29 | UK | 1.59 | Static chamber technique | C. binerva | - | - | - |
| Blei *et al.,* (2010) | USM | 54.58, -3.29 | UK | 1.17 | Static chamber technique | T. maritia | - | - | - |
| Cox *et al.,* (2004) | USM | -40.75, 144.88 | Australia | 1.66 | Static chamber technique | P. arbuscula | - | - | - |
| Drewer *et al.,* (2006) | USM | 56.00, -2.35 | UK | 3.07 | Static chamber technique | - | - | - | - |
| Manley *et al.,* (2006) | USM | 33.38, -117.52 | USA | 2.80 | Incubation chamber | S. foliosa | - | - | - |
| Manley *et al.,* (2006) | USM | 33.38, -117.52 | USA | 3.20 | Incubation chamber | S. virginica | - | - | - |
| Manley *et al.,* (2006) | USM | 33.38, -117.52 | USA | 230.00 | Incubation chamber | B. maritima | - | - | - |
| Manley *et al.,* (2006) | USM | 33.38, -117.52 | USA | 340.00 | Incubation chamber | F. grandifolia | - | - | - |
| Rhew and Mazeas, (2010) | USM | 37.55, -122.42 | USA | 24.60 | Static chamber technique | - | - | - | - |
| Rhew and Mazeas, (2010) | USM | 37.55, -122.42 | USA | 45.05 | Static chamber technique | F. grandifolia | - | - | - |
| Rhew and Mazeas, (2010) | USM | 38.00, -122.29 | USA | 2.88 | Static chamber technique | J. carnosa, D. spicata | - | - | - |
| Rhew and Mazeas, (2010) | USM | 38.00, -122.29 | USA | 0.49 | Static chamber technique | S. foliosa | - | - | - |
| Rhew *et al.,* (2000) | USM | 32.47, -117.13 | USA | 4.85 | Static chamber technique | M. littoralis | - | - | - |
| Rhew *et al.,* (2000) | USM | 32.47, -117.13 | USA | 12.13 | Static chamber technique | M. littoralis | - | - | - |
| Rhew *et al.,* (2000) | USM | 32.47, -117.13 | USA | 214.85 | Static chamber technique | B. maritima, S. bigelovii | - | - | - |
| Rhew *et al.,* (2000) | USM | 32.47, -117.13 | USA | 20.10 | Static chamber technique | B. maritima, S. bigelovii | - | - | - |
| Rhew *et al.,* (2000) | USM | 32.47, -117.13 | USA | 107.08 | Static chamber technique | B. maritima, S. bigelovii | - | - | - |
| Rhew *et al.,* (2000) | USM | 32.47, -117.13 | USA | 97.03 | Static chamber technique | S. virginica | - | - | - |
| Rhew *et al.,* (2000) | USM | 32.47, -117.13 | USA | 12.48 | Static chamber technique | S. virginica | - | - | - |
| Rhew *et al.,* (2000) | USM | 32.47, -117.13 | USA | 39.16 | Static chamber technique | S. virginica | - | - | - |
| Rhew *et al.,* (2000) | USM | 32.47, -117.13 | USA | 1.56 | Static chamber technique | S. foliosa | - | - | - |
| Rhew *et al.,* (2000) | USM | 32.47, -117.13 | USA | 0.79 | Static chamber technique | S. foliosa | - | - | - |
| Rhew *et al.,* (2000) | USM | 32.47, -117.13 | USA | 5.34 | Static chamber technique | S. foliosa | - | - | - |
| Rhew *et al.,* (2000) | USM | 32.58, -117.15 | USA | 0.12 | Static chamber technique | D. spicata | - | - | - |
| Rhew *et al.,* (2000) | USM | 32.58, -117.15 | USA | 0.16 | Static chamber technique | D. spicata | - | - | - |
| Rhew *et al.,* (2000) | USM | 32.58, -117.15 | USA | 0.66 | Static chamber technique | D. spicata | - | - | - |
| Rhew *et al.,* (2000) | USM | 32.58, -117.15 | USA | 273.76 | Static chamber technique | F. grandfolia | - | - | - |
| Rhew *et al.,* (2000) | USM | 32.58, -117.15 | USA | 86.63 | Static chamber technique | F. grandfolia | - | - | - |
| Rhew *et al.,* (2000) | USM | 32.58, -117.15 | USA | 280.69 | Static chamber technique | F. grandfolia | - | - | - |
| Rhew *et al.,* (2000) | USM | 32.58, -117.15 | USA | 25.30 | Static chamber technique | S. subtermanalis | - | - | - |
| Rhew *et al.,* (2000) | USM | 32.58, -117.15 | USA | 1.80 | Static chamber technique | S. subtermanalis | - | - | - |
| Rhew *et al.,* (2000) | USM | 32.58, -117.15 | USA | 3.26 | Static chamber technique | S. subtermanalis | - | - | - |
| Rhew *et al.,* (2000) | USM | 32.58, -117.15 | USA | 2.46 | Static chamber technique | S. virginiva | - | - | - |
| Rhew *et al.,* (2000) | USM | 32.58, -117.15 | USA | 1.21 | Static chamber technique | S. virginiva | - | - | - |
| Rhew *et al.,* (2000) | USM | 32.58, -117.15 | USA | 1.63 | Static chamber technique | S. virginiva | - | - | - |
| Rhew *et al.,* (2000) | USM | 32.58, -117.15 | USA | 0.18 | Static chamber technique | S. foliosa | - | - | - |
| Rhew *et al.,* (2000) | USM | 32.58, -117.15 | USA | 0.44 | Static chamber technique | S. foliosa | - | - | - |
| Rhew *et al.,* (2000) | USM | 32.58, -117.15 | USA | 1.25 | Static chamber technique | S. foliosa | - | - | - |
| Rhew *et al.,* (2014) | USM | 27.52, -97.03 | USA | 1039.59 | Static chamber technique | B. maritima | - | - | - |
| Rhew *et al.,* (2014) | USM | 27.38, -97.12 | USA | 450.49 | Static chamber technique | B. maritima | - | - | - |
| Rhew *et al.,* (2014) | USM | 27.38, -97.12 | USA | 450.49 | Static chamber technique | B. maritima | - | - | - |
| Rhew *et al.,* (2014) | USM | 27.38, -97.12 | USA | 935.63 | Static chamber technique | B. maritima | - | - | - |
| Rhew *et al.,* (2014) | USM | 27.38, -97.12 | USA | 693.06 | Static chamber technique | B. maritima | - | - | - |
| Rhew *et al.,* (2014) | USM | 27.38, -97.12 | USA | 242.57 | Static chamber technique | B. maritima | - | - | - |
| Rhew *et al.,* (2014) | USM | 27.38, -97.12 | USA | 370.79 | Static chamber technique | B. maritima | - | - | - |
| This study | USM | 51.83, 0.97 | UK | 3.82E-05 | Static chamber technique | - | - | - | - |
| This study | USM | 51.78, 0.84 | UK | 9.88E-06 | Static chamber technique | - | - | - | - |
| This study | USM | 51.79, 0.92 | UK | 4.50E-06 | Static chamber technique | - | - | - | - |
| This study | USM | 51.83, 0.96 | UK | 1.53E-06 | Static chamber technique | - | - | - | - |
| This study | RSM | 51.78, 0.84 | UK | 2.85E-05 | Static chamber technique | - | - | - | - |
| This study | RSM | 51.79, 0.92 | UK | 4.40E-06 | Static chamber technique | - | - | - | - |
| This study | RSM | 51.83, 0.96 | UK | 1.16E-05 | Static chamber technique | - | - | - | - |
| **Methyl chloride** | | | | | | | | | |
| Blei *et al.,* (2010) | USM | 56.10, -2.35 | UK | 4.23 | Static chamber technique | P. maritima | - | - | - |
| Blei *et al.,* (2010) | USM | 56.10, -2.35 | UK | 13.32 | Static chamber technique | P. maritima | - | - | - |
| Blei *et al.,* (2010) | USM | 56.10, -2.35 | UK | 12.96 | Static chamber technique | P. maritima | - | - | - |
| Blei *et al.,* (2010) | USM | 56.10, -2.35 | UK | 9.64 | Static chamber technique | P. maritima | - | - | - |
| Blei *et al.,* (2010) | USM | 56.10, -2.35 | UK | 5.47 | Static chamber technique | A. maritima | - | - | - |
| Blei *et al.,* (2010) | USM | 56.10, -2.35 | UK | 5.12 | Static chamber technique | P. maritima | - | - | - |
| Blei *et al.,* (2010) | USM | 56.10, -2.35 | UK | 3.36 | Static chamber technique | T. maritima | - | - | - |
| Blei *et al.,* (2010) | USM | 56.10, -2.35 | UK | 8.32 | Static chamber technique | P. maritima | - | - | - |
| Blei *et al.,* (2010) | USM | 54.58, -3.29 | UK | 8.44 | Static chamber technique | P. maritima | - | - | - |
| Blei *et al.,* (2010) | USM | 54.58, -3.29 | UK | 5.99 | Static chamber technique | P. maritima | - | - | - |
| Blei *et al.,* (2010) | USM | 54.58, -3.29 | UK | 4.56 | Static chamber technique | P. maritima | - | - | - |
| Blei *et al.,* (2010) | USM | 54.58, -3.29 | UK | 5.24 | Static chamber technique | P. maritima | - | - | - |
| Blei *et al.,* (2010) | USM | 54.58, -3.29 | UK | 43.36 | Static chamber technique | P. maritima | - | - | - |
| Blei *et al.,* (2010) | USM | 54.58, -3.29 | UK | 22.25 | Static chamber technique | T. maritima | - | - | - |
| Blei *et al.,* (2010) | USM | 54.58, -3.29 | UK | 2.23 | Static chamber technique | J. geradi | - | - | - |
| Blei *et al.,* (2010) | USM | 54.58, -3.29 | UK | 0.95 | Static chamber technique | P. maritima | - | - | - |
| Blei *et al.,* (2010) | USM | 54.58, -3.29 | UK | 8.34 | Static chamber technique | C. binerva | - | - | - |
| Blei *et al.,* (2010) | USM | 54.58, -3.29 | UK | 21.72 | Static chamber technique | T. maritia | - | - | - |
| Cox *et al.,* (2004) | USM | -40.75, 144.88 | Australia | 2.63 | Static chamber technique | P. arbuscula | - | - | - |
| Manley *et al.,* (2006) | USM | 33.38, -117.52 | USA | 12.00 | Incubation chamber | S. foliosa | - | - | - |
| Manley *et al.,* (2006) | USM | 33.38, -117.52 | USA | 12.00 | Incubation chamber | S. virginica | - | - | - |
| Manley *et al.,* (2006) | USM | 33.38, -117.52 | USA | 1400.00 | Incubation chamber | B. maritima | - | - | - |
| Manley *et al.,* (2006) | USM | 33.38, -117.52 | USA | 2600.00 | Incubation chamber | F. grandifolia | - | - | - |
| Rhew and Mazeas, (2010) | USM | 37.55, -122.42 | USA | 110.57 | Static chamber technique | - | - | - | - |
| Rhew and Mazeas, (2010) | USM | 37.55, -122.42 | USA | 276.43 | Static chamber technique | F. grandifolia | - | - | - |
| Rhew and Mazeas, (2010) | USM | 38.00, -122.29 | USA | 16.59 | Static chamber technique | J. carnosa, D. spicata | - | - | - |
| Rhew and Mazeas, (2010) | USM | 38.00, -122.29 | USA | 4.05 | Static chamber technique | S. foliosa | - | - | - |
| Rhew *et al.,* (2000) | USM | 32.47, -117.13 | USA | 31.33 | Static chamber technique | M. littoralis | - | - | - |
| Rhew *et al.,* (2000) | USM | 32.47, -117.13 | USA | 97.67 | Static chamber technique | M. littoralis | - | - | - |
| Rhew *et al.,* (2000) | USM | 32.47, -117.13 | USA | 2580.04 | Static chamber technique | B. maritima, S. bigelovii | - | - | - |
| Rhew *et al.,* (2000) | USM | 32.47, -117.13 | USA | 123.47 | Static chamber technique | B. maritima, S. bigelovii | - | - | - |
| Rhew *et al.,* (2000) | USM | 32.47, -117.13 | USA | 903.01 | Static chamber technique | B. maritima, S. bigelovii | - | - | - |
| Rhew *et al.,* (2000) | USM | 32.47, -117.13 | USA | 939.87 | Static chamber technique | S. virginica | - | - | - |
| Rhew *et al.,* (2000) | USM | 32.47, -117.13 | USA | 116.10 | Static chamber technique | S. virginica | - | - | - |
| Rhew *et al.,* (2000) | USM | 32.47, -117.13 | USA | 256.16 | Static chamber technique | S. virginica | - | - | - |
| Rhew *et al.,* (2000) | USM | 32.47, -117.13 | USA | 11.43 | Static chamber technique | S. foliosa | - | - | - |
| Rhew *et al.,* (2000) | USM | 32.47, -117.13 | USA | 5.99 | Static chamber technique | S. foliosa | - | - | - |
| Rhew *et al.,* (2000) | USM | 32.47, -117.13 | USA | 28.75 | Static chamber technique | S. foliosa | - | - | - |
| Rhew *et al.,* (2000) | USM | 32.58, -117.15 | USA | 0.63 | Static chamber technique | D. spicata | - | - | - |
| Rhew *et al.,* (2000) | USM | 32.58, -117.15 | USA | 0.72 | Static chamber technique | D. spicata | - | - | - |
| Rhew *et al.,* (2000) | USM | 32.58, -117.15 | USA | 3.69 | Static chamber technique | D. spicata | - | - | - |
| Rhew *et al.,* (2000) | USM | 32.58, -117.15 | USA | 4607.21 | Static chamber technique | F. grandfolia | - | - | - |
| Rhew *et al.,* (2000) | USM | 32.58, -117.15 | USA | 552.87 | Static chamber technique | F. grandfolia | - | - | - |
| Rhew *et al.,* (2000) | USM | 32.58, -117.15 | USA | 2948.62 | Static chamber technique | F. grandfolia | - | - | - |
| Rhew *et al.,* (2000) | USM | 32.58, -117.15 | USA | 55.29 | Static chamber technique | S. subtermanalis | - | - | - |
| Rhew *et al.,* (2000) | USM | 32.58, -117.15 | USA | 11.06 | Static chamber technique | S. subtermanalis | - | - | - |
| Rhew *et al.,* (2000) | USM | 32.58, -117.15 | USA | 4.05 | Static chamber technique | S. subtermanalis | - | - | - |
| Rhew *et al.,* (2000) | USM | 32.58, -117.15 | USA | 105.04 | Static chamber technique | S. virginiva | - | - | - |
| Rhew *et al.,* (2000) | USM | 32.58, -117.15 | USA | 27.64 | Static chamber technique | S. virginiva | - | - | - |
| Rhew *et al.,* (2000) | USM | 32.58, -117.15 | USA | 13.27 | Static chamber technique | S. virginiva | - | - | - |
| Rhew *et al.,* (2000) | USM | 32.58, -117.15 | USA | 1.07 | Static chamber technique | S. foliosa | - | - | - |
| Rhew *et al.,* (2000) | USM | 32.58, -117.15 | USA | 1.77 | Static chamber technique | S. foliosa | - | - | - |
| Rhew *et al.,* (2000) | USM | 32.58, -117.15 | USA | 1.79 | Static chamber technique | S. foliosa | - | - | - |
| Rhew *et al*., (2014) | USM | 27.52, -97.03 | USA | 10762.45 | Static chamber technique | B. maritima | - | - | - |
| Rhew *et al*., (2014) | USM | 27.38, -97.12 | USA | 4054.35 | Static chamber technique | B. maritima | - | - | - |
| Rhew *et al*., (2014) | USM | 27.38, -97.12 | USA | 4975.79 | Static chamber technique | B. maritima | - | - | - |
| Rhew *et al*., (2014) | USM | 27.38, -97.12 | USA | 10522.87 | Static chamber technique | B. maritima | - | - | - |
| Rhew *et al*., (2014) | USM | 27.38, -97.12 | USA | 6892.39 | Static chamber technique | B. maritima | - | - | - |
| Rhew *et al*., (2014) | USM | 27.38, -97.12 | USA | 3040.76 | Static chamber technique | B. maritima | - | - | - |
| Rhew *et al*., (2014) | USM | 27.38, -97.12 | USA | 3814.77 | Static chamber technique | B. maritima | - | - | - |
| This study | USM | 51.83, 0.97 | UK | 3.88E-05 | Static chamber technique | - | - | - | - |
| This study | USM | 51.78, 0.84 | UK | -7.47E-05 | Static chamber technique | - | - | - | - |
| This study | USM | 51.79, 0.92 | UK | 2.27E-05 | Static chamber technique | - | - | - | - |
| This study | USM | 51.83, 0.96 | UK | 1.01E-06 | Static chamber technique | - | - | - | - |
| Wang *et al.,* (2006A) | USM | 33.36, 120.36 | China | -82.38 | Static chamber technique | S. alterniflora | 18.7 | 1040 | - |
| Wang *et al.,* (2006A) | USM | 33.36, 120.36 | China | -23.40 | Static chamber technique | S. alterniflora | 18.7 | 1040 | - |
| Wang *et al.,* (2006A) | USM | 33.36, 120.36 | China | -540.52 | Static chamber technique | S. alterniflora | 18.7 | 1040 | - |
| Wang *et al.,* (2006A) | USM | 33.36, 120.36 | China | -223.17 | Static chamber technique | S. alterniflora | 18.7 | 1040 | - |
| Wang *et al.,* (2006A) | USM | 33.36, 120.36 | China | 4.98 | Static chamber technique | S. alterniflora | 18.7 | 1040 | - |
| Wang *et al.,* (2006A) | USM | 33.36, 120.36 | China | -275.88 | Static chamber technique | S. alterniflora | 18.7 | 1040 | - |
| Wang *et al.,* (2006A) | USM | 33.36, 120.36 | China | -310.34 | Static chamber technique | S. salsa | 18.7 | 1040 | - |
| Wang *et al.,* (2006A) | USM | 33.36, 120.36 | China | 5.90 | Static chamber technique | S. salsa | 18.7 | 1040 | - |
| Wang *et al.,* (2006A) | USM | 33.36, 120.36 | China | -263.16 | Static chamber technique | A. littoralis | 18.7 | 1040 | - |
| Wang *et al.,* (2006A) | USM | 33.36, 120.36 | China | 168.26 | Static chamber technique | A. littoralis | 18.7 | 1040 | - |
| This study | RSM | 51.78, 0.84 | UK | -2.23E-05 | Static chamber technique | - | - | - | - |
| This study | RSM | 51.79, 0.92 | UK | 1.95E-06 | Static chamber technique | - | - | - | - |
| This study | RSM | 51.83, 0.96 | UK | 2.01E-05 | Static chamber technique | - | - | - | - |
| Wang *et al.,* (2006A) | MF | 33.36, 120.36 | China | 785.62 | Static chamber technique | - | 18.7 | 1040 | - |
| Wang *et al.,* (2006A) | MF | 33.36, 120.36 | China | -518.40 | Static chamber technique | - | 18.7 | 1040 | - |
| Wang *et al.,* (2006A) | MF | 33.36, 120.36 | China | -14.37 | Static chamber technique | - | 18.7 | 1040 | - |
| Wang *et al.,* (2006A) | MF | 33.36, 120.36 | China | -22.11 | Static chamber technique | - | 18.7 | 1040 | - |
| **Methyl chloroform** | | | | | | | | | |
| Rhew *et al.,* (2008) | USM | 32.47, -117.13 | USA | 19.48 | Static chamber technique | - | - | - | - |
| Rhew *et al.,* (2008) | USM | 32.58, -117.15 | USA | -4.87 | Static chamber technique | - | - | - | - |
| Wang *et al.,* (2006B) | USM | 33.36, 120.36 | China | -433.84 | Static chamber technique | S. alterniflora | 18.7 | 1040 | - |
| Wang *et al.,* (2006B) | USM | 33.36, 120.36 | China | -164.58 | Static chamber technique | S. alterniflora | 18.7 | 1040 | - |
| Wang *et al.,* (2006B) | USM | 33.36, 120.36 | China | -1442.71 | Static chamber technique | S. alterniflora | 18.7 | 1040 | - |
| Wang *et al.,* (2006B) | USM | 33.36, 120.36 | China | -1559.57 | Static chamber technique | S. alterniflora | 18.7 | 1040 | - |
| Wang *et al.,* (2006B) | USM | 33.36, 120.36 | China | 167.01 | Static chamber technique | S. alterniflora | 18.7 | 1040 | - |
| Wang *et al.,* (2006B) | USM | 33.36, 120.36 | China | -1022.51 | Static chamber technique | S. salsa | 18.7 | 1040 | - |
| Wang *et al.,* (2006B) | USM | 33.36, 120.36 | China | 378.33 | Static chamber technique | S. salsa | 18.7 | 1040 | - |
| Wang *et al.,* (2006B) | USM | 33.36, 120.36 | China | -977.72 | Static chamber technique | A. littoralis | 18.7 | 1040 | - |
| Wang *et al.,* (2006B) | USM | 33.36, 120.36 | China | 257.09 | Static chamber technique | A. littoralis | 18.7 | 1040 | - |
| Wang *et al.,* (2006B) | MF | 33.36, 120.36 | China | 285.33 | Static chamber technique | - | 18.7 | 1040 | - |
| Wang *et al.,* (2006B) | MF | 33.36, 120.36 | China | 58.43 | Static chamber technique | - | 18.7 | 1040 | - |
| Wang *et al.,* (2006B) | MF | 33.36, 120.36 | China | -257.09 | Static chamber technique | - | 18.7 | 1040 | - |
| Wang *et al.,* (2006B) | MF | 33.36, 120.36 | China | -346.19 | Static chamber technique | - | 18.7 | 1040 | - |
| **Methyl iodide** | | | | | | | | | |
| Cox *et al.,* (2004) | USM | -40.75, 144.88 | Australia | 2.19 | Static chamber technique | P. arbuscula | - | - | - |
| Manley *et al.,* (2006) | USM | 33.38, -117.52 | USA | 7.60 | Incubation chamber | S. foliosa | - | - | - |
| Manley *et al.,* (2006) | USM | 33.38, -117.52 | USA | 2.00 | Incubation chamber | S. virginica | - | - | - |
| Manley *et al.,* (2006) | USM | 33.38, -117.52 | USA | 16.00 | Incubation chamber | B. maritima | - | - | - |
| Manley *et al.,* (2006) | USM | 33.38, -117.52 | USA | 25.00 | Incubation chamber | F. grandifolia | - | - | - |
| This study | USM | 51.83, 0.97 | UK | 1.50154E-05 | Static chamber technique | - | - | - | - |
| This study | USM | 51.78, 0.84 | UK | 3.18968E-06 | Static chamber technique | - | - | - | - |
| This study | USM | 51.79, 0.92 | UK | 2.60973E-06 | Static chamber technique | - | - | - | - |
| This study | USM | 51.83, 0.96 | UK | 5.75731E-07 | Static chamber technique | - | - | - | - |
| This study | RSM | 51.78, 0.84 | UK | 1.00691E-05 | Static chamber technique | - | - | - | - |
| This study | RSM | 51.79, 0.92 | UK | 2.91945E-06 | Static chamber technique | - | - | - | - |
| This study | RSM | 51.83, 0.96 | UK | 1.73721E-06 | Static chamber technique | - | - | - | - |
| **Isoprene** | | | | | | | | | |
| This study | USM | 51.83, 0.97 | UK | 3.1646E-05 | Static chamber technique | - | - | - | - |
| This study | USM | 51.78, 0.84 | UK | -2.94165E-05 | Static chamber technique | - | - | - | - |
| This study | USM | 51.79, 0.92 | UK | 1.52303E-05 | Static chamber technique | - | - | - | - |
| This study | USM | 51.83, 0.96 | UK | 9.58317E-08 | Static chamber technique | - | - | - | - |
| This study | RSM | 51.78, 0.84 | UK | -6.57885E-06 | Static chamber technique | - | - | - | - |
| This study | RSM | 51.79, 0.92 | UK | 4.98742E-06 | Static chamber technique | - | - | - | - |
| This study | RSM | 51.83, 0.96 | UK | 9.53191E-06 | Static chamber technique | - | - | - | - |

**Table S3** Atmospheric lifetimes and calculated atmospheric half-lives for forcing agents, including source of data.

| **Climate forcer** | **Atmospheric lifetime (years)** | **Atmospheric half-life (years)** | **Reference** |
| --- | --- | --- | --- |
| Carbon dioxide | 250 | 173.25 | Archer *et al*. (2009) |
| Methane | 12.4 | 8.59 | IPCC AR5, (2014) |
| Nitrous oxide | 121 | 83.85 | IPCC AR5, (2014) |
| Dimethyl sulphide | 3.29E-03 | 2.28E-03 | Bentley and Chasteen, (2004); Falbe-Hansen *et al*., (2000); Khan *et al*., (2016) |
| Hydrogen sulphide | 2.28E-04 | 1.58E-04 | Slatt *et al*., (1978); Spedding and Cope, (1984) |
| Methanethiol | 8.55578E-05 | 5.93E-05 | Bentley and Chasteen, (2004) |
| Chloroform | 0.4 | 0.28 | IPCC AR5, (2014) |
| Methyl bromide | 0.8 | 0.55 | IPCC AR5, (2014) |
| Methyl chloride | 1 | 0.69 | IPCC AR5, (2014) |
| Methyl chloroform | 5 | 3.47 | IPCC AR5, (2014) |
| Methyl iodide | 0.04 | 2.77E-02 | Zhang *et al*., (2020) |
| Isoprene | 6.84463E-05 | 4.74E-05 | Liakakou *et al*., (2007) |

**Table S4** Radiative efficiencies for forcing agents, including source of data. For dimethyl sulphide, hydrogen sulphide, methanethiol, and isoprene, the sources of information used to calculate the radiative efficiency are provided.

| **Climate forcer** | **Radiative efficiency (W m-2 ppb-1)** | **Reference** |
| --- | --- | --- |
| Carbon dioxide | 1.37E-05 | IPCC AR5, (2014) |
| Methane | 3.63E-04 | IPCC AR5, (2014) |
| Nitrous oxide | 3.00E-03 | IPCC AR5, (2014) |
| Dimethyl sulphide | -0.347 | Thomas *et al*., (2010); Thomas *et al*., (2011) |
| Hydrogen sulphide | -0.347 | Thomas *et al*., (2010); Thomas *et al*., (2011) |
| Methanethiol | -0.347 | Thomas *et al*., (2010); Thomas *et al*., (2011) |
| Chloroform | 0.08 | IPCC AR5, (2014) |
| Methyl bromide | 0.004 | IPCC AR5, (2014) |
| Methyl chloride | 0.01 | IPCC AR5, (2014) |
| Methyl chloroform | 0.07 | IPCC AR5, (2014) |
| Methyl iodide | 2.00E-04 | Estimated based on GWP (Solomon *et al*., (1994)) relative to other methyl halides |
| Isoprene | 0.00378 | Pacifico *et al*. (2009) (Radiative efficiency was calculated the same way as for sulphur compounds, as described in section 2.3.2.5. |

**Table S5** Ozone depletion potentials for halocarbons, including source of data.

| **Climate forcers** | **Ozone depletion potential (ODP)** | **Reference** |
| --- | --- | --- |
| Chloroform | 0.02 | Claxton *et al*., (2019) |
| Methyl bromide | 0.6 | UK Government, (2020) |
| Methyl chloride | 0.02 | Wuebbles, (2015) |
| Methyl chloroform | 0.1 | UK Government, (2020) |
| Methyl iodide | 0.034 | Zhang *et al*., (2020) |

To calculate ozone’s radiative forcing, atmospheric ozone data between 1979-1998 (NASA, 2021) was divided by 0.9 to remove the proportion approximately equivalent to tropospheric ozone. Then, DU were converted in molecules per m-2. The difference in the number of ozone molecule between 1979 and 1998 was then calculated, and the result was divided by -0.05 – the radiative forcing for ozone for that period – to calculate the radiative efficiency of ozone per molecule (W m-2 molecule-1).

Finally, using the ozone radiative efficiency value, the ozone depletion radiative forcing for each annual emission was calculated according to the formula described in section 2.3.2.3 Ozone Depletion.

**Supplementary References**

Adams, D.F., Farwell, S.O., Robinson, E., Pack, M.R. and Bamesberger, W.L., 1981. Biogenic sulfur source strengths. *Environmental Science & Technology*, *15*(12), pp.1493-1498.

Adams, C.A., Andrews, J.E. and Jickells, T., 2012. Nitrous oxide and methane fluxes vs. carbon, nitrogen and phosphorous burial in new intertidal and saltmarsh sediments. *Science of the Total Environment*, *434*, pp.240-251.

Aneja, V.P., Overton Jr, J.H., Cupitt, L.T., Durham, J.L. and Wilson, W.E., 1979. Direct measurements of emission rates of some atmospheric biogenic sulfur compounds. *Tellus*, *31*(2), pp.174-178.

Andersen, T.J., Svinth, S. and Pejrup, M., 2011. Temporal variation of accumulation rates on a natural salt marsh in the 20th century—The impact of sea level rise and increased inundation frequency. *Marine Geology*, *279*(1-4), pp.178-187.

Andrews, J.E., Samways, G. and Shimmield, G.B., 2008. Historical storage budgets of organic carbon, nutrient and contaminant elements in saltmarsh sediments: Biogeochemical context for managed realignment, Humber Estuary, UK. *Science of the total environment*, *405*(1-3), pp.1-13.

Anisfeld, S.C., Tobin, M.J. and Benoit, G., 1999. Sedimentation rates in flow-restricted and restored salt marshes in Long Island Sound. *Estuaries*, *22*(2), pp.231-244.

Archer, D., Eby, M., Brovkin, V., Ridgwell, A., Cao, L., Mikolajewicz, U., Caldeira, K., Matsumoto, K., Munhoven, G., Montenegro, A. and Tokos, K., 2009. Atmospheric lifetime of fossil fuel carbon dioxide. *Annual review of earth and planetary sciences*, *37*, pp.117-134.

Arriola, J.M. and Cable, J.E., 2017. Variations in carbon burial and sediment accretion along a tidal creek in a Florida salt marsh. *Limnology and Oceanography*, *62*(S1), pp. S15-S28.

Artigas, F., Shin, J.Y., Hobble, C., Marti-Donati, A., Schäfer, K.V. and Pechmann, I., 2015. Long term carbon storage potential and CO2 sink strength of a restored salt marsh in New Jersey. *Agricultural and Forest Meteorology*, *200*, pp.313-321.

Atkinson, L.P. and Hall, J.R., 1976. Methane distribution and production in the Georgia salt marsh. *Estuarine and Coastal Marine Science*, *4*(6), pp.677-686.

Azad, M.A.K., Ohira, S.I., Oda, M. and Toda, K., 2005. On-site measurements of hydrogen sulfide and sulfur dioxide emissions from tidal flat sediments of Ariake Sea, Japan. *Atmospheric Environment*, *39*(33), pp.6077-6087.

Bartlett, K.B., Bartlett, D.S., Harriss, R.C. and Sebacher, D.I., 1987. Methane emissions along a salt marsh salinity gradient. *Biogeochemistry*, *4*(3), pp.183-202.

Bartlett, K.B., Harriss, R.C. and Sebacher, D.I., 1985. Methane flux from coastal salt marshes. *Journal of Geophysical Research: Atmospheres*, *90*(D3), pp.5710-5720.

Bentley, R. and Chasteen, T.G., 2004. Environmental VOSCs––formation and degradation of dimethyl sulfide, methanethiol and related materials. *Chemosphere*, *55*(3), pp.291-317.

Blei, E., Heal, M.R. and Heal, K.V., 2010. Long-term CH 3 Br and CH 3 Cl flux measurements in temperate salt marshes. *Biogeosciences*, *7*(11), pp.3657-3668.

Bu, N., Wu, S., Yang, X., Sun, Y., Chen, Z., Ma, X., Song, Y., Ma, F. and Yan, Z., 2019. Spartina alterniflora invasion affects methane emissions in the Yangtze River estuary. *Journal of Soils and Sediments*, *19*(2), pp.579-587.

Burden, A., Garbutt, R.A., Evans, C.D., Jones, D.L. and Cooper, D.M., 2013. Carbon sequestration and biogeochemical cycling in a saltmarsh subject to coastal managed realignment. *Estuarine, Coastal and Shelf Science*, *120*, pp.12-20.

Cahoon, D.R., Lynch, J.C. and Powell, A.N., 1996. Marsh vertical accretion in a southern California estuary, USA. *Estuarine, Coastal and Shelf Science*, *43*(1), pp.19-32.

Callaway, J.C., DeLaune, R.D. and Patrick Jr, W.H., 1997. Sediment accretion rates from four coastal wetlands along the Gulf of Mexico. *Journal of Coastal Research*, pp.181-191.

Callaway, J.C., Borgnis, E.L., Turner, R.E. and Milan, C.S., 2012. Carbon sequestration and sediment accretion in San Francisco Bay tidal wetlands. *Estuaries and Coasts*, *35*(5), pp.1163-1181.

Cao, L., Zhou, Z., Xu, X. and Shi, F., 2020. Spatial and temporal variations of the greenhouse gas emissions in coastal saline wetlands in southeastern China. *Environmental Science and Pollution Research*, *27*(1), pp.1118-1130.

Carroll, M.A., Heidt, L.E., Cicerone, R.J. and Prinn, R.G., 1986. OCS, H 2 S, and CS 2 fluxes from a salt water marsh. *Journal of atmospheric chemistry*, *4*(3), pp.375-395.

Cerqueira, M.A. and Pio, C.A., 1999. Production and release of dimethylsulphide from an estuary in Portugal. *Atmospheric Environment*, *33*(20), pp.3355-3366.

Champlin, L., Velinsky, D., Tucker, K., Sommerfield, C., Laurent, K.S. and Watson, E., 2020. Carbon Sequestration Rate Estimates in Delaware Bay and Barnegat Bay Tidal Wetlands Using Interpolation Mapping. *Data*, *5*(1), p.11.

Chen, Q., Guo, B., Zhao, C. and Xing, B., 2018. Characteristics of CH4 and CO2 emissions and influence of water and salinity in the Yellow River delta wetland, China. *Environmental Pollution*, *239*, pp.289-299.

Chen, J., Wang, D., Li, Y., Yu, Z., Chen, S., Hou, X., White, J.R. and Chen, Z., 2020. The carbon stock and sequestration rate in tidal flats from coastal China. *Global Biogeochemical Cycles*, *34*(11), p.e2020GB006772.

Chmura, G.L., Anisfeld, S.C., Cahoon, D.R. and Lynch, J.C., 2003. Global carbon sequestration in tidal, saline wetland soils. *Global biogeochemical cycles*, *17*(4).

Chmura, G.L., Kellman, L., Van Ardenne, L. and Guntenspergen, G.R., 2016. Greenhouse gas fluxes from salt marshes exposed to chronic nutrient enrichment. *PloS one*, *11*(2), p.e0149937.

Choi, Y. and Wang, Y., 2004. Dynamics of carbon sequestration in a coastal wetland using radiocarbon measurements. *Global Biogeochemical Cycles*, *18*(4).

Claxton, T., Hossaini, R., Wild, O., Chipperfield, M.P. and Wilson, C., 2019. On the regional and seasonal ozone depletion potential of chlorinated very short‐lived substances. *Geophysical Research Letters*, *46*(10), pp.5489-5498.

Connor, R.F., Chmura, G.L. and Beecher, C.B., 2001. Carbon accumulation in Bay of Fundy salt marshes: implications for restoration of reclaimed marshes. *Global Biogeochemical Cycles*, *15*(4), pp.943-954.

Cox, M.L., Fraser, P.J., Sturrock, G.A., Siems, S.T. and Porter, L.W., 2004. Terrestrial sources and sinks of halomethanes near Cape Grim, Tasmania. *Atmospheric environment*, *38*(23), pp.3839-3852.

Craft, C., 2007. Freshwater input structures soil properties, vertical accretion, and nutrient accumulation of Georgia and US tidal marshes. *Limnology and oceanography*, *52*(3), pp.1220-1230.

Craft, C., Broome, S. and Campbell, C., 2002. Fifteen years of vegetation and soil development after brackish‐water marsh creation. *Restoration Ecology*, *10*(2), pp.248-258.

Craft, C., Megonigal, P., Broome, S., Stevenson, J., Freese, R., Cornell, J., Zheng, L. and Sacco, J., 2003. The pace of ecosystem development of constructed Spartina alterniflora marshes. *Ecological applications*, *13*(5), pp.1417-1432.

Craft, C., Reader, J., Sacco, J.N. and Broome, S.W., 1999. Twenty‐five years of ecosystem development of constructed Spartina alterniflora (Loisel) marshes. *Ecological Applications*, *9*(4), pp.1405-1419.

Craft, C.B., Seneca, E.D. and Broome, S.W., 1993. Vertical accretion in microtidal regularly and irregularly flooded estuarine marshes. *Estuarine, Coastal and Shelf Science*, *37*(4), pp.371-386.

Cuellar-Martinez, T., Ruiz-Fernández, A.C., Sanchez-Cabeza, J.A., Pérez-Bernal, L.H. and Sandoval-Gil, J., 2019. Relevance of carbon burial and storage in two contrasting blue carbon ecosystems of a north-east Pacific coastal lagoon. *Science of The Total Environment*, *675*, pp.581-593.

Curado, G., Rubio-Casal, A.E., Figueroa, E., Grewell, B.J. and Castillo, J.M., 2013. Native plant restoration combats environmental change: development of carbon and nitrogen sequestration capacity using small cordgrass in European salt marshes. *Environmental monitoring and assessment*, *185*(10), pp.8439-8449.

Davis, J.L., Currin, C.A., O’Brien, C., Raffenburg, C. and Davis, A., 2015. Living shorelines: coastal resilience with a blue carbon benefit. *PloS one*, *10*(11), p.e0142595.

DeLaune, R.D., Devai, I. and Lindau, C.W., 2002. Flux of reduced sulfur gases along a salinity gradient in Louisiana coastal marshes. *Estuarine, Coastal and Shelf Science*, *54*(6), pp.1003-1011.

Dong, H., Qian, L., Yan, J. and Wang, L., 2020. Evaluation of the carbon accumulation capability and carbon storage of different types of wetlands in the Nanhui tidal flat of the Yangtze River estuary. *Environmental Monitoring and Assessment*, *192*(9), pp.1-12.

Drake, K., Halifax, H., Adamowicz, S.C. and Craft, C., 2015. Carbon sequestration in tidal salt marshes of the Northeast United States. *Environmental Management*, *56*(4), pp.998-1008.

Drewer, J., Heal, M.R., Heal, K.V. and Smith, K.A., 2006. Temporal and spatial variation in methyl bromide flux from a salt marsh. *Geophysical Research Letters*, *33*(16).

Drexler, J.Z., Woo, I., Fuller, C.C. and Nakai, G., 2019. Carbon accumulation and vertical accretion in a restored versus historic salt marsh in southern Puget Sound, Washington, United States. *Restoration Ecology*, *27*(5), pp.1117-1127.

Elschot, K., Bakker, J.P., Temmerman, S., van de Koppel, J. and Bouma, T.J., 2015. Ecosystem engineering by large grazers enhances carbon stocks in a tidal salt marsh. *Marine Ecology Progress Series*, *537*, pp.9-21.

Elsey-Quirk, T., Seliskar, D.M., Sommerfield, C.K. and Gallagher, J.L., 2011. Salt marsh carbon pool distribution in a mid-Atlantic lagoon, USA: sea level rise implications. *Wetlands*, *31*(1), pp.87-99.

Emery, H.E. and Fulweiler, R.W., 2017. Incomplete tidal restoration may lead to persistent high CH4 emission. *Ecosphere*, *8*(12), p.e01968.

Falbe-Hansen, H., Sørensen, S., Jensen, N.R., Pedersen, T. and Hjorth, J., 2000. Atmospheric gas-phase reactions of dimethylsulphoxide and dimethylsulphone with OH and NO3 radicals, Cl atoms and ozone. *Atmospheric Environment*, *34*(10), pp.1543-1551.

Fennessy, M.S., Ibáñez, C., Calvo-Cubero, J., Sharpe, P., Rovira, A., Callaway, J. and Caiola, N., 2019. Environmental controls on carbon sequestration, sediment accretion, and elevation change in the Ebro River Delta: Implications for wetland restoration. *Estuarine, Coastal and Shelf Science*, *222*, pp.32-42.

Forbrich, I., Giblin, A.E. and Hopkinson, C.S., 2018. Constraining marsh carbon budgets using long‐term C burial and contemporary atmospheric CO2 fluxes. *Journal of Geophysical Research: Biogeosciences*, *123*(3), pp.867-878.

Ford, H., Garbutt, A., Jones, L. and Jones, D.L., 2012. Methane, carbon dioxide and nitrous oxide fluxes from a temperate salt marsh: Grazing management does not alter Global Warming Potential. *Estuarine, Coastal and Shelf Science*, *113*, pp.182-191.

French, J.R. and Spencer, T., 1993. Dynamics of sedimentation in a tide-dominated backbarrier salt marsh, Norfolk, UK. *Marine Geology*, *110*(3-4), pp.315-331.

Gao, J., Bai, F., Yang, Y., Gao, S., Liu, Z. and Li, J., 2012. Influence of Spartina colonization on the supply and accumulation of organic carbon in tidal salt marshes of northern Jiangsu Province, China. *Journal of Coastal Research*, *28*(2), pp.486-498.

Gao, J.H., Feng, Z.X., Chen, L., Wang, Y.P., Bai, F. and Li, J., 2016. The effect of biomass variations of Spartina alterniflora on the organic carbon content and composition of a salt marsh in northern Jiangsu Province, China. *Ecological Engineering*, *95*, pp.160-170.

Gonneea, M.E., Maio, C.V., Kroeger, K.D., Hawkes, A.D., Mora, J., Sullivan, R., Madsen, S., Buzard, R.M., Cahill, N. and Donnelly, J.P., 2019. Salt marsh ecosystem restructuring enhances elevation resilience and carbon storage during accelerating relative sea-level rise. *Estuarine, Coastal and Shelf Science*, *217*, pp.56-68.

Gulliver, A., Carnell, P.E., Trevathan-Tackett, S.M., Duarte de Paula Costa, M., Masqué, P. and Macreadie, P.I., 2020. Estimating the potential blue carbon gains from tidal marsh rehabilitation: A case study from south eastern Australia. *Frontiers in Marine Science*, *7*, p.403.

He, Y., Widney, S., Ruan, M., Herbert, E., Li, X. and Craft, C., 2016. Accumulation of soil carbon drives denitrification potential and lab-incubated gas production along a chronosequence of salt marsh development. *Estuarine, Coastal and Shelf Science*, *172*, pp.72-80.

Howe, A.J., Rodríguez, J.F. and Saco, P.M., 2009. Surface evolution and carbon sequestration in disturbed and undisturbed wetland soils of the Hunter estuary, southeast Australia. *Estuarine, coastal and shelf science*, *84*(1), pp.75-83.

Howes, B.L., Dacey, J.W. and Teal, J.M., 1985. Annual carbon mineralization and belowground production of Spartina alterniflora in a New England salt marsh. *Ecology*, *66*(2), pp.595-605.

IPCC, 2013: Climate Change 2013: The Physical Science Basis. Contribution of Working Group I to the Fifth Assessment Report of the Intergovernmental Panel on Climate Change [Stocker, T.F., D. Qin, G.-K. Plattner, M. Tignor, S.K. Allen, J. Boschung, A. Nauels, Y. Xia, V. Bex and P.M. Midgley (eds.)]. Cambridge University Press, Cambridge, United Kingdom and New York, NY, USA, 1535 pp.

Jensen, L.A., Schmidt, L.B., Hollesen, J. and Elberling, B., 2006. Accumulation of soil organic carbon linked to Holocene sea level changes in west Greenland. *Arctic, Antarctic, and Alpine research*, *38*(3), pp.378-383.

Huertas, I.E., de la Paz, M., Perez, F.F., Navarro, G. and Flecha, S., 2019. Methane emissions from the salt marshes of Doñana wetlands: Spatio-temporal variability and controlling factors. *Frontiers in Ecology and Evolution*, *7*, p.32.

Jones, M.C., Bernhardt, C.E., Krauss, K.W. and Noe, G.B., 2017. The impact of late Holocene land use change, climate variability, and sea level rise on carbon storage in tidal freshwater wetlands on the southeastern United States coastal plain. *Journal of Geophysical Research: Biogeosciences*, *122*(12), pp.3126-3141.

Jiménez-Arias, J.L., Morris, E., Rubio-de-Inglés, M.J., Peralta, G., García-Robledo, E., Corzo, A. and Papaspyrou, S., 2020. Tidal elevation is the key factor modulating burial rates and composition of organic matter in a coastal wetland with multiple habitats. *Science of The Total Environment*, *724*, p.138205.

Kelleway, J.J., Saintilan, N., Macreadie, P.I., Baldock, J.A., Heijnis, H., Zawadzki, A., Gadd, P., Jacobsen, G. and Ralph, P.J., 2017. Geochemical analyses reveal the importance of environmental history for blue carbon sequestration. *Journal of Geophysical Research: Biogeosciences*, *122*(7), pp.1789-1805.

Khan, H.R., 2017. Fluxes of methane and distribution of sulfate as influenced by coastal salt-marsh soil ecosystem of Northern Germany. *Bangladesh Journal of Scientific and Industrial Research*, *52*(3), pp.177-186.

Khan, M.A.H., Gillespie, S.M.P., Razis, B., Xiao, P., Davies-Coleman, M.T., Percival, C.J., Derwent, R.G., Dyke, J.M., Ghosh, M.V., Lee, E.P.F. and Shallcross, D.E., 2016. A modelling study of the atmospheric chemistry of DMS using the global model, STOCHEM-CRI. *Atmospheric Environment*, *127*, pp.69-79.

Krull, K. and Craft, C., 2009. Ecosystem development of a sandbar emergent tidal marsh, Altamaha River Estuary, Georgia, USA. *Wetlands*, *29*(1), pp.314-322.

Li, H., Dai, S., Ouyang, Z., Xie, X., Guo, H., Gu, C., Xiao, X., Ge, Z., Peng, C. and Zhao, B., 2018A. Multi-scale temporal variation of methane flux and its controls in a subtropical tidal salt marsh in eastern China. *Biogeochemistry*, *137*(1), pp.163-179.

Li, X., Sardans, J., Hou, L., Liu, M., Xu, C. and Peñuelas, J., 2020. Climatic temperature controls the geographical patterns of coastal marshes greenhouse gases emissions over China. *Journal of Hydrology*, *590*, p.125378.

Li, Y., Wang, D., Chen, Z., Jin, H., Hu, H., Chen, J. and Yang, Z., 2018B. Role of Scirpus mariqueter on methane emission from an intertidal saltmarsh of Yangtze Estuary. *Sustainability*, *10*(4), p.1139.

Liakakou, E., Vrekoussis, M., Bonsang, B., Donousis, C., Kanakidou, M. and Mihalopoulos, N., 2007. Isoprene above the Eastern Mediterranean: Seasonal variation and contribution to the oxidation capacity of the atmosphere. *Atmospheric Environment*, *41*(5), pp.1002-1010.

Loomis, M.J. and Craft, C.B., 2010. Carbon sequestration and nutrient (nitrogen, phosphorus) accumulation in river‐dominated tidal marshes, Georgia, USA. *Soil Science Society of America Journal*, *74*(3), pp.1028-1036.

Manley, S.L., Wang, N.Y., Walser, M.L. and Cicerone, R.J., 2006. Coastal salt marshes as global methyl halide sources from determinations of intrinsic production by marsh plants. *Global Biogeochemical Cycles*, *20*(3).

McTigue, N., Davis, J., Rodriguez, A.B., McKee, B., Atencio, A. and Currin, C., 2019. Sea level rise explains changing carbon accumulation rates in a salt marsh over the past two millennia. *Journal of Geophysical Research: Biogeosciences*, *124*(10), pp.2945-2957.

Middelburg, J.J., Klaver, G., Nieuwenhuize, J., Markusse, R.M., Vlug, T. and van der Nat, F.J.W., 1995. Nitrous oxide emissions from estuarine intertidal sediments. *Hydrobiologia*, *311*(1), pp.43-55.

Nedwell, D., Embley, T.M. and Purdy, K.J., 2004. Sulphate reduction, methanogenesis and phylogenetics of the sulphate reducing bacterial communities along an estuarine gradient. *Aquatic microbial ecology*, *37*(3), pp.209-217.

Oenema, O. and DeLaune, R.D., 1988. Accretion rates in salt marshes in the Eastern Scheldt, south-west Netherlands. *Estuarine, Coastal and Shelf Science*, *26*(4), pp.379-394.

Orson, R.A., Warren, R.S. and Niering, W.A., 1998. Interpreting sea level rise and rates of vertical marsh accretion in a southern New England tidal salt marsh. *Estuarine, Coastal and Shelf Science*, *47*(4), pp.419-429.

Pacifico, F., Harrison, S.P., Jones, C.D. and Sitch, S., 2009. Isoprene emissions and climate. *Atmospheric Environment*, *43*(39), pp.6121-6135.

Palomo, L. and Niell, F.X., 2009. Primary production and nutrient budgets of Sarcocornia perennis ssp. alpini (Lag.) Castroviejo in the salt marsh of the Palmones River estuary (Southern Spain). *Aquatic Botany*, *91*(3), pp.130-136.

Patrick Jr, W.H. and DeLaune, R.D., 1990. Subsidence. accretion. and sea level rise in south San Francisco Bay marshes. *Limnology and Oceanography*, *35*(6), pp.1389-1395.

Peck, E.K., Wheatcroft, R.A. and Brophy, L.S., 2020. Controls on sediment accretion and blue carbon burial in tidal saline wetlands: insights from the Oregon Coast, USA. *Journal of Geophysical Research: Biogeosciences*, *125*(2).

Pendea, I.F. and Chmura, G.L., 2012. A high-resolution record of carbon accumulation rates during boreal peatland initiation. *Biogeosciences*, *9*(7), pp.2711-2717.

Powell, E.B., Krause, J.R., Martin, R.M. and Watson, E.B., 2020. Pond excavation reduces coastal wetland carbon dioxide assimilation. *Journal of Geophysical Research: Biogeosciences*, *125*(2), p.e2019JG005187.

Reid, M.C., Tripathee, R., Schäfer, K.V.R. and Jaffe, P.R., 2013. Tidal marsh methane dynamics: Difference in seasonal lags in emissions driven by storage in vegetated versus unvegetated sediments. *Journal of Geophysical Research: Biogeosciences*, *118*(4), pp.1802-1813.

Rhew, R. and Mazéas, O., 2010. Gross production exceeds gross consumption of methyl halides in northern California salt marshes. *Geophysical research letters*, *37*(18).

Rhew, R.C., Miller, B.R. and Weiss, R.F., 2000. Natural methyl bromide and methyl chloride emissions from coastal salt marshes. *Nature*, *403*(6767), pp.292-295.

Rhew, R.C., Miller, B.R. and Weiss, R.F., 2008. Chloroform, carbon tetrachloride and methyl chloroform fluxes in southern California ecosystems. *Atmospheric Environment*, *42*(30), pp.7135-7140.

Rhew, R.C., Whelan, M.E. and Min, D.H., 2014. Large methyl halide emissions from south Texas salt marshes. *Biogeosciences*, *11*(22), pp.6427-6434.

Roman, C.T., Peck, J.A., Allen, J.R., King, J.W. and Appleby, P.G., 1997. Accretion of a New England (USA) salt marsh in response to inlet migration, storms, and sea-level rise. *Estuarine, Coastal and Shelf Science*, *45*(6), pp.717-727.

Roner, M., D'Alpaos, A., Ghinassi, M., Marani, M., Silvestri, S., Franceschinis, E. and Realdon, N., 2016. Spatial variation of salt-marsh organic and inorganic deposition and organic carbon accumulation: Inferences from the Venice lagoon, Italy. *Advances in Water Resources*, *93*, pp.276-287.

Saintilan, N., Rogers, K., Mazumder, D. and Woodroffe, C., 2013. Allochthonous and autochthonous contributions to carbon accumulation and carbon store in southeastern Australian coastal wetlands. *Estuarine, Coastal and Shelf Science*, *128*, pp.84-92.

Senior, E., Lindström, E.B., Banat, I.M. and Nedwell, D.B., 1982. Sulfate reduction and methanogenesis in the sediment of a saltmarsh on the east coast of the United Kingdom. *Applied and environmental microbiology*, *43*(5), pp.987-996.

Shiau, Y.J., Burchell, M.R., Krauss, K.W., Broome, S.W. and Birgand, F., 2019. Carbon storage potential in a recently created brackish marsh in eastern North Carolina, USA. *Ecological Engineering*, *127*, pp.579-588.

Slatt, B.J., Natusch, D.F., Prospero, J.M. and Savoie, D.L., 1978. Hydrogen sulfide in the atmosphere of the northern equatorial Atlantic Ocean and its relation to the global sulfur cycle. *Atmospheric Environment (1967)*, *12*(5), pp.981-991.

Solomon, S., Burkholder, J.B., Ravishankara, A.R. and Garcia, R.R., 1994. Ozone depletion and global warming potentials of CF3I. *Journal of Geophysical Research: Atmospheres*, *99*(D10), pp.20929-20935.

Song, H., Liu, X., Yu, W. and Wang, L., 2018. Seasonal and Spatial Variation of Nitrogen Oxide Fluxes from Human-Disturbance Coastal Wetland in the Yellow River Estuary. *Wetlands*, *38*(5), pp.945-955.

Sousa, A.I., Lillebø, A.I., Pardal, M.A. and Caçador, I., 2010. The influence of Spartina maritima on carbon retention capacity in salt marshes from warm-temperate estuaries. *Marine pollution bulletin*, *61*(4-6), pp.215-223.

Spedding, D.J. and Cope, D.M., 1984. Field measurements of hydrogen sulphide oxidation. *Atmospheric Environment (1967)*, *18*(9), pp.1791-1795.

Staver, L. W. *et al.* (2020) ‘Tidal marsh restoration at poplar island: II. Elevation trends, vegetation development, and carbon dynamics’, *Wetlands*, 40(6), pp. 1687–1701.

Steudler, P.A. and Peterson, B.J., 1985. Annual cycle of gaseous sulfur emissions from a New England Spartina alterniflora marsh. *Atmospheric Environment (1967)*, *19*(9), pp.1411-1416.

Sun, Z., Wang, L., Mou, X., Jiang, H. and Sun, W., 2014. Spatial and temporal variations of nitrous oxide flux between coastal marsh and the atmosphere in the Yellow River estuary of China. *Environmental Science and Pollution Research*, *21*(1), pp.419-433.

Sun, Z., Wang, L., Tian, H., Jiang, H., Mou, X. and Sun, W., 2013. Fluxes of nitrous oxide and methane in different coastal Suaeda salsa marshes of the Yellow River estuary, China. *Chemosphere*, *90*(2), pp.856-865.

Thomas, M.A., Suntharalingam, P., Pozzoli, L., Devasthale, A., Kloster, S., Rast, S., Feichter, J. and Lenton, T.M., 2011. Rate of non-linearity in DMS aerosol-cloud-climate interactions. *Atmospheric Chemistry and Physics*, *11*(21), pp.11175-11183.

Thomas, M.A., Suntharalingam, P., Pozzoli, L., Rast, S., Devasthale, A., Kloster, S., Feichter, J. and Lenton, T.M., 2010. Quantification of DMS aerosol-cloud-climate interactions using the ECHAM5-HAMMOZ model in a current climate scenario. *Atmospheric Chemistry and Physics*, *10*(15), pp.7425-7438.

UK Government, 2020. *Ozone-depleting substances*. [Online]. UK Government. Available at: https://www.gov.uk/guidance/ozone-depleting-substances-ods [Accessed on 09 September 2021].

Unger, V., Elsey-Quirk, T., Sommerfield, C. and Velinsky, D., 2016. Stability of organic carbon accumulating in Spartina alterniflora-dominated salt marshes of the Mid-Atlantic US. *Estuarine, Coastal and Shelf Science*, *182*, pp.179-189.

Vázquez-Lule, A. and Vargas, R., 2021. Biophysical drivers of net ecosystem and methane exchange across phenological phases in a tidal salt marsh. *Agricultural and Forest Meteorology*, *300*, p.108309.

Wang, J., Cao, Y. and Wang, J., 2021. Atmospheric concentrations and ecosystem fluxes of CH2Cl2, CHCl3 and CCl4 along tidal and vegetation gradients within a coastal salt marsh in Eastern China. *Ecological Engineering*, *160*, p.106149.

Wang, D., Chen, Z. and Xu, S., 2009A. Methane emission from Yangtze estuarine wetland, China. *Journal of Geophysical Research: Biogeosciences*, *114*(G2).

Wang, J.J., Jiao, Y., Rhew, R.C. and Chow, A.T., 2016. Haloform formation in coastal wetlands along a salinity gradient at South Carolina, United States. *Environmental Chemistry*, *13*(4), pp.745-756.

Wang, J., Li, R., Guo, Y., Qin, P. and Sun, S., 2006A. The flux of methyl chloride along an elevational gradient of a coastal salt marsh, Eastern China. *Atmospheric Environment*, *40*(34), pp.6592-6605.

Wang, J., Li, R., Guo, Y., Qin, P. and Sun, S., 2006B. Removal of methyl chloroform in a coastal salt marsh of eastern China. *Chemosphere*, *65*(8), pp.1371-1380.

Wang, Q., Song, J., Cao, L., Li, X., Yuan, H. and Li, N., 2017. Distribution and storage of soil organic carbon in a coastal wetland under the pressure of human activities. *Journal of Soils and Sediments*, *17*(1), pp.11-22.

Wang, J., Sun, S., Qin, P., Wang, J., Zhong, C. and Xin, W., 2009B, June. DMS and CH4 Fluxes along an Elevational Gradient of a Coastal Salt Marsh, East China: Positive Correlations. In *2009 3rd International Conference on Bioinformatics and Biomedical Engineering* (pp. 1-6). IEEE.

Wang, J., Qin, P. and Sun, S., 2007. The flux of chloroform and tetrachloromethane along an elevational gradient of a coastal salt marsh, East China. *Environmental pollution*, *148*(1), pp.10-20.

Wang, J. and Wang, J., 2017. Spartina alterniflora alters ecosystem DMS and CH4 emissions and their relationship along interacting tidal and vegetation gradients within a coastal salt marsh in Eastern China. *Atmospheric Environment*, *167*, pp.346-359.

Ward, R.D., 2020. Carbon sequestration and storage in Norwegian Arctic coastal wetlands: Impacts of climate change. *Science of the Total Environment*, *748*, p.141343.

Weinstein, M.P. and Kreeger, D.A. eds., 2007. *Concepts and controversies in tidal marsh ecology*. Springer Science & Business Media.

Weston, N.B., Neubauer, S.C., Velinsky, D.J. and Vile, M.A., 2014. Net ecosystem carbon exchange and the greenhouse gas balance of tidal marshes along an estuarine salinity gradient. *Biogeochemistry*, *120*(1), pp.163-189.

Witte, S. and Giani, L., 2016. Greenhouse gas emission and balance of marshes at the southern North Sea coast. *Wetlands*, *36*(1), pp.121-132.

Wollenberg, J.T., Ollerhead, J. and Chmura, G.L., 2018. Rapid carbon accumulation following managed realignment on the Bay of Fundy. *Plos one*, *13*(3), p.e0193930.

Woodwell, G., Whitney, D.E., Hall, C.A.S. and Houghton, R.A., 1977. The Flax Pond ecosystem study: exchanges of carbon in water between a salt marsh and Long Island Sound. *Limnol. Oceanogr*, *22*(5), pp.833-838.

Wuebbles, D.J., Youn, D., Patten, K., Wang, D. and Martínez-Avilés, M., 2009. Metrics for ozone and climate: Three-dimensional modeling studies of ozone depletion potentials and indirect global warming potentials. In *Twenty Years of Ozone Decline* (pp. 297-326). Springer, Dordrecht.

Xiang, J., Liu, D., Ding, W., Yuan, J. and Lin, Y., 2015. Invasion chronosequence of Spartina alterniflora on methane emission and organic carbon sequestration in a coastal salt marsh. *Atmospheric Environment*, *112*, pp.72-80.

Xinhua, L., Zhenlin, Z., Liping, Y. and Zhigao, S., 2016. Emissions of biogenic sulfur gases (H2S, COS) from Phragmites australis coastal marsh in the Yellow River estuary of China. *Chinese Geographical Science*, *26*(6), p.770.

Xinhua, L., Zhigao, S., Honghai, G. and Zhenlin, Z., 2015. The annual emissions of sulfur gases from different tidal flats in the Yellow River Delta, China. *BULGARIAN CHEMICAL COMMUNICATIONS*, *47*(3), pp.913-919.

Xu, X., Zou, X., Cao, L., Zhamangulova, N., Zhao, Y., Tang, D. and Liu, D., 2014. Seasonal and spatial dynamics of greenhouse gas emissions under various vegetation covers in a coastal saline wetland in southeast China. *Ecological Engineering*, *73*, pp.469-477.

Yang, B., Li, X., Lin, S., Xie, Z., Yuan, Y., Espenberg, M., Pärn, J. and Mander, Ü., 2020. Invasive Spartina alterniflora can mitigate N2O emission in coastal salt marshes. *Ecological Engineering*, *147*, p.105758.

Ye, S., Krauss, K.W., Brix, H., Wei, M., Olsson, L., Yu, X., Ma, X., Wang, J., Yuan, H., Zhao, G. and Ding, X., 2016. Inter-annual variability of area-scaled gaseous carbon emissions from wetland soils in the Liaohe Delta, China. *PloS one*, *11*(8), p.e0160612.

Ye, S., Laws, E.A., Yuknis, N., Ding, X., Yuan, H., Zhao, G., Wang, J., Yu, X., Pei, S. and DeLaune, R.D., 2015. Carbon sequestration and soil accretion in coastal wetland communities of the Yellow River Delta and Liaohe Delta, China. *Estuaries and Coasts*, *38*(6), pp.1885-1897.

Yuan, J., Ding, W., Liu, D., Kang, H., Freeman, C., Xiang, J. and Lin, Y., 2015. Exotic Spartina alterniflora invasion alters ecosystem–atmosphere exchange of CH 4 and N2O and carbon sequestration in a coastal salt marsh in China. *Global Change Biology*, *21*(4), pp.1567-1580.

Zhang, G., Bai, J., Zhao, Q., Jia, J., Wang, X., Wang, W. and Wang, X., 2021. Soil carbon storage and carbon sources under different Spartina alterniflora invasion periods in a salt marsh ecosystem. *Catena*, *196*, p.104831.

Zhang, L., Song, L., Zhang, L., Shao, H., Chen, X. and Yan, K., 2013. Seasonal dynamics in nitrous oxide emissions under different types of vegetation in saline-alkaline soils of the Yellow River Delta, China and implications for eco-restoring coastal wetland. *Ecological engineering*, *61*, pp.82-89.

Zhang, J., Wuebbles, D.J., Kinnison, D.E. and Saiz‐Lopez, A., 2020. Revising the ozone depletion potentials metric for short‐lived chemicals such as CF3I and CH3I. *Journal of Geophysical Research: Atmospheres*, *125*(9), p.e2020JD032414.
